# Supplementary material for: Visible-light-induced photocatalyst-free cascade cyclization of 3-(2-(ethynyl)phenyl)quinazolinones to sulfonated quinolino[2,1-b]quinazolinones
Source: Royal Society of Chemistry journal article supplement (doi:10.1039/d4cc01970a), 2024-01-01
Supplement: d4cc01970a1.pdf [file d4cc01970a1.pdf]

## Supporting Information

### Visible-light-induced photocatalyst-free cascade cyclization of 3-(2-(ethynyl)phenyl)quinazolinones to sulfonated quinolino[2,1-*b*]quinazolinones

Fanlin Zeng,<sup>a</sup> Lili Wang,<sup>b</sup> Yuxin Luo,<sup>a</sup> Jianan Chen,<sup>a</sup> Jinling Li,<sup>\*a</sup> and Jinwei Yuan<sup>\*b</sup>

<sup>a</sup> College of Advanced Interdisciplinary Science and Technology (CAIST), Henan University of Technology, Zhengzhou 450001, China

<sup>b</sup> School of Chemistry & Chemical Engineering, Henan University of Technology, Zhengzhou 450001, China

### Table of Contents

|                                            |     |
|--------------------------------------------|-----|
| 1. General Information.....                | S2  |
| 2. Experimental procedures.....            | S2  |
| 3. Characterization Data for Products..... | S6  |
| 4. Copies of spectra of products.....      | S21 |
| 5. Reference .....                         | S57 |

## 1. General Information

All commercial reagents are used directly after purchase without further purification. Sulfonyl hydrazides were purchased from Shanghai Bide Pharmatech Co. Ltd. The products were purified by column chromatography using 200-300 mesh silica. All the NMR spectra were recorded on Bruker Avance 400 MHz spectrometer. Chemical shifts for  $^1\text{H}$  NMR spectra were given by tetramethylsilane as the internal standard. High-resolution mass spectrometry (HRMS) was performed on a 3000 mass spectrometer using a Waters Q-ToF MS/MS system with the ESI technique. The photochemical reactions were conducted under a blue LED (10 W, 457 nm). UV-visible absorption was measured using a UV spectrophotometer (Shimadzu, UV-2600).

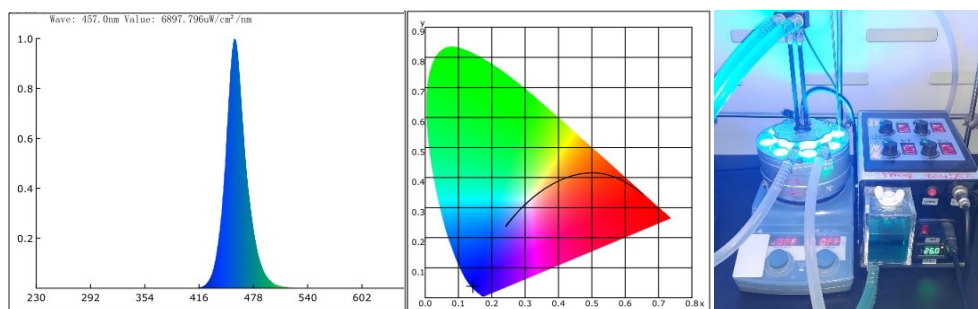

**Figure S1** The spectrum of our lamp (blue LED) and the visible-light irradiation instrument

## 2. Experimental procedures

### 2.1 Synthesis of the substrates **1**

As shown in Scheme S1, the 3-(2-(ethynyl)phenyl)quinazolinones (**1**) were synthesized according to the literature procedure.<sup>1</sup> A mixture of **A** (3 mmol, 1 equiv) and **B** (3.6 mmol, 1.2 equiv), triethyl orthoformate (4.5 mmol, 1.5 equiv), and  $\text{NH}_4\text{Cl}$  (1.2 mmol, 0.4 equiv) were heated with stirring at 100 °C in for 2 h. After cooling, 15 mL  $\text{H}_2\text{O}$  was added and the product was extracted with  $\text{CH}_2\text{Cl}_2$  (3 x 20 mL). The organic layer was dried with anhydrous sodium sulfate, and the solvent was evaporated under a vacuum. All the crude products were purified by silica gel chromatography using petroleum ether (PE) and ethyl acetate (EA) as eluting solvents to give the desired products **1**.

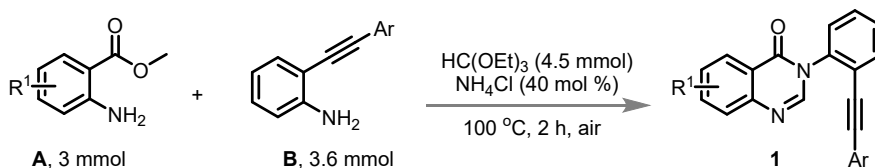

**Scheme S1** Synthesis of the substrates **1**

## 2.2 Synthesis of the products **3**

As shown in Scheme S2, the mixture of **1** (0.1 mmol, 1 equiv), **2** (0.2 mmol, 2 equiv),  $K_2S_2O_8$  (0.2 mmol, 54 mg), and MeCN (1.5 mL) were sequentially added into a 25 mL Schlenk tube. Then the reaction tube was exposed to the irradiation of a 10 W blue LED at room temperature in an  $N_2$  atmosphere for 36 h. After the reaction, the solvent was evaporated under vacuum, and all the crude products were purified by flash column chromatography using petroleum ether (PE) and ethyl acetate (EA) as the eluent to afford the target products **3**.

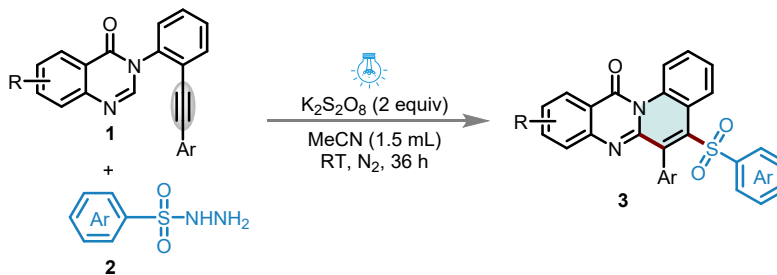

**Scheme S2** Synthesis of the products **3**

## 2.3 Gram-scale reaction

The gram-scale synthesis as shown in Scheme S3, the mixture of **1a** (2 mmol, 1 equiv), **2a** (4 mmol, 2 equiv.),  $K_2S_2O_8$  (4 mmol, 2 equiv), and MeCN (30 mL) were sequentially added into a 100 mL tube. Then the reaction tube was exposed to the irradiation of a 40 W Kessil blue lamp (456 nm) at room temperature in an  $N_2$  atmosphere for 36 h. After the reaction, the solvent was evaporated under vacuum, and all the crude products were purified by flash column chromatography using petroleum ether (PE) and ethyl acetate (EA) as the eluent to afford the target products **3a** (70% yield, 0.67 g).

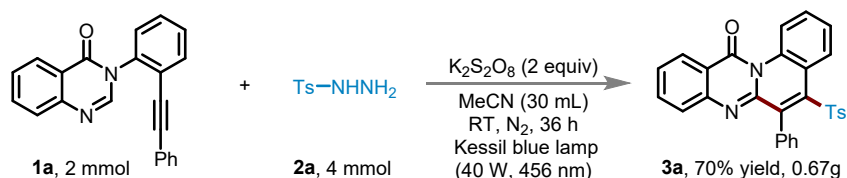

**Scheme S3** Gram-scale reaction of **3a**

## 2.4 The control experiments

The control experiments as shown in Scheme S4, the mixture of **1a** (0.1 mmol, 1 equiv), **2a** (0.2 mmol, 2 equiv),  $K_2S_2O_8$  (0.2 mmol, 54 mg), 2,2,6,6-tetramethylpiperidin-1-yl-oxidanyl (TEMPO) (0.3 mmol, 3 equiv) or 2,6-di-tert-butyl-4-methylphenol (BHT) (0.3 mmol, 3 equiv) and MeCN (1.5 mL) were sequentially added into a 25 mL Schlenk tube. Then the reaction tube was exposed to the irradiation of a 10 W blue LED at room temperature in an  $N_2$  atmosphere for 36 h. When TEMPO was

added, trace product generation was monitored by TLC. When BHT was added, the product was obtained by flash column chromatography using PE and EA as the eluent to afford the target product **3a** (15% yield). Meanwhile, the reaction solutions of both reactions were examined for their intermediates by HRMS.

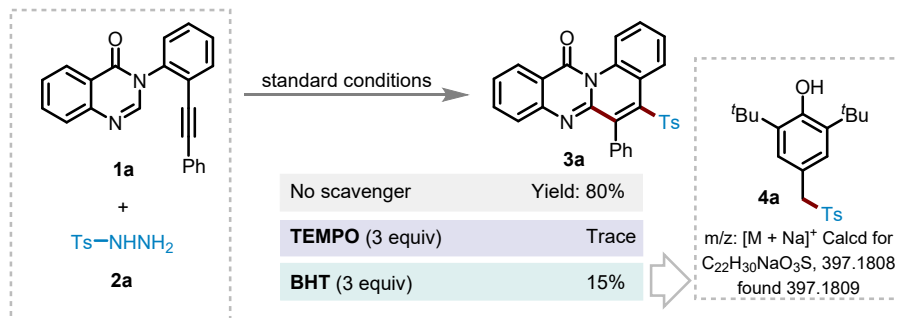

**Scheme S4** The control experiments

## 2.5 HRMS data of control experiments

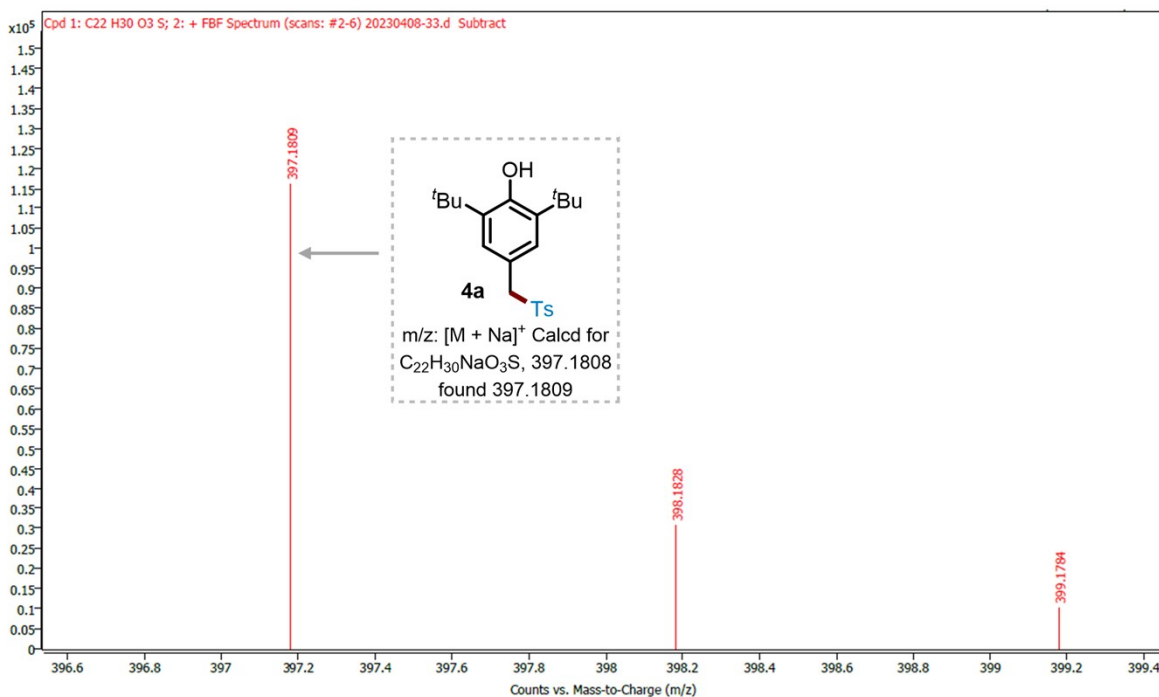

**Figure S2** HRMS data analysis of **4a**

## 2.6 The UV-Vis experiment of $K_2S_2O_8$ .

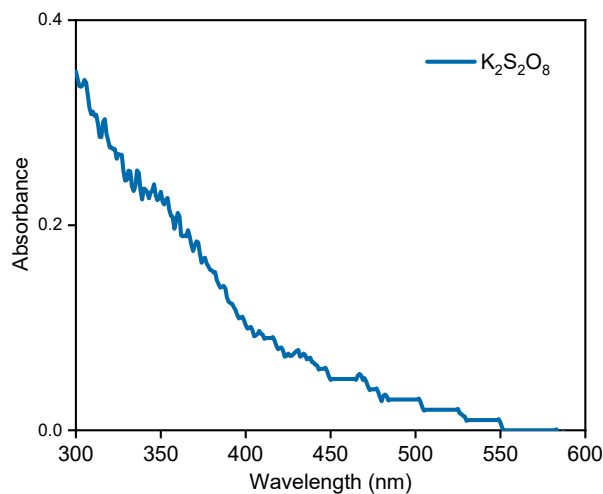

**Figure S3** Absorption spectra of  $K_2S_2O_8$  (0.1 mg/mL,  $CH_3CN/H_2O$  (v/v) = 9:1).

## 2.7 The EPR experiments.

The electron paramagnetic resonance (EPR) experiments were performed (Figure S4). When the radical spin trapping reagent 5,5-dimethyl-1-pyrroline *N*-oxide (DMPO) was added to the  $K_2S_2O_8$  solution under nitrogen atmosphere (Degassing by liquid nitrogen freezing) at room temperature, a signal was observed under blue LED irradiation for 0.5 h. However, the reaction system has no obvious signal before blue LED irradiation. It is suggested that the reaction generates sulfate radical anion under blue LED irradiation.

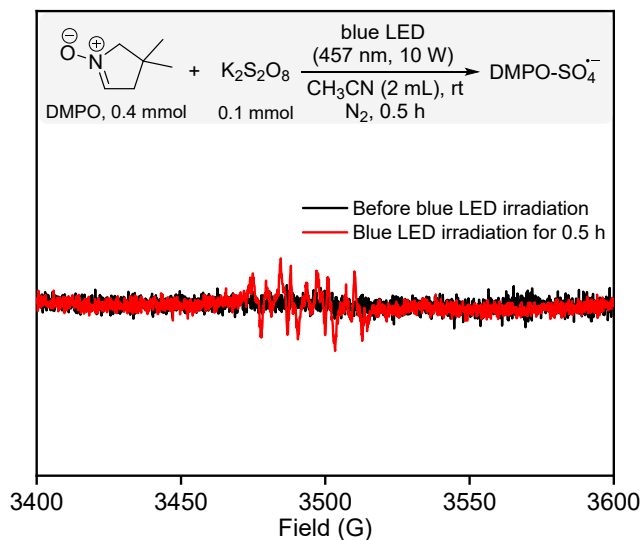

**Figure S4** The EPR experiments

### 3. Characterization Data for Products

#### 6-Phenyl-5-tosyl-12*H*-quinolino[2,1-*b*]quinazolin-12-one (3a)

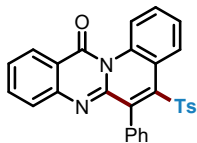

Purification by silica gel column chromatography (PE:EA, 5:1, v/v) to provide **3a**. Yellow solid (38.1 mg, 80% yield), mp 151 – 153 °C. <sup>1</sup>H NMR (400 MHz, Chloroform-*d*) δ 8.98 (dd, *J* = 8.6, 1.3 Hz, 1H), 8.78 (dd, *J* = 8.2, 1.6 Hz, 1H), 8.42 (dd, *J* = 7.9, 1.5 Hz, 1H), 7.81 – 7.66 (m, 1H), 7.61 – 7.47 (m, 4H), 7.38 – 7.29 (m, 3H), 7.27 – 7.19 (m, 2H), 7.14 – 7.06 (m, 2H), 7.00 (d, *J* = 8.1 Hz, 2H), 2.33 (s, 3H). <sup>13</sup>C{<sup>1</sup>H} NMR (101 MHz, Chloroform-*d*) δ 162.2, 147.0, 145.8, 143.8, 142.8, 139.6, 138.3, 134.6, 134.0, 133.7, 131.8, 129.3, 129.0, 128.6, 128.1, 127.6, 127.5, 127.24, 127.20, 127.0, 126.3, 120.8, 120.6, 120.3, 21.6. HRMS (ESI-TOF) *m/z*: [M + H]<sup>+</sup> Calcd for C<sub>29</sub>H<sub>21</sub>N<sub>2</sub>O<sub>3</sub>S, 477.1267, Found: 477.1272.

#### 9-Methyl-6-phenyl-5-tosyl-12*H*-quinolino[2,1-*b*]quinazolin-12-one (3b)

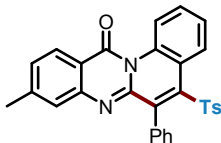

Purification by silica gel column chromatography (PE:EA, 5:1, v/v) to provide **3b**. Yellow solid (32.8 mg, 67% yield), mp >300 °C. <sup>1</sup>H NMR (400 MHz, Chloroform-*d*) δ 8.99 (dd, *J* = 8.7, 1.5 Hz, 1H), 8.77 (dd, *J* = 8.2, 1.8 Hz, 1H), 8.29 (dd, *J* = 8.1, 1.6 Hz, 1H), 7.61 – 7.52 (m, 1H), 7.52 – 7.46 (m, 1H), 7.40 – 7.28 (m, 5H), 7.27 – 7.17 (m, 2H), 7.13 – 7.07 (m, 2H), 7.04 – 6.96 (m, 2H), 2.44 (s, 3H), 2.33 (s, 3H). <sup>13</sup>C{<sup>1</sup>H} NMR (101 MHz, Chloroform-*d*) δ 162.1, 147.1, 145.9, 145.8, 143.8, 142.5, 139.7, 138.3, 134.1, 133.9, 131.7, 129.3, 129.0, 128.5, 127.6, 127.5, 127.2, 127.1, 126.9, 126.2, 120.8, 120.5, 117.9, 21.8, 21.5. HRMS (ESI-TOF) *m/z*: [M + H]<sup>+</sup> Calcd for C<sub>30</sub>H<sub>23</sub>N<sub>2</sub>O<sub>3</sub>S, 491.1424, Found: 491.1435.

#### 9-Methoxy-6-phenyl-5-tosyl-12*H*-quinolino[2,1-*b*]quinazolin-12-one (3c)

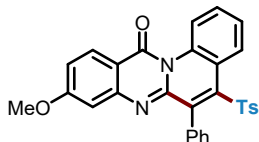

Purification by silica gel column chromatography (PE:EA, 3:1, v/v) to provide **3c**. Yellow solid (35.4 mg, 70% yield), mp >300 °C. <sup>1</sup>H NMR (400 MHz, Chloroform-*d*) δ 8.99 (dd, *J* = 8.7, 1.2 Hz, 1H), 8.76 (dd, *J* = 8.3, 1.6 Hz, 1H), 8.30 (d, *J* = 8.9 Hz, 1H), 7.60 – 7.53 (m, 1H), 7.52 – 7.46 (m, 1H), 7.41 – 7.34 (m, 1H), 7.32 – 7.21 (m, 4H), 7.14 – 7.07 (m, 3H), 7.01 (d, *J* = 8.1 Hz, 2H), 6.84 (d, *J* = 2.4 Hz, 1H), 3.84 (s, 3H), 2.33 (s, 3H). <sup>13</sup>C{<sup>1</sup>H} NMR (101 MHz, Chloroform-*d*) δ 164.9, 161.6, 148.1, 147.7,

143.8, 142.8, 139.5, 138.3, 134.1, 133.8, 131.8, 129.3, 129.0, 128.8, 128.6, 127.5, 127.3, 126.9, 126.1, 120.9, 120.4, 118.3, 113.9, 108.0, 55.8, 21.5. HRMS (ESI-TOF)  $m/z$ :  $[M + H]^+$  Calcd for  $C_{30}H_{23}N_2O_4S$ , 507.1373, Found: 507.1377.

**9-Chloro-6-phenyl-5-tosyl-12H-quinolino[2,1-b]quinazolin-12-one (3d)**

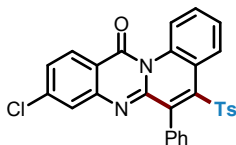

Purification by silica gel column chromatography (PE:EA, 5:1, v/v) to provide **3d**. Yellow solid (29.1 mg, 57% yield), mp 236 – 238 °C.  $^1H$  NMR (400 MHz, Chloroform-*d*)  $\delta$  8.97 (dd,  $J = 8.6, 1.3$  Hz, 1H), 8.81 (dd,  $J = 8.2, 1.6$  Hz, 1H), 8.33 (d,  $J = 8.6$  Hz, 1H), 7.63 – 7.57 (m, 1H), 7.56 – 7.49 (m, 2H), 7.46 (dd,  $J = 8.6, 2.0$  Hz, 1H), 7.38 – 7.33 (m, 1H), 7.32 – 7.28 (m, 2H), 7.23 (dd,  $J = 8.5, 7.0$  Hz, 2H), 7.10 – 7.04 (m, 2H), 7.01 (d,  $J = 8.1$  Hz, 2H), 2.34 (s, 3H).  $^{13}C\{^1H\}$  NMR (101 MHz, Chloroform-*d*)  $\delta$  161.6, 148.1, 146.6, 144.0, 143.5, 140.9, 139.2, 138.1, 133.8, 133.4, 131.7, 129.3, 129.2, 128.8, 128.7, 128.1, 127.5, 127.30, 127.26, 127.1, 126.6, 120.8, 120.5, 118.6, 21.6. HRMS (ESI-TOF)  $m/z$ :  $[M + H]^+$  Calcd for  $C_{29}H_{20}ClN_2O_3S$ , 511.0878, Found: 511.0886.

**9-Bromo-6-phenyl-5-tosyl-12H-quinolino[2,1-b]quinazolin-12-one (3e)**

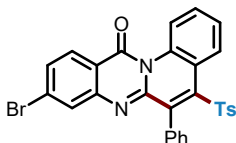

Purification by silica gel column chromatography (PE:EA, 5:1, v/v) to provide **3e**. Yellow solid (34.9 mg, 63% yield), mp 234 – 236 °C.  $^1H$  NMR (400 MHz, Chloroform-*d*)  $\delta$  8.97 (dd,  $J = 8.6, 1.3$  Hz, 1H), 8.81 (dd,  $J = 8.2, 1.6$  Hz, 1H), 8.25 (d,  $J = 8.6$  Hz, 1H), 7.68 (d,  $J = 1.8$  Hz, 1H), 7.63 – 7.58 (m, 2H), 7.58 – 7.50 (m, 1H), 7.40 – 7.32 (m, 1H), 7.33 – 7.28 (m, 2H), 7.23 (dd,  $J = 8.5, 6.9$  Hz, 2H), 7.10 – 7.04 (m, 2H), 7.02 – 6.98 (m, 2H), 2.34 (s, 3H).  $^{13}C\{^1H\}$  NMR (101 MHz, Chloroform-*d*)  $\delta$  161.7, 148.0, 146.6, 144.0, 143.5, 139.2, 138.1, 133.9, 133.5, 131.7, 130.8, 130.5, 129.5, 129.3, 129.2, 128.71, 128.69, 127.5, 127.3, 127.1, 126.6, 120.8, 120.5, 119.0, 21.6. HRMS (ESI-TOF)  $m/z$ :  $[M + H]^+$  Calcd for  $C_{29}H_{20}BrN_2O_3S$ , 555.0373, Found: 555.0381.

**6-Phenyl-5-tosyl-9-(trifluoromethyl)-12H-quinolino[2,1-b]quinazolin-12-one (3f)**

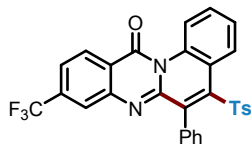

Purification by silica gel column chromatography (PE:EA, 5:1, v/v) to provide **3f**. Yellow solid (21.8 mg, 40% yield), mp 246 – 248 °C. <sup>1</sup>H NMR (400 MHz, Chloroform-*d*) δ 8.98 (dd, *J* = 8.6, 1.3 Hz, 1H), 8.83 (dd, *J* = 8.2, 1.6 Hz, 1H), 8.52 (d, *J* = 8.4 Hz, 1H), 7.80 – 7.74 (m, 1H), 7.70 (dd, *J* = 8.3, 1.7 Hz, 1H), 7.64 – 7.51 (m, 2H), 7.41 – 7.33 (m, 1H), 7.32 – 7.27 (m, 2H), 7.27 – 7.19 (m, 2H), 7.11 – 7.05 (m, 2H), 7.01 (d, *J* = 8.1 Hz, 2H), 2.34 (s, 3H). <sup>13</sup>C{<sup>1</sup>H} NMR (101 MHz, Chloroform-*d*) δ 161.5, 148.1, 145.7, 144.0, 143.8, 139.0, 138.0, 136.1 (q, *J*<sub>F-C</sub> = 33.1 Hz), 133.7, 133.3, 131.7, 129.4, 129.3, 128.8, 128.5, 127.5, 127.3, 127.1, 126.8, 125.5 (q, *J*<sub>F-C</sub> = 3.8 Hz), 123.3 (q, *J*<sub>F-C</sub> = 273.2 Hz), 123.2 (q, *J*<sub>F-C</sub> = 3.1 Hz), 122.3, 120.7, 120.6, 21.6. <sup>19</sup>F{<sup>1</sup>H} NMR (376 MHz, Chloroform-*d*) δ -63.20. HRMS (ESI-TOF) *m/z*: [M + H]<sup>+</sup> Calcd for C<sub>30</sub>H<sub>20</sub>F<sub>3</sub>N<sub>2</sub>O<sub>3</sub>S, 545.1141, Found: 545.1145.

#### 10-Methyl-6-phenyl-5-tosyl-12H-quinolino[2,1-b]quinazolin-12-one (**3g**)

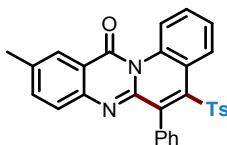

Purification by silica gel column chromatography (PE:EA, 5:1, v/v) to provide **3g**. Yellow solid (34.8 mg, 71% yield), mp 250 – 252 °C. <sup>1</sup>H NMR (400 MHz, Chloroform-*d*) δ 8.97 (dd, *J* = 8.7, 1.3 Hz, 1H), 8.76 (dd, *J* = 8.2, 1.6 Hz, 1H), 8.25 – 8.15 (m, 1H), 7.60 – 7.46 (m, 3H), 7.41 (d, *J* = 8.3 Hz, 1H), 7.38 – 7.27 (m, 3H), 7.23 (dd, *J* = 8.5, 6.9 Hz, 2H), 7.14 – 7.06 (m, 2H), 7.00 (d, *J* = 8.0 Hz, 2H), 2.52 (s, 3H), 2.32 (s, 3H). <sup>13</sup>C{<sup>1</sup>H} NMR (101 MHz, Chloroform-*d*) δ 162.2, 146.3, 143.9, 143.8, 142.2, 139.8, 138.3, 138.1, 136.2, 134.1, 133.8, 131.8, 129.3, 128.9, 128.6, 127.9, 127.5, 127.2, 126.9, 126.5, 126.2, 120.8, 120.6, 120.0, 21.6, 21.5. HRMS (ESI-TOF) *m/z*: [M + H]<sup>+</sup> Calcd for C<sub>30</sub>H<sub>23</sub>N<sub>2</sub>O<sub>3</sub>S, 491.1424, Found: 491.1425.

#### 9,10-Dimethoxy-6-phenyl-5-tosyl-12H-quinolino[2,1-b]quinazolin-12-one (**3h**)

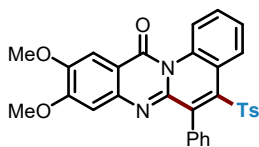



Purification by silica gel column chromatography (PE:EA, 3:1, v/v) to provide **3h**. Yellow solid (48.3 mg, 90% yield), mp 245 – 247 °C. <sup>1</sup>H NMR (400 MHz, Chloroform-*d*) δ 9.05 (d, *J* = 8.7 Hz, 1H), 8.76 (dd, 1H), 7.73 (s, 1H), 7.62 – 7.46 (m, 2H), 7.40 – 7.21 (m, 5H), 7.12 (d, *J* = 7.6 Hz, 2H), 7.01 (d, *J* = 8.1 Hz, 2H), 6.88 (s, 1H), 4.05 (s, 3H), 3.91 (s, 3H), 2.33 (s, 3H). <sup>13</sup>C{<sup>1</sup>H} NMR (101 MHz, Chloroform-*d*) δ 161.4, 155.4, 150.1, 146.0, 143.8, 142.4, 141.7, 139.6, 138.4, 134.1, 134.0, 131.7, 129.3, 128.8, 128.5, 127.4, 127.3, 126.8, 126.2, 120.9, 120.6, 114.0, 108.1, 105.8, 56.45, 56.44, 21.5. HRMS (ESI-TOF) *m/z*: [M + H]<sup>+</sup> Calcd for C<sub>31</sub>H<sub>25</sub>N<sub>2</sub>O<sub>3</sub>S, 537.1479, Found: 537.1480.

**6-(*p*-Tolyl)-5-tosyl-12*H*-quinolino[2,1-*b*]quinazolin-12-one (3i)**

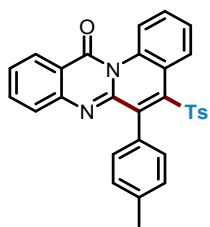

Purification by silica gel column chromatography (PE:EA, 5:1, v/v) to provide **3i**. Yellow solid (34.3 mg, 70% yield), mp 266 – 268 °C. <sup>1</sup>H NMR (400 MHz, Chloroform-*d*) δ 8.96 (dd, *J* = 8.6, 1.3 Hz, 1H), 8.74 (dd, *J* = 8.2, 1.6 Hz, 1H), 8.41 (dd, *J* = 8.0, 1.5 Hz, 1H), 7.75 – 7.66 (m, 1H), 7.59 – 7.43 (m, 4H), 7.36 – 7.27 (m, 2H), 7.00 (t, *J* = 6.5 Hz, 6H), 2.41 (s, 3H), 2.33 (s, 3H). <sup>13</sup>C{<sup>1</sup>H} NMR (101 MHz, CDCl<sub>3</sub>) δ 162.2, 147.1, 145.9, 143.8, 142.8, 139.5, 138.8, 138.3, 134.5, 133.9, 131.8, 130.7, 129.0, 128.9, 128.1, 128.0, 127.6, 127.5, 127.2, 126.9, 126.3, 120.8, 120.7, 120.3, 21.6, 21.5. HRMS (ESI-TOF) *m/z*: [M + H]<sup>+</sup> Calcd for C<sub>30</sub>H<sub>23</sub>N<sub>2</sub>O<sub>3</sub>S, 491.1424, Found: 491.1423.

**6-(4-Methoxyphenyl)-5-tosyl-12*H*-quinolino[2,1-*b*]quinazolin-12-one (3j)**

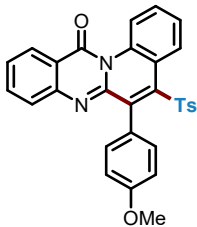

Purification by silica gel column chromatography (PE:EA, 3:1, v/v) to provide **3j**. Yellow solid (39.9 mg, 79% yield), mp 263 – 265 °C. <sup>1</sup>H NMR (400 MHz, Chloroform-*d*) δ 8.95 (d, *J* = 8.5 Hz, 1H), 8.74 (dd, *J* = 8.1, 1.6 Hz, 1H), 8.42 (dd, *J* = 8.0, 1.4 Hz, 1H), 7.79 – 7.64 (m, 1H), 7.60 – 7.43 (m, 4H),

7.36 – 7.20 (m, 2H), 7.02 (dd,  $J = 12.7, 8.3$  Hz, 4H), 6.79 – 6.65 (m, 2H), 3.88 (s, 3H), 2.32 (s, 3H).  $^{13}\text{C}\{^1\text{H}\}$  NMR (101 MHz, Chloroform-*d*)  $\delta$  162.2, 160.3, 147.3, 145.9, 143.7, 142.8, 139.0, 138.4, 134.6, 133.8, 133.6, 129.1, 128.8, 128.0, 127.5, 127.4, 127.3, 126.9, 126.3, 125.7, 120.9, 120.8, 120.3, 112.8, 55.3, 21.5. HRMS (ESI-TOF)  $m/z$ :  $[\text{M} + \text{H}]^+$  Calcd for  $\text{C}_{30}\text{H}_{23}\text{N}_2\text{O}_4\text{S}$ , 507.1373, Found: 507.1377.

**6-(4-(*tert*-Bbutyl)phenyl)-5-tosyl-12H-quinolino[2,1-*b*]quinazolin-12-one (3k)**

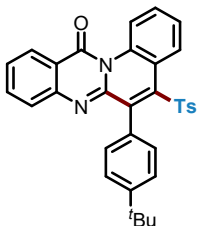

Purification by silica gel column chromatography (PE:EA, 5:1, v/v) to provide **3k**. Yellow solid (47.8 mg, 90% yield), mp 284 – 286 °C.  $^1\text{H}$  NMR (400 MHz, Chloroform-*d*)  $\delta$  8.96 (dd,  $J = 8.5, 1.3$  Hz, 1H), 8.78 (dd,  $J = 8.1, 1.7$  Hz, 1H), 8.43 (dd,  $J = 8.0, 1.5$  Hz, 1H), 7.78 – 7.65 (m, 1H), 7.62 – 7.49 (m, 4H), 7.20 (dd,  $J = 15.9, 8.3$  Hz, 4H), 6.97 (dd,  $J = 20.4, 8.2$  Hz, 4H), 2.31 (s, 3H), 1.39 (s, 9H).  $^{13}\text{C}\{^1\text{H}\}$  NMR (101 MHz,  $\text{CDCl}_3$ )  $\delta$  162.2, 151.9, 147.1, 145.8, 143.4, 143.2, 139.1, 138.3, 134.5, 133.8, 131.9, 130.3, 129.1, 128.9, 128.1, 127.5, 127.5, 127.3, 127.0, 126.3, 124.2, 120.9, 120.8, 120.3, 34.7, 31.4, 21.5. HRMS (ESI-TOF)  $m/z$ :  $[\text{M} + \text{H}]^+$  Calcd for  $\text{C}_{33}\text{H}_{29}\text{N}_2\text{O}_3\text{S}$ , 533.1893, Found: 533.1898.

**6-(4-Chlorophenyl)-5-tosyl-12H-quinolino[2,1-*b*]quinazolin-12-one (3l)**

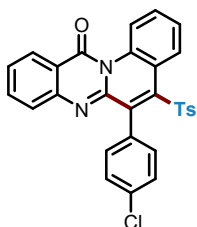

Purification by silica gel column chromatography (PE:EA, 5:1, v/v) to provide **3l**. Yellow solid (28.1 mg, 55% yield), mp 220 – 222 °C.  $^1\text{H}$  NMR (400 MHz, Chloroform-*d*)  $\delta$  8.99 (dd,  $J = 8.6, 1.2$  Hz, 1H), 8.77 (dd,  $J = 8.2, 1.6$  Hz, 1H), 8.41 (dd,  $J = 8.0, 1.5$  Hz, 1H), 7.79 – 7.67 (m, 1H), 7.63 – 7.46 (m, 4H), 7.39 – 7.31 (m, 2H), 7.23 – 7.16 (m, 2H), 7.10 – 7.00 (m, 4H), 2.36 (s, 3H).  $^{13}\text{C}\{^1\text{H}\}$  NMR (101 MHz,  $\text{CDCl}_3$ )  $\delta$  162.1, 146.7, 145.7, 144.3, 143.2, 138.11, 138.09, 135.0, 134.7, 134.1, 133.0, 132.2,

129.32, 129.27, 127.9, 127.7, 127.6, 127.5, 127.3, 126.9, 126.4, 120.9, 120.33, 120.25, 21.6. HRMS (ESI-TOF)  $m/z$ :  $[M + H]^+$  Calcd for  $C_{29}H_{20}ClN_2O_3S$ , 511.0878, Found: 511.0881.

**6-(4-Bromophenyl)-5-tosyl-12H-quinolino[2,1-b]quinazolin-12-one (3m)**

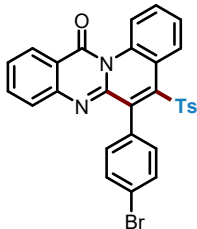

Purification by silica gel column chromatography (PE:EA, 5:1, v/v) to provide **3m**. Yellow solid (24.4 mg, 44% yield), mp 265 – 267 °C.  $^1H$  NMR (400 MHz, Chloroform-*d*)  $\delta$  8.99 (dd,  $J = 8.6, 1.2$  Hz, 1H), 8.77 (dd,  $J = 8.2, 1.5$  Hz, 1H), 8.42 (dd,  $J = 8.0, 1.5$  Hz, 1H), 7.78 – 7.69 (m, 1H), 7.62 – 7.48 (m, 4H), 7.37 – 7.31 (m, 4H), 7.08 (d,  $J = 8.1$  Hz, 2H), 7.02 – 6.92 (m, 2H), 2.37 (s, 3H).  $^{13}C\{^1H\}$  NMR (101 MHz, Chloroform-*d*)  $\delta$  162.1, 146.6, 145.7, 144.4, 143.2, 138.1, 138.0, 134.7, 134.1, 133.3, 132.7, 130.4, 129.34, 129.29, 127.9, 127.7, 127.6, 127.3, 127.0, 126.4, 123.4, 120.9, 120.32, 120.25, 21.6. HRMS (ESI-TOF)  $m/z$ :  $[M + H]^+$  Calcd for  $C_{29}H_{20}BrN_2O_3S$ , 555.0373, Found: 555.0373.

**Methyl 4-(12-oxo-5-tosyl-12H-quinolino[2,1-b]quinazolin-6-yl)benzoate (3n)**

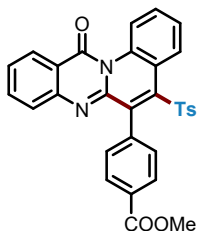

Purification by silica gel column chromatography (PE:EA, 3:1, v/v) to provide **3n**. Yellow solid (26.2 mg, 49% yield), mp >300 °C.  $^1H$  NMR (400 MHz, Chloroform-*d*)  $\delta$  9.02 (dd,  $J = 8.7, 1.2$  Hz, 1H), 8.78 (dd,  $J = 8.2, 1.6$  Hz, 1H), 8.41 (dd,  $J = 8.0, 1.5$  Hz, 1H), 7.93 (d,  $J = 8.3$  Hz, 2H), 7.76 – 7.69 (m, 1H), 7.63 – 7.43 (m, 4H), 7.40 – 7.35 (m, 2H), 7.24 – 7.16 (m, 2H), 7.08 – 7.00 (m, 2H), 3.99 (s, 3H), 2.35 (s, 3H).  $^{13}C\{^1H\}$  NMR (101 MHz, Chloroform-*d*)  $\delta$  166.9, 162.1, 146.5, 145.7, 144.5, 142.7, 138.9, 138.7, 138.0, 134.7, 134.2, 131.4, 129.9, 129.5, 129.4, 128.4, 127.9, 127.8, 127.6, 127.3, 126.9, 126.4, 120.9, 120.3, 120.1, 52.3, 21.6. HRMS (ESI-TOF)  $m/z$ :  $[M + H]^+$  Calcd for  $C_{31}H_{23}N_2O_5S$ , 535.1322, Found: 535.1324.

**6-Phenyl-5-(phenylsulfonyl)-12H-quinolino[2,1-b]quinazolin-12-one (3o)**

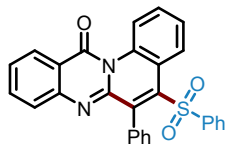

Purification by silica gel column chromatography (PE:EA, 5:1, v/v) to provide **3o**. Yellow solid (39.3 mg, 85% yield), mp 254 – 256 °C. <sup>1</sup>H NMR (400 MHz, Chloroform-*d*) δ 8.98 (dd, *J* = 8.6, 1.3 Hz, 1H), 8.77 (dd, *J* = 8.2, 1.6 Hz, 1H), 8.40 (dd, *J* = 8.0, 1.5 Hz, 1H), 7.74 – 7.64 (m, 1H), 7.61 – 7.47 (m, 4H), 7.43 – 7.29 (m, 4H), 7.24 – 7.17 (m, 4H), 7.12 – 7.05 (m, 2H). <sup>13</sup>C{<sup>1</sup>H} NMR (101 MHz, CDCl<sub>3</sub>) δ 162.2, 146.9, 145.8, 142.6, 141.3, 139.7, 134.6, 134.0, 133.5, 132.8, 131.9, 129.1, 128.7, 128.0, 127.6, 127.38, 127.35, 127.3, 126.9, 126.4, 120.8, 120.5, 120.3. HRMS (ESI-TOF) *m/z*: [M + H]<sup>+</sup> Calcd for C<sub>28</sub>H<sub>19</sub>N<sub>2</sub>O<sub>3</sub>S, 463.1111, Found: 463.1120.

**5-((4-Methoxyphenyl)sulfonyl)-6-phenyl-12H-quinolino[2,1-b]quinazolin-12-one (3p)**

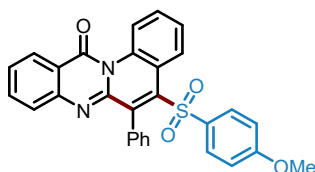

Purification by silica gel column chromatography (PE:EA, 3:1, v/v) to provide **3p**. Yellow solid (39.3 mg, 80% yield), mp 128 – 130 °C. <sup>1</sup>H NMR (400 MHz, Chloroform-*d*) δ 8.98 (dd, *J* = 8.6, 1.4 Hz, 1H), 8.80 (dd, *J* = 8.2, 1.6 Hz, 1H), 8.42 (dd, *J* = 8.0, 1.6 Hz, 1H), 7.78 – 7.67 (m, 1H), 7.62 – 7.48 (m, 4H), 7.41 – 7.30 (m, 3H), 7.29 – 7.20 (m, 2H), 7.14 – 7.07 (m, 2H), 6.69 – 6.62 (m, 2H), 3.80 (s, 3H). <sup>13</sup>C{<sup>1</sup>H} NMR (101 MHz, Chloroform-*d*) δ 163.1, 162.2, 147.0, 145.8, 143.2, 139.2, 134.6, 134.0, 133.8, 132.6, 131.8, 129.8, 129.0, 128.7, 128.0, 127.6, 127.3, 127.2, 127.0, 126.3, 120.8, 120.7, 120.2, 114.0, 55.7. HRMS (ESI-TOF) *m/z*: [M + H]<sup>+</sup> Calcd for C<sub>29</sub>H<sub>21</sub>N<sub>2</sub>O<sub>4</sub>S, 493.1217, Found: 493.1222.

**5-((4-tert-butylphenyl)sulfonyl)-6-phenyl-12H-quinolino[2,1-b]quinazolin-12-one (3q)**

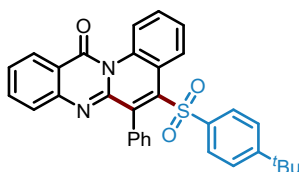

Purification by silica gel column chromatography (PE:EA, 5:1, v/v) to provide **3q**. Yellow solid (38.8 mg, 75% yield), mp 230 – 232 °C. <sup>1</sup>H NMR (400 MHz, Chloroform-*d*) δ 8.99 (dd, *J* = 8.5, 1.4 Hz, 1H), 8.82 (dd, *J* = 8.1, 1.6 Hz, 1H), 8.42 (dd, *J* = 8.0, 1.5 Hz, 1H), 7.78 – 7.67 (m, 1H), 7.64 – 7.45 (m, 4H), 7.34 – 7.27 (m, 3H), 7.22 – 7.13 (m, 4H), 7.11 – 7.01 (m, 2H), 1.28 (s, 9H). <sup>13</sup>C NMR (101 MHz, Chloroform-*d*) δ 162.2, 156.6, 147.0, 145.8, 143.1, 139.2, 138.1, 134.6, 134.0, 133.6, 131.9, 129.0, 128.5, 128.0, 127.6, 127.4, 127.3, 127.3, 127.1, 126.4, 125.7, 120.8, 120.7, 120.3, 35.1, 31.0. HRMS (ESI-TOF) *m/z*: [M + H]<sup>+</sup> Calcd for C<sub>32</sub>H<sub>27</sub>N<sub>2</sub>O<sub>3</sub>S, 519.1737, Found: 519.1744.

**5-([1,1'-biphenyl]-4-ylsulfonyl)-6-phenyl-12*H*-quinolino[2,1-*b*]quinazolin-12-one (3r)**

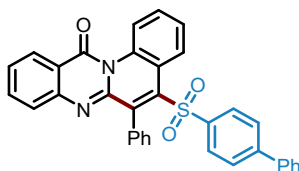

Purification by silica gel column chromatography (PE:EA, 5:1, v/v) to provide **3r**. Yellow solid (43.1 mg, 80% yield), mp 262 – 264 °C. <sup>1</sup>H NMR (400 MHz, Chloroform-*d*) δ 9.00 (dd, *J* = 8.5, 1.4 Hz, 1H), 8.82 (dd, *J* = 8.1, 1.7 Hz, 1H), 8.42 (dd, *J* = 8.0, 1.5 Hz, 1H), 7.75 – 7.68 (m, 1H), 7.64 – 7.58 (m, 1H), 7.57 – 7.32 (m, 13H), 7.20 (dd, *J* = 8.6, 7.0 Hz, 2H), 7.13 – 7.06 (m, 2H). <sup>13</sup>C NMR (101 MHz, CDCl<sub>3</sub>) δ 162.2, 146.9, 145.8, 145.7, 143.0, 139.6, 139.30, 139.28, 134.6, 134.0, 133.6, 132.0, 129.14, 129.07, 128.7, 128.6, 128.02, 127.97, 127.6, 127.31, 127.27, 127.0, 126.4, 120.9, 120.5, 120.3. HRMS (ESI-TOF) *m/z*: [M + H]<sup>+</sup> Calcd for C<sub>34</sub>H<sub>23</sub>N<sub>2</sub>O<sub>3</sub>S, 539.1424, Found: 539.1426.

**5-((4-fluorophenyl)sulfonyl)-6-phenyl-12*H*-quinolino[2,1-*b*]quinazolin-12-one (3s)**

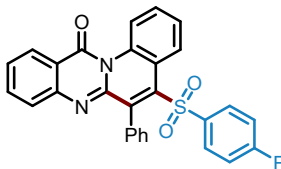

Purification by silica gel column chromatography (PE:EA, 5:1, v/v) to provide **3s**. Yellow solid (48.0 mg, 81% yield), mp 240 – 242 °C. <sup>1</sup>H NMR (400 MHz, Chloroform-*d*) δ 8.99 (dd, *J* = 8.6, 1.3 Hz, 1H), 8.76 (dd, *J* = 8.1, 1.7 Hz, 1H), 8.42 (dd, *J* = 8.0, 1.5 Hz, 1H), 7.77 – 7.68 (m, 1H), 7.65 – 7.58 (m, 1H), 7.57 – 7.47 (m, 3H), 7.42 – 7.33 (m, 3H), 7.29 – 7.20 (m, 2H), 7.11 – 7.03 (m, 2H), 6.92 – 6.81 (m, 2H). <sup>13</sup>C NMR (101 MHz, Chloroform-*d*) δ 165.1 (d, *J* = 256.4 Hz), 162.1, 146.8, 145.8, 142.9, 139.3,

137.1 (d,  $J = 3.1$  Hz), 134.7, 134.07, 133.5, 132.0, 130.4, 130.3, 129.2, 128.9, 128.1, 127.7, 127.4, 127.3, 126.9, 126.4, 120.9, 120.3 (d,  $J = 12.7$  Hz), 116.1, 115.8.  $^{19}\text{F}$  NMR (376 MHz, Chloroform- $d$ )  $\delta$  -103.98. HRMS (ESI-TOF)  $m/z$ :  $[\text{M} + \text{H}]^+$  Calcd for  $\text{C}_{28}\text{H}_{18}\text{FN}_2\text{O}_3\text{S}$ , 481.1017, Found: 481.1025.

**5-((4-chlorophenyl)sulfonyl)-6-phenyl-12H-quinolino[2,1-b]quinazolin-12-one (3t)**

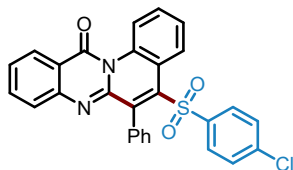

Purification by silica gel column chromatography (PE:EA, 5:1, v/v) to provide **3t**. Yellow solid (34.7 mg, 70% yield), mp 246 – 248 °C.  $^1\text{H}$  NMR (400 MHz, Chloroform- $d$ )  $\delta$  8.99 (dd,  $J = 8.6, 1.3$  Hz, 1H), 8.75 (dd,  $J = 8.2, 1.7$  Hz, 1H), 8.42 (dd,  $J = 8.0, 1.5$  Hz, 1H), 7.76 – 7.67 (m, 1H), 7.64 – 7.58 (m, 1H), 7.57 – 7.47 (m, 3H), 7.41 – 7.34 (m, 1H), 7.32 – 7.21 (m, 4H), 7.19 – 7.13 (m, 2H), 7.07 (dd,  $J = 7.8, 1.4$  Hz, 2H).  $^{13}\text{C}$  NMR (101 MHz, Chloroform- $d$ )  $\delta$  162.1, 146.7, 145.7, 142.7, 139.6, 139.5, 139.3, 134.7, 134.0, 133.4, 132.1, 129.2, 129.0, 128.9, 128.8, 128.0, 127.7, 127.4, 127.3, 126.9, 126.4, 120.9, 120.3, 120.3. HRMS (ESI-TOF)  $m/z$ :  $[\text{M} + \text{H}]^+$  Calcd for  $\text{C}_{28}\text{H}_{18}\text{ClN}_2\text{O}_3\text{S}$ , 497.0721, Found: 497.0729.

**5-((4-bromophenyl)sulfonyl)-6-phenyl-12H-quinolino[2,1-b]quinazolin-12-one (3u)**

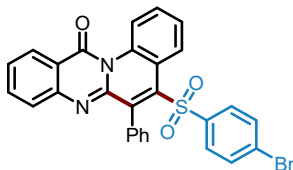

Purification by silica gel column chromatography (PE:EA, 5:1, v/v) to provide **3u**. Yellow solid (39.4 mg, 73% yield), mp 268 – 270 °C.  $^1\text{H}$  NMR (400 MHz, Chloroform- $d$ )  $\delta$  9.00 (dd,  $J = 8.6, 1.3$  Hz, 1H), 8.75 (dd,  $J = 8.2, 1.6$  Hz, 1H), 8.48 – 8.37 (m, 1H), 7.78 – 7.67 (m, 1H), 7.66 – 7.58 (m, 1H), 7.57 – 7.48 (m, 3H), 7.41 – 7.35 (m, 1H), 7.34 – 7.29 (m, 2H), 7.25 – 7.19 (m, 4H), 7.09 – 7.03 (m, 2H).  $^{13}\text{C}$  NMR (101 MHz, Chloroform- $d$ )  $\delta$  162.1, 146.7, 145.7, 142.7, 140.1, 139.3, 134.7, 134.0, 133.4, 132.1, 131.9, 129.3, 129.0, 128.9, 128.2, 128.0, 127.7, 127.4, 127.3, 126.8, 126.4, 120.9, 120.33, 120.29. HRMS (ESI-TOF)  $m/z$ :  $[\text{M} + \text{H}]^+$  Calcd for  $\text{C}_{28}\text{H}_{18}\text{BrN}_2\text{O}_3\text{S}$ , 541.0216, Found: 541.0222.

**6-Phenyl-5-((4-(trifluoromethoxy)phenyl)sulfonyl)-12H-quinolino[2,1-b]quinazolin-12-one (3v)**

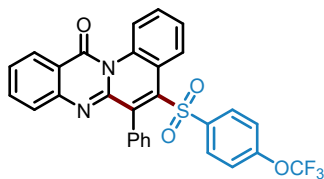

Purification by silica gel column chromatography (PE:EA, 5:1, v/v) to provide **3v**. Yellow solid (45.3 mg, 83% yield), mp 208 – 210 °C. <sup>1</sup>H NMR (400 MHz, Chloroform-*d*) δ 8.98 (dd, *J* = 8.6, 1.3 Hz, 1H), 8.75 (dd, *J* = 8.2, 1.6 Hz, 1H), 8.40 (dd, *J* = 8.0, 1.5 Hz, 1H), 7.76 – 7.67 (m, 1H), 7.64 – 7.57 (m, 1H), 7.56 – 7.45 (m, 3H), 7.42 – 7.30 (m, 3H), 7.20 (dd, *J* = 8.5, 7.0 Hz, 2H), 7.08 – 6.94 (m, 4H). <sup>13</sup>C{<sup>1</sup>H} NMR (101 MHz, Chloroform-*d*) δ 162.1, 152.0 (q, *J*<sub>F-C</sub> = 1.8 Hz), 146.7, 145.7, 142.8, 139.4, 139.1, 134.7, 134.0, 133.4, 132.2, 129.7, 129.3, 129.0, 128.0, 127.7, 127.4, 127.3, 126.9, 126.4, 120.9, 120.6, 120.3, 120.3, 120.2 (q, *J*<sub>F-C</sub> = 259.6 Hz). <sup>19</sup>F{<sup>1</sup>H} NMR (376 MHz, Chloroform-*d*) δ -57.57. HRMS (ESI-TOF) *m/z*: [M + H]<sup>+</sup> Calcd for C<sub>29</sub>H<sub>18</sub>F<sub>3</sub>N<sub>2</sub>O<sub>4</sub>S, 547.0934, Found: 547.0939.

**6-Phenyl-5-((4-(trifluoromethyl)phenyl)sulfonyl)-12H-quinolino[2,1-*b*]quinazolin-12-one (3w)**

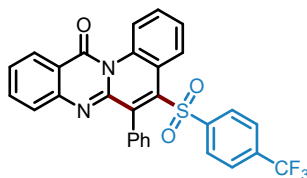

Purification by silica gel column chromatography (PE:EA, 5:1, v/v) to provide **3w**. Yellow solid (44.5 mg, 84% yield), mp 250 – 252 °C. <sup>1</sup>H NMR (400 MHz, Chloroform-*d*) δ 9.00 (dd, *J* = 8.6, 1.3 Hz, 1H), 8.75 (dd, *J* = 8.2, 1.6 Hz, 1H), 8.42 (dd, *J* = 8.0, 1.5 Hz, 1H), 7.76 – 7.68 (m, 1H), 7.66 – 7.60 (m, 1H), 7.58 – 7.51 (m, 2H), 7.51 – 7.40 (m, 5H), 7.37 – 7.31 (m, 1H), 7.17 (dd, *J* = 8.6, 7.0 Hz, 2H), 7.07 – 6.99 (m, 2H). <sup>13</sup>C{<sup>1</sup>H} NMR (101 MHz, Chloroform-*d*) δ 162.1, 146.6, 145.7, 144.6, 142.5, 139.3, 134.7, 134.2 (q, *J*<sub>F-C</sub> = 33.2 Hz), 134.1, 133.2, 132.3, 129.4, 129.0, 128.0, 127.9, 127.8, 127.5, 127.3, 126.8, 126.5, 125.6 (q, *J*<sub>F-C</sub> = 3.8 Hz), 124.4 (q, *J*<sub>F-C</sub> = 273.6 Hz), 121.0, 120.3, 120.2. <sup>19</sup>F{<sup>1</sup>H} NMR (376 MHz, Chloroform-*d*) δ -63.41. HRMS (ESI-TOF) *m/z*: [M + H]<sup>+</sup> Calcd for C<sub>29</sub>H<sub>18</sub>F<sub>3</sub>N<sub>2</sub>O<sub>3</sub>S, 531.0985, Found: 531.0990.

**6-Phenyl-5-(*o*-tolylsulfonyl)-12H-quinolino[2,1-*b*]quinazolin-12-one (3x)**

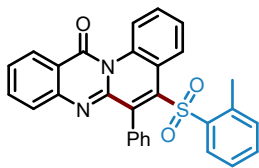

Purification by silica gel column chromatography (PE:EA, 5:1, v/v) to provide **3x**. Yellow solid (26.6 mg, 56% yield), mp 205 – 207 °C. <sup>1</sup>H NMR (400 MHz, Chloroform-*d*) δ 9.02 (dd, *J* = 8.7, 1.2 Hz, 1H), 8.77 (dd, *J* = 8.3, 1.6 Hz, 1H), 8.44 (dd, *J* = 8.1, 1.5 Hz, 1H), 7.79 – 7.68 (m, 1H), 7.64 – 7.46 (m, 4H), 7.34 – 7.21 (m, 3H), 7.15 (t, *J* = 7.6 Hz, 2H), 7.11 – 7.01 (m, 3H), 6.94 (t, *J* = 7.7 Hz, 1H), 2.25 (s, 3H). <sup>13</sup>C{<sup>1</sup>H} NMR (101 MHz, Chloroform-*d*) δ 162.1, 146.8, 145.8, 142.3, 139.8, 139.1, 136.6, 134.7, 134.2, 133.0, 132.7, 131.8, 131.6, 129.2, 129.0, 128.7, 128.1, 127.7, 127.3, 127.2, 127.1, 126.4, 126.3, 120.7, 120.3, 120.2, 20.3. HRMS (ESI-TOF) *m/z*: [M + H]<sup>+</sup> Calcd for C<sub>29</sub>H<sub>21</sub>N<sub>2</sub>O<sub>3</sub>S, 477.1267, Found: 477.1270.

**5-(3-Chlorophenylsulfonyl)-6-phenyl-12H-quinolino[2,1-b]quinazolin-12-one (3y)**

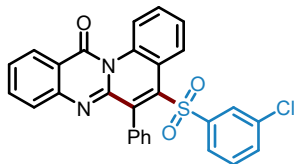

Purification by silica gel column chromatography (PE:EA, 5:1, v/v) to provide **3y**. Yellow solid (22.3 mg, 45% yield), mp 257 – 259 °C. <sup>1</sup>H NMR (400 MHz, Chloroform-*d*) δ 9.00 (dd, *J* = 8.7, 1.2 Hz, 1H), 8.76 (dd, *J* = 8.2, 1.6 Hz, 1H), 8.42 (dd, *J* = 8.0, 1.4 Hz, 1H), 7.75 – 7.66 (m, 1H), 7.65 – 7.58 (m, 1H), 7.57 – 7.47 (m, 3H), 7.42 – 7.30 (m, 3H), 7.27 – 7.12 (m, 4H), 7.09 – 7.00 (m, 2H). <sup>13</sup>C{<sup>1</sup>H} NMR (101 MHz, Chloroform-*d*) δ 162.1, 146.7, 145.7, 142.9, 142.6, 139.5, 134.9, 134.7, 134.1, 133.0, 132.9, 132.1, 129.9, 129.3, 129.1, 128.0, 127.9, 127.7, 127.4, 127.3, 126.8, 126.4, 125.5, 120.9, 120.31, 120.29. HRMS (ESI-TOF) *m/z*: [M + H]<sup>+</sup> Calcd for C<sub>28</sub>H<sub>18</sub>ClN<sub>2</sub>O<sub>3</sub>S, 497.0721, Found: 497.0723.

**5-(Naphthalen-2-ylsulfonyl)-6-phenyl-12H-quinolino[2,1-b]quinazolin-12-one (3z)**

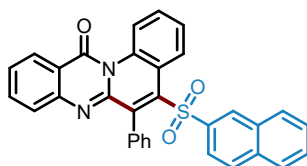



Purification by silica gel column chromatography (PE:EA, 3:1, v/v) to provide **3z**. Yellow solid (20.4 mg, 40% yield), mp 248 – 250 °C. <sup>1</sup>H NMR (400 MHz, Chloroform-*d*) δ 9.00 (dd, *J* = 8.6, 1.4 Hz, 1H), 8.86 (dd, *J* = 8.1, 1.7 Hz, 1H), 8.42 (dd, *J* = 8.1, 1.5 Hz, 1H), 7.87 (d, *J* = 1.9 Hz, 1H), 7.80 (d, *J* = 8.1 Hz, 1H), 7.73 – 7.65 (m, 3H), 7.64 – 7.58 (m, 2H), 7.57 – 7.50 (m, 3H), 7.49 – 7.40 (m, 2H), 7.12 – 7.05 (m, 1H), 7.04 – 6.99 (m, 2H), 6.98 – 6.93 (m, 2H). <sup>13</sup>C{<sup>1</sup>H} NMR (101 MHz, Chloroform-*d*) δ 162.2, 146.9, 145.8, 142.8, 139.5, 137.6, 134.7, 134.6, 134.0, 133.2, 131.9, 131.8, 129.8, 129.4, 129.14, 129.12, 129.0, 128.9, 128.0, 127.7, 127.6, 127.4, 127.3, 127.1, 127.0, 126.4, 121.9, 120.8, 120.6, 120.3. HRMS (ESI-TOF) *m/z*: [M + H]<sup>+</sup> Calcd for C<sub>32</sub>H<sub>21</sub>N<sub>2</sub>O<sub>3</sub>S, 513.1267, Found: 513.1269.

**5-((2,3-Dihydrobenzofuran-5-yl)sulfonyl)-6-phenyl-12H-quinolino[2,1-*b*]quinazolin-12-one (3aa)**

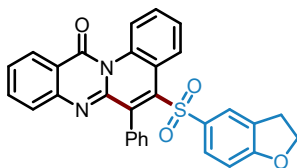

Purification by silica gel column chromatography (PE:EA, 3:1, v/v) to provide **3aa**. Yellow solid (32.7 mg, 65% yield), mp 218 – 220 °C. <sup>1</sup>H NMR (400 MHz, Chloroform-*d*) δ 8.97 (dd, *J* = 8.6, 1.3 Hz, 1H), 8.81 (dd, *J* = 8.2, 1.7 Hz, 1H), 8.41 (dd, *J* = 8.0, 1.5 Hz, 1H), 7.79 – 7.64 (m, 1H), 7.62 – 7.56 (m, 1H), 7.55 – 7.48 (m, 3H), 7.39 – 7.32 (m, 1H), 7.29 – 7.20 (m, 3H), 7.14 – 7.04 (m, 3H), 6.56 (d, *J* = 8.5 Hz, 1H), 4.60 (t, *J* = 8.8 Hz, 2H), 3.04 (t, *J* = 8.7 Hz, 2H). <sup>13</sup>C{<sup>1</sup>H} NMR (101 MHz, CDCl<sub>3</sub>) δ 164.2, 162.2, 147.1, 145.8, 143.8, 138.8, 134.6, 134.0, 133.8, 132.4, 131.9, 129.5, 129.0, 128.3, 128.0, 127.7, 127.5, 127.2, 127.13, 127.07, 126.3, 125.3, 120.8, 120.7, 120.2, 109.4, 72.4, 28.6. HRMS (ESI-TOF) *m/z*: [M + H]<sup>+</sup> Calcd for C<sub>30</sub>H<sub>21</sub>N<sub>2</sub>O<sub>4</sub>S, 505.1217, Found: 505.1224.

**6-(naphthalen-1-yl)-5-tosyl-12H-quinolino[2,1-*b*]quinazolin-12-one (3ab)**

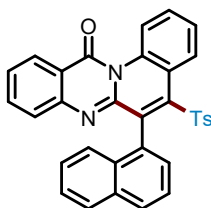

Purification by silica gel column chromatography (PE:EA, 5:1, v/v) to provide **3ab**. Yellow solid (25.5 mg, 48% yield), mp 145 – 147 °C. <sup>1</sup>H NMR (400 MHz, Chloroform-*d*) δ 9.04 (d, *J* = 9.1 Hz,

1H), 8.88 (dd,  $J = 8.3, 1.5$  Hz, 1H), 8.32 (dd,  $J = 8.0, 1.5$  Hz, 1H), 7.76 (dd,  $J = 7.8, 1.7$  Hz, 1H), 7.61 – 7.54 (m, 2H), 7.53 – 7.36 (m, 5H), 7.22 (t,  $J = 7.5$  Hz, 1H), 7.03 (dd,  $J = 8.1, 5.9$  Hz, 3H), 6.99 – 6.94 (m, 1H), 6.85 (d,  $J = 8.4$  Hz, 1H), 6.50 (d,  $J = 8.0$  Hz, 2H), 1.96 (s, 3H).  $^{13}\text{C}\{^1\text{H}\}$  NMR (101 MHz, Chloroform- $d$ )  $\delta$  162.3, 146.4, 145.7, 144.7, 143.3, 137.5, 136.5, 134.6, 134.5, 133.0, 132.0, 131.9, 129.92, 129.88, 129.4, 128.6, 129.0, 128.0, 127.48, 127.46, 127.3, 127.1, 126.39, 126.36, 125.5, 125.4, 125.0, 120.6, 120.3, 120.1, 21.3. HRMS (ESI-TOF)  $m/z$ :  $[\text{M} + \text{H}]^+$  Calcd for  $\text{C}_{33}\text{H}_{23}\text{N}_2\text{O}_3\text{S}$ , 527.1424, Found: 527.1429.

**6-(thiophen-2-yl)-5-tosyl-12H-quinolino[2,1-*b*]quinazolin-12-one (3ac)**

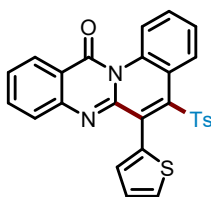

Purification by silica gel column chromatography (PE:EA, 5:1, v/v) to provide **3ac**. Yellow solid (21.8 mg, 45% yield), mp 133 – 135 °C.  $^1\text{H}$  NMR (400 MHz, Chloroform- $d$ )  $\delta$  8.92 (dd,  $J = 8.6, 1.2$  Hz, 1H), 8.68 (dd,  $J = 8.1, 1.5$  Hz, 1H), 8.44 (dd,  $J = 8.0, 1.4$  Hz, 1H), 7.78 (td,  $J = 7.6, 7.0, 1.5$  Hz, 1H), 7.69 (d,  $J = 8.1$  Hz, 1H), 7.61 – 7.47 (m, 5H), 7.31 (d,  $J = 8.1$  Hz, 2H), 7.05 (dd,  $J = 8.5, 6.3$  Hz, 3H), 2.32 (s, 3H).  $^{13}\text{C}\{^1\text{H}\}$  NMR (101 MHz, Chloroform- $d$ )  $\delta$  162.0, 146.6, 145.6, 143.82, 143.79, 137.7, 135.6, 134.8, 133.4, 133.4, 133.1, 132.6, 129.2, 129.0, 127.8, 127.8, 127.7, 127.5, 126.9, 126.5, 125.5, 121.4, 121.2, 120.4, 21.6. HRMS (ESI-TOF)  $m/z$ :  $[\text{M} + \text{H}]^+$  Calcd for  $\text{C}_{27}\text{H}_{18}\text{N}_2\text{NaO}_3\text{S}_2$ , 505.0651, Found: 505.0651.

**4-((12-Oxo-6-phenyl-12H-quinolino[2,1-*b*]quinazolin-5-yl)sulfonyl)phenyl dipropylsulfamoyl)benzoate (3ae)**

**4-(*N,N*-**

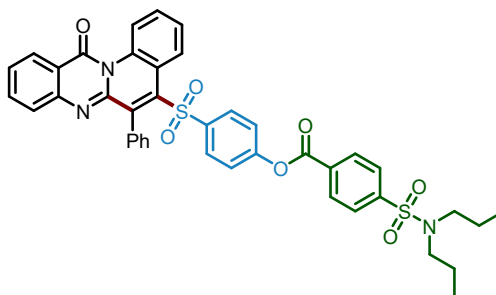

Purification by silica gel column chromatography (PE:EA, 3:1, v/v) to provide **3ae**. Yellow solid (29.8 mg, 40% yield), mp 89 – 91 °C. <sup>1</sup>H NMR (400 MHz, Chloroform-*d*) δ 9.01 (dd, *J* = 8.6, 1.3 Hz, 1H), 8.79 (dd, *J* = 8.1, 1.6 Hz, 1H), 8.43 (dd, *J* = 8.0, 1.5 Hz, 1H), 8.29 (d, *J* = 8.5 Hz, 2H), 7.96 (d, *J* = 8.5 Hz, 2H), 7.78 – 7.69 (m, 1H), 7.66 – 7.59 (m, 1H), 7.59 – 7.49 (m, 3H), 7.49 – 7.41 (m, 2H), 7.40 – 7.33 (m, 1H), 7.31 – 7.22 (m, 3H), 7.13 – 7.02 (m, 4H), 3.45 – 2.92 (m, 4H), 1.79 – 1.34 (m, 4H), 0.88 (t, *J* = 7.4 Hz, 6H). <sup>13</sup>C{<sup>1</sup>H} NMR (101 MHz, CDCl<sub>3</sub>) δ 162.9, 162.1, 153.9, 146.8, 145.8, 145.7, 145.49, 145.45, 142.9, 139.5, 139.0, 134.7, 134.0, 133.3, 132.11, 131.99, 130.9, 129.2, 128.9, 128.1, 127.7, 127.7, 127.3, 126.9, 126.4, 122.0, 120.9, 120.5, 120.3, 49.9, 21.9, 11.2. HRMS (ESI-TOF) *m/z*: [M + H]<sup>+</sup> Calcd for C<sub>41</sub>H<sub>36</sub>N<sub>3</sub>O<sub>7</sub>S<sub>2</sub>, 746.1989, Found: 746.1996.

**4-((12-Oxo-6-phenyl-12H-quinolino[2,1-*b*]quinazolin-5-yl)sulfonyl)phenyl** **2-(4-isobutylphenyl)propanoate (3af)**

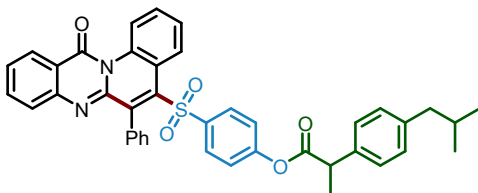

Purification by silica gel column chromatography (PE:EA, 3:1, v/v) to provide **3af**. Yellow solid (43.3 mg, 65% yield), mp 119 – 121 °C. <sup>1</sup>H NMR (400 MHz, Chloroform-*d*) δ 8.98 (dd, *J* = 8.6, 1.2 Hz, 1H), 8.75 (dd, *J* = 8.2, 1.5 Hz, 1H), 8.41 (dd, *J* = 8.0, 1.4 Hz, 1H), 7.75 – 7.66 (m, 1H), 7.63 – 7.56 (m, 1H), 7.51 (d, *J* = 84.8 Hz, 3H), 7.35 – 7.11 (m, 9H), 7.06 – 7.00 (m, 2H), 6.85 – 6.76 (m, 2H), 3.91 (q, *J* = 7.1 Hz, 1H), 2.47 (d, *J* = 7.1 Hz, 2H), 1.94 – 1.79 (m, 1H), 1.59 (d, *J* = 7.1 Hz, 3H), 0.90 (d, *J* = 6.6 Hz, 6H). <sup>13</sup>C{<sup>1</sup>H} NMR (101 MHz, Chloroform-*d*) δ 172.2, 162.1, 154.3, 146.8, 145.8, 142.9, 141.1, 139.5, 138.2, 136.7, 134.6, 134.1, 133.3, 132.0, 129.6, 129.1, 129.0, 128.8, 128.1, 127.64, 127.57, 127.3, 127.1, 126.9, 126.4, 121.8, 120.9, 120.5, 120.3, 45.3, 45.0, 30.2, 22.4, 18.4. HRMS (ESI-TOF) *m/z*: [M + H]<sup>+</sup> Calcd for C<sub>41</sub>H<sub>35</sub>N<sub>2</sub>O<sub>5</sub>S, 667.2261, Found: 667.2271.

**4-((12-Oxo-6-phenyl-12H-quinolino[2,1-*b*]quinazolin-5-yl)sulfonyl)phenyl** **-2-(6-methoxynaphthalen-2-yl)propanoate (3ag)**

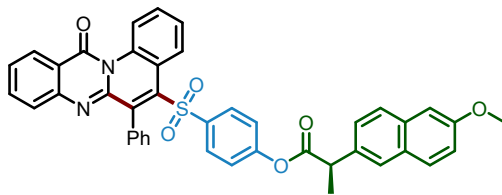

Purification by silica gel column chromatography (PE:EA, 3:1, v/v) to provide **3ag**. Yellow solid (37.9 mg, 55% yield), mp 107 – 109 °C.  $^1\text{H}$  NMR (400 MHz, Chloroform-*d*)  $\delta$  8.98 (d,  $J$  = 8.6 Hz, 1H), 8.75 (d,  $J$  = 8.2 Hz, 1H), 8.41 (d,  $J$  = 8.0 Hz, 1H), 7.83 – 7.67 (m, 4H), 7.63 – 7.38 (m, 6H), 7.28 (dd,  $J$  = 16.1, 8.3 Hz, 4H), 7.22 – 7.10 (m, 4H), 7.03 (d,  $J$  = 7.6 Hz, 2H), 6.80 (d,  $J$  = 8.4 Hz, 2H), 4.07 (q,  $J$  = 6.9 Hz, 1H), 3.92 (s, 3H), 1.68 (d,  $J$  = 7.1 Hz, 3H).  $^{13}\text{C}\{^1\text{H}\}$  NMR (101 MHz, Chloroform-*d*)  $\delta$  172.2, 162.1, 157.9, 154.2, 146.8, 145.7, 142.9, 139.5, 138.3, 134.6, 134.5, 134.0, 133.9, 133.3, 132.0, 129.3, 129.1, 129.0, 128.8, 128.1, 127.7, 127.6, 127.3, 126.9, 126.4, 126.2, 125.9, 121.8, 120.9, 120.5, 120.3, 119.3, 105.6, 55.4, 45.6, 18.4. HRMS (ESI-TOF)  $m/z$ :  $[\text{M} + \text{H}]^+$  Calcd for  $\text{C}_{42}\text{H}_{31}\text{N}_2\text{O}_6\text{S}$ , 691.1897, Found: 691.1903.

#### 4. Copies of spectra of products

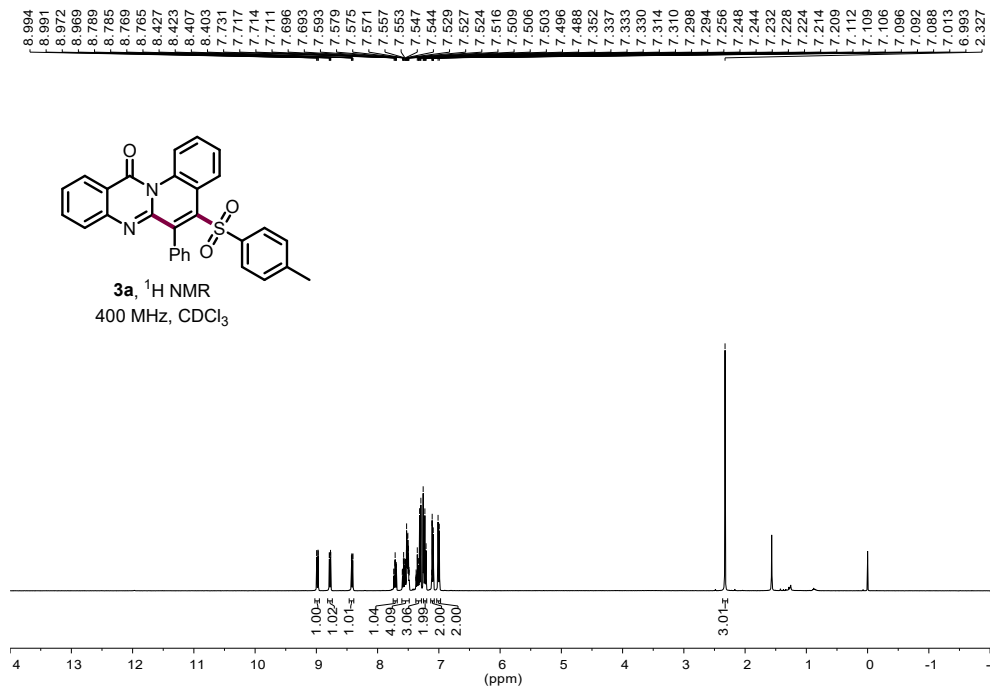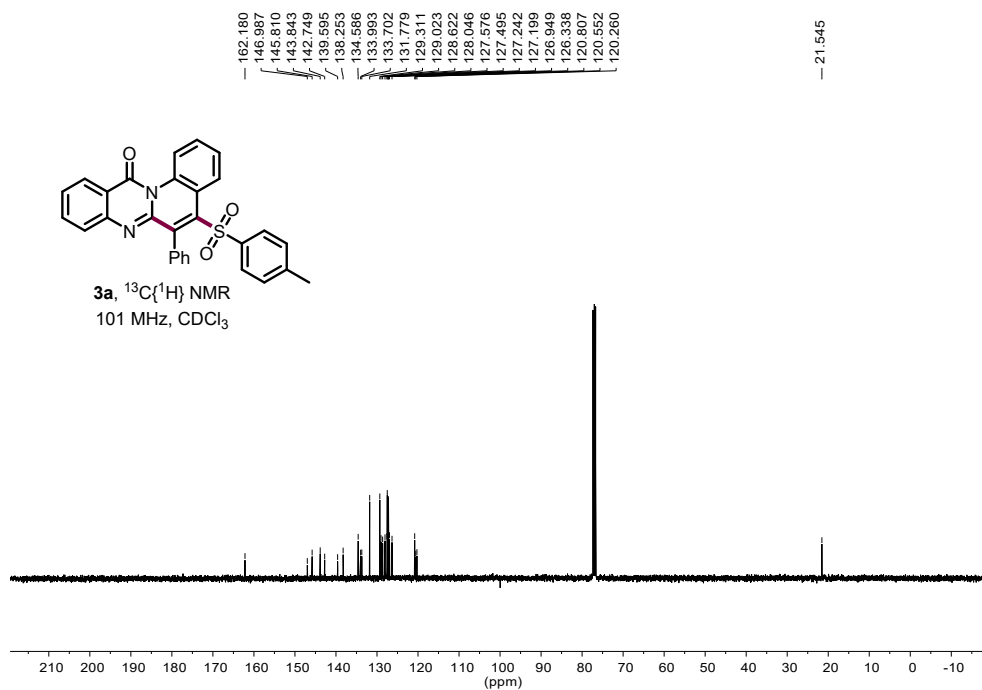

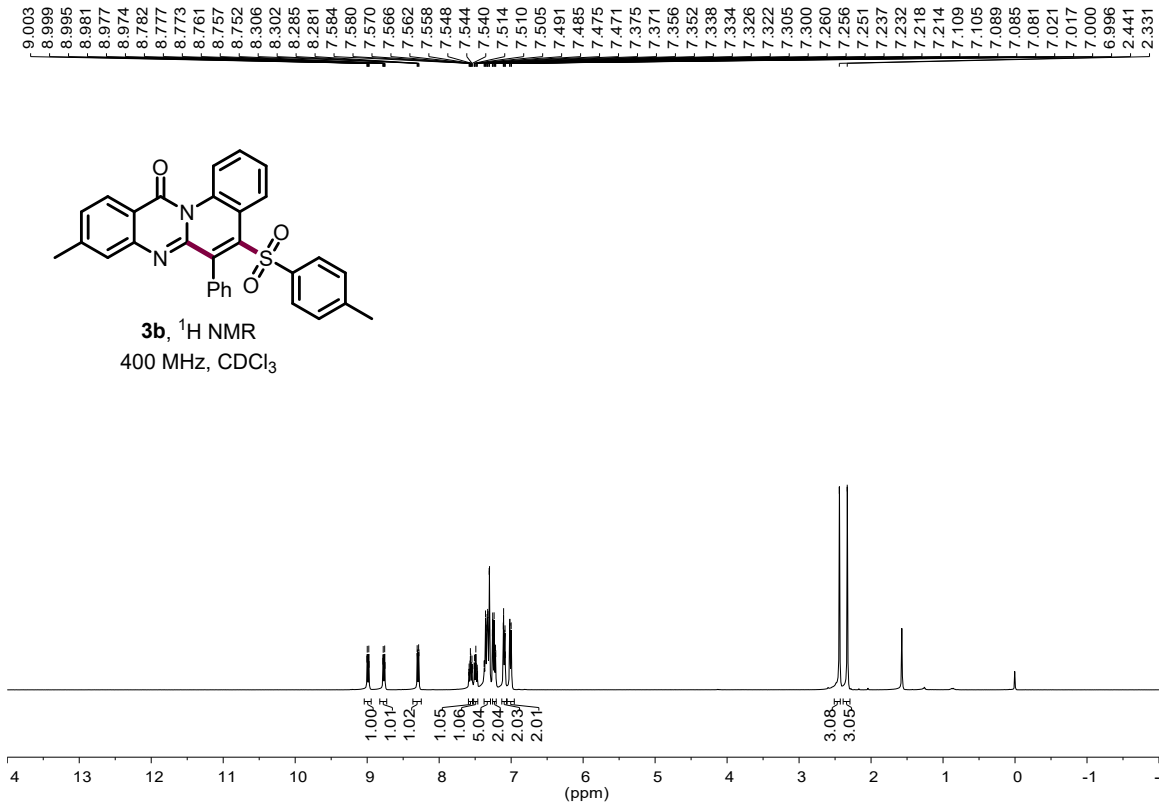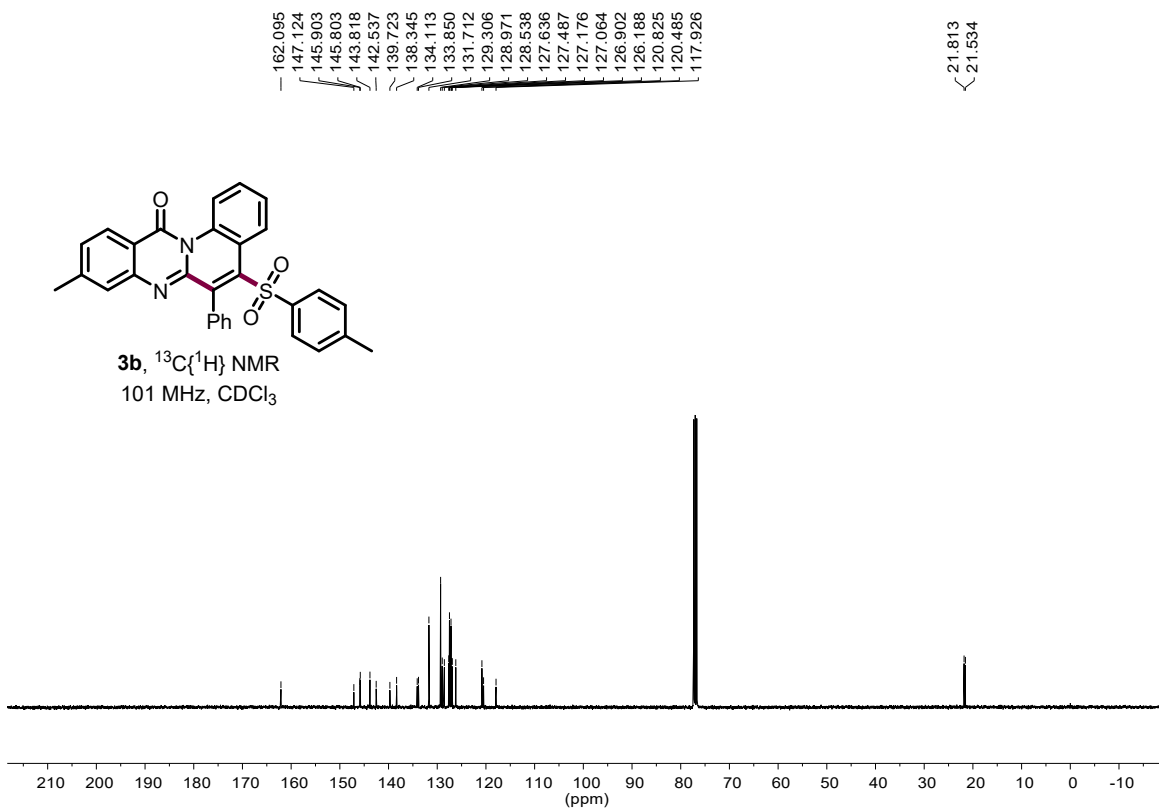

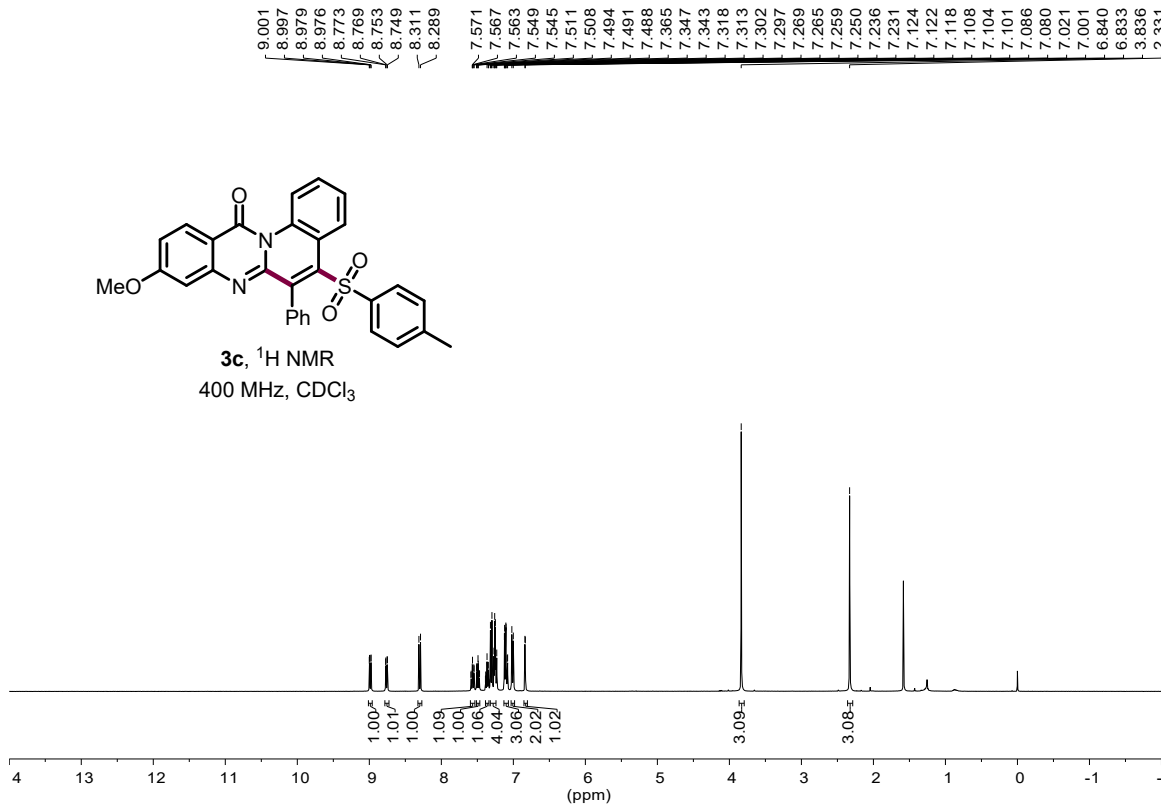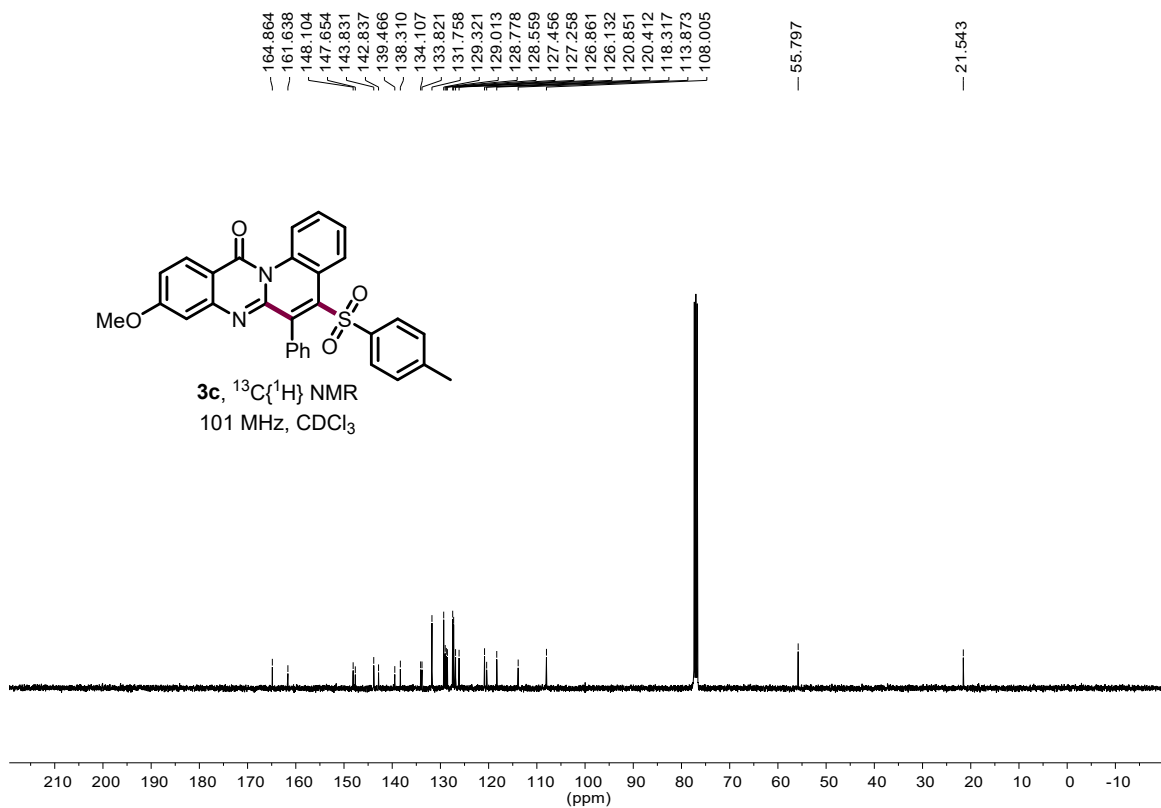

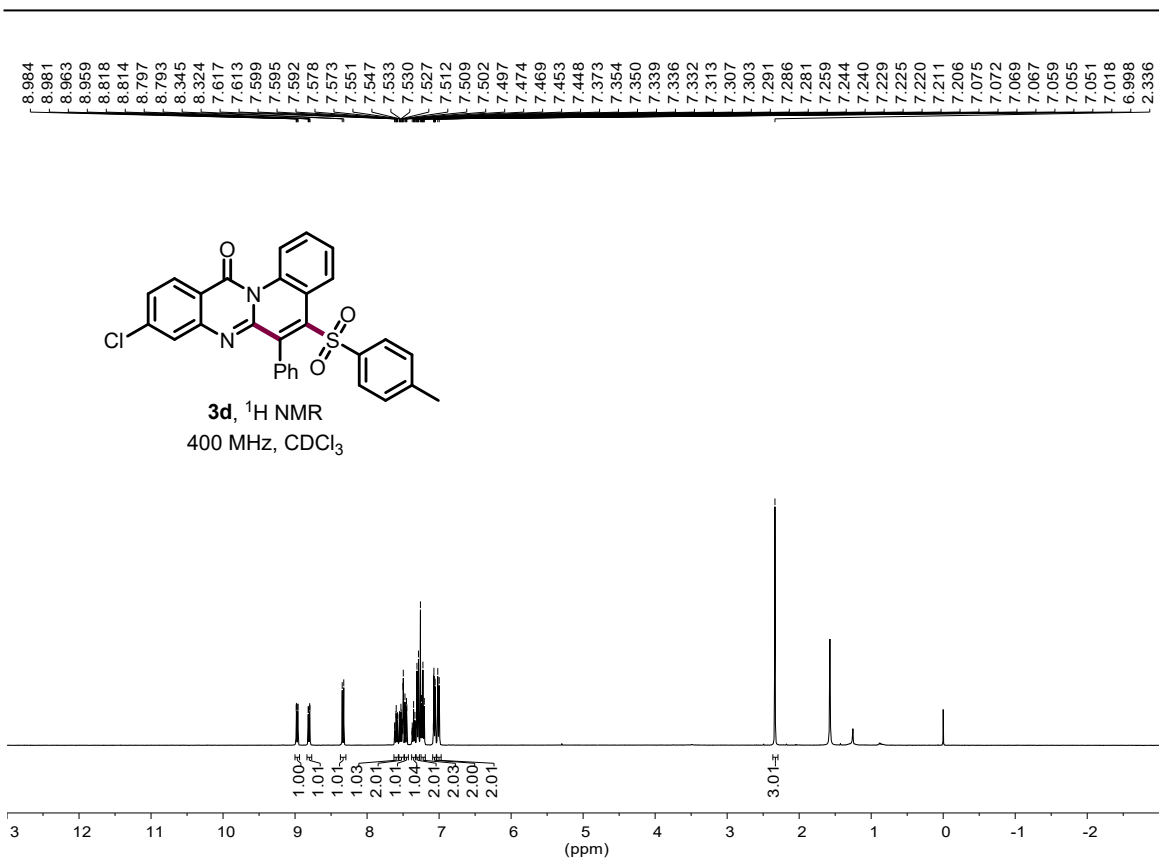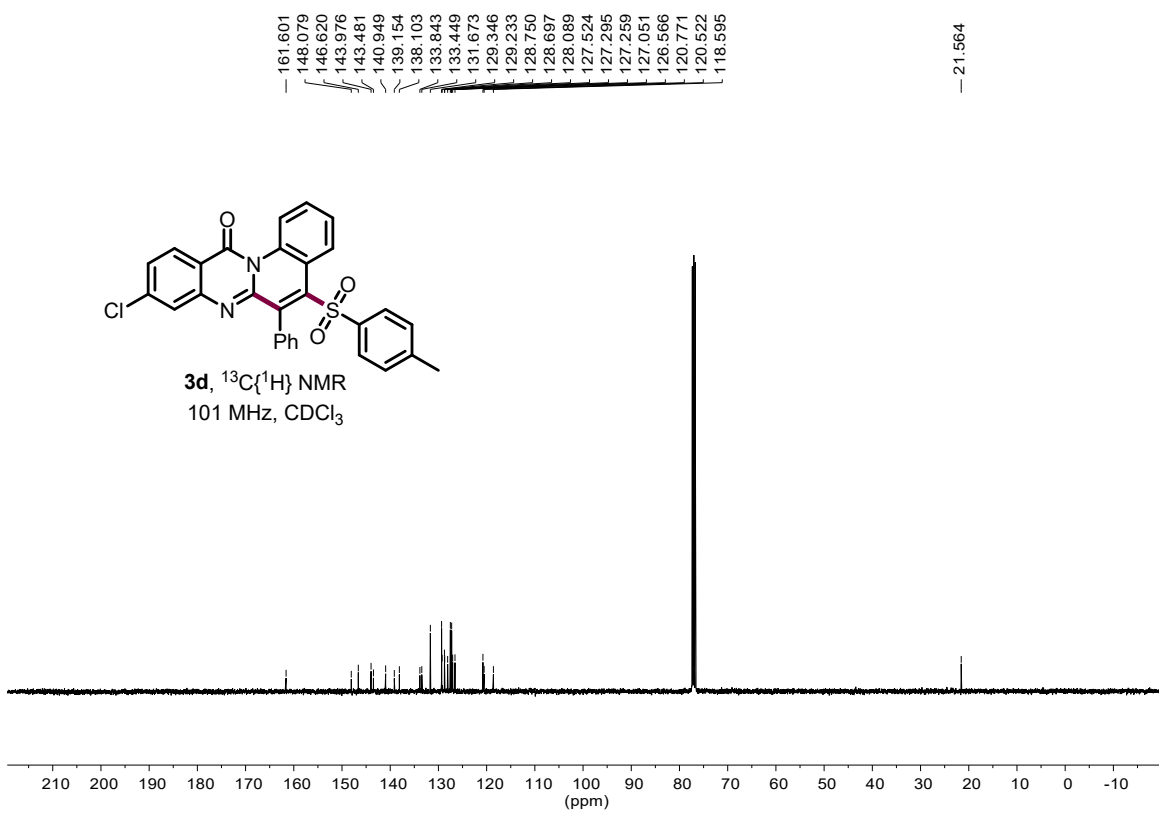



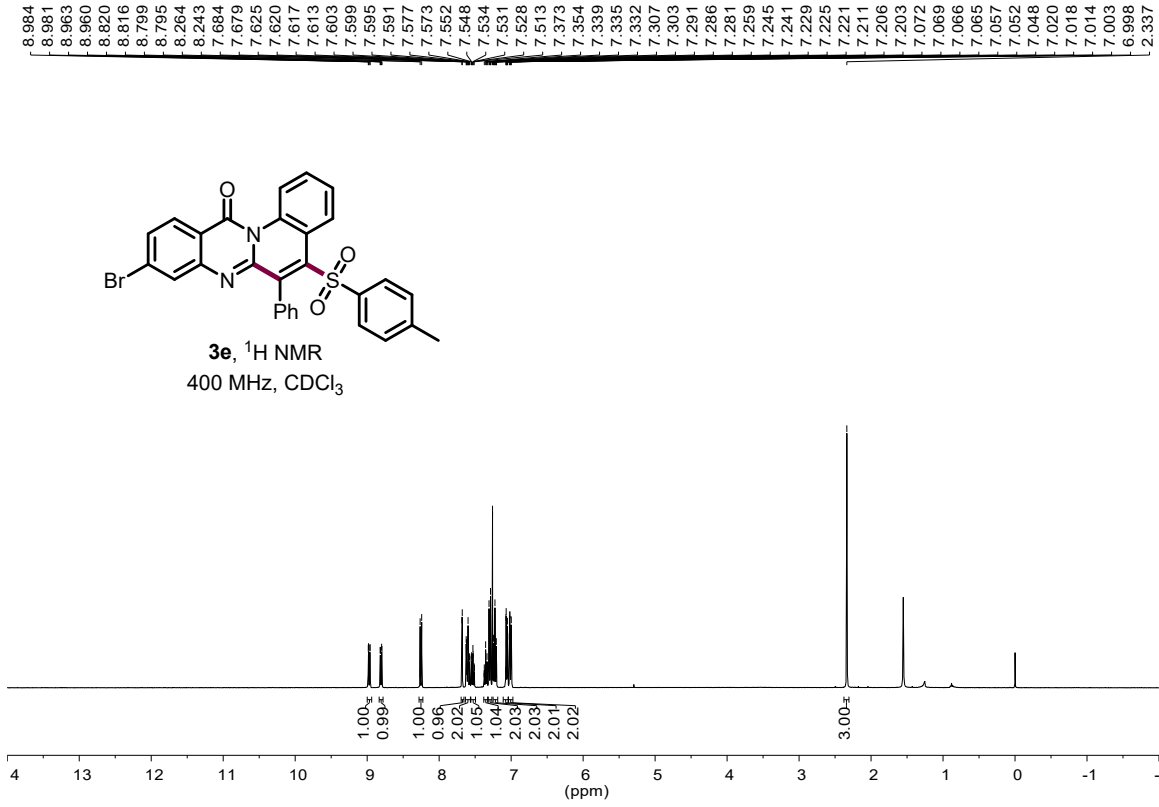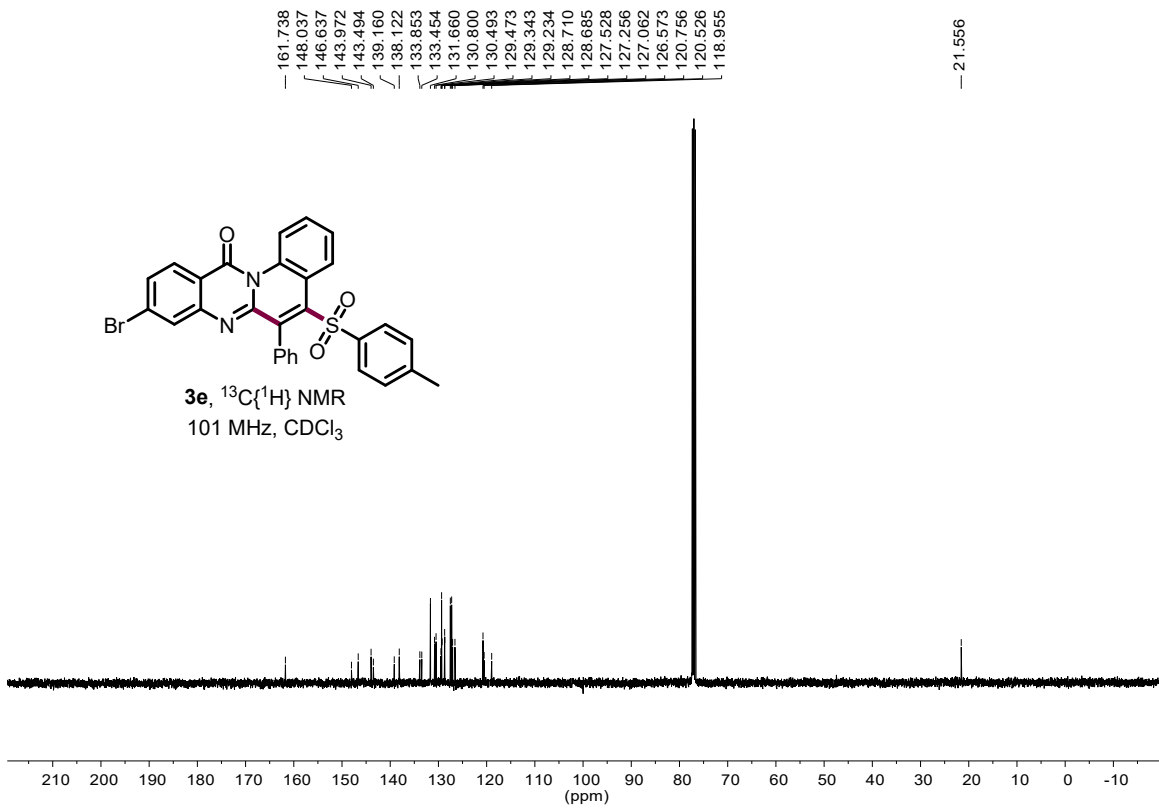

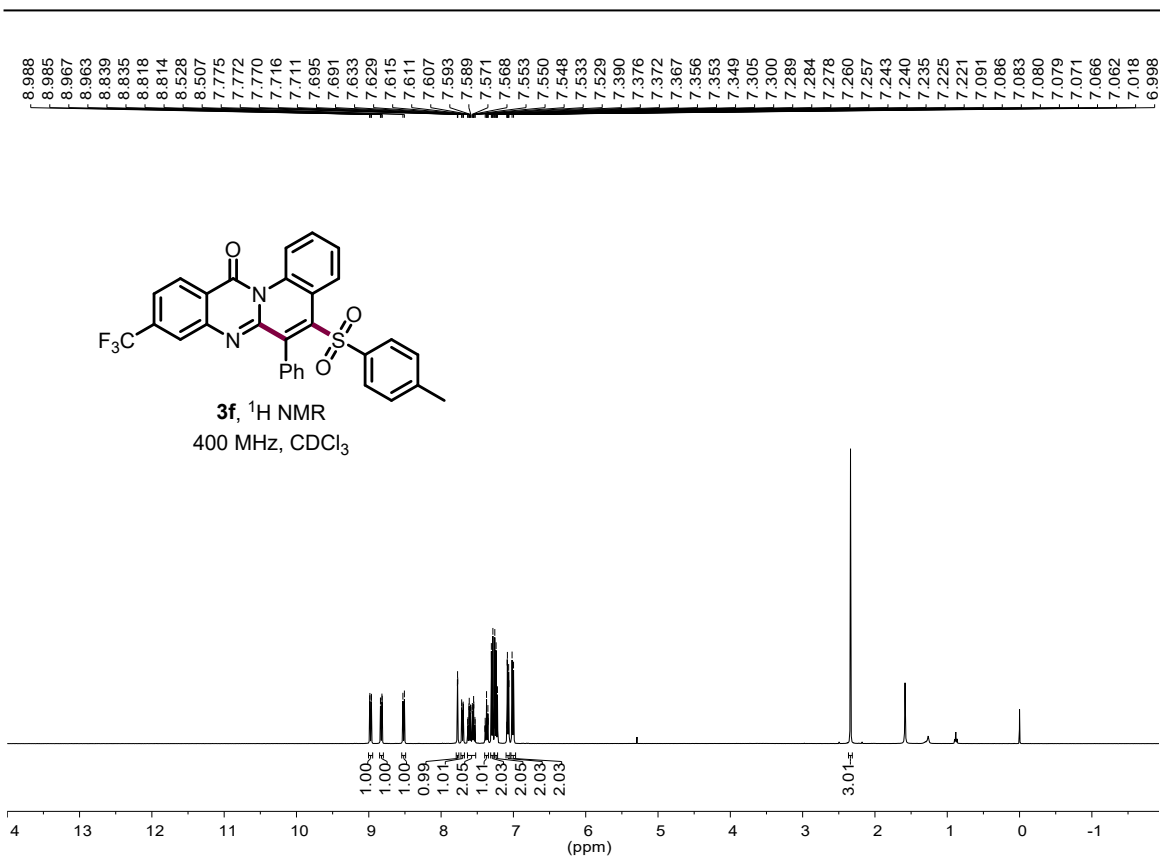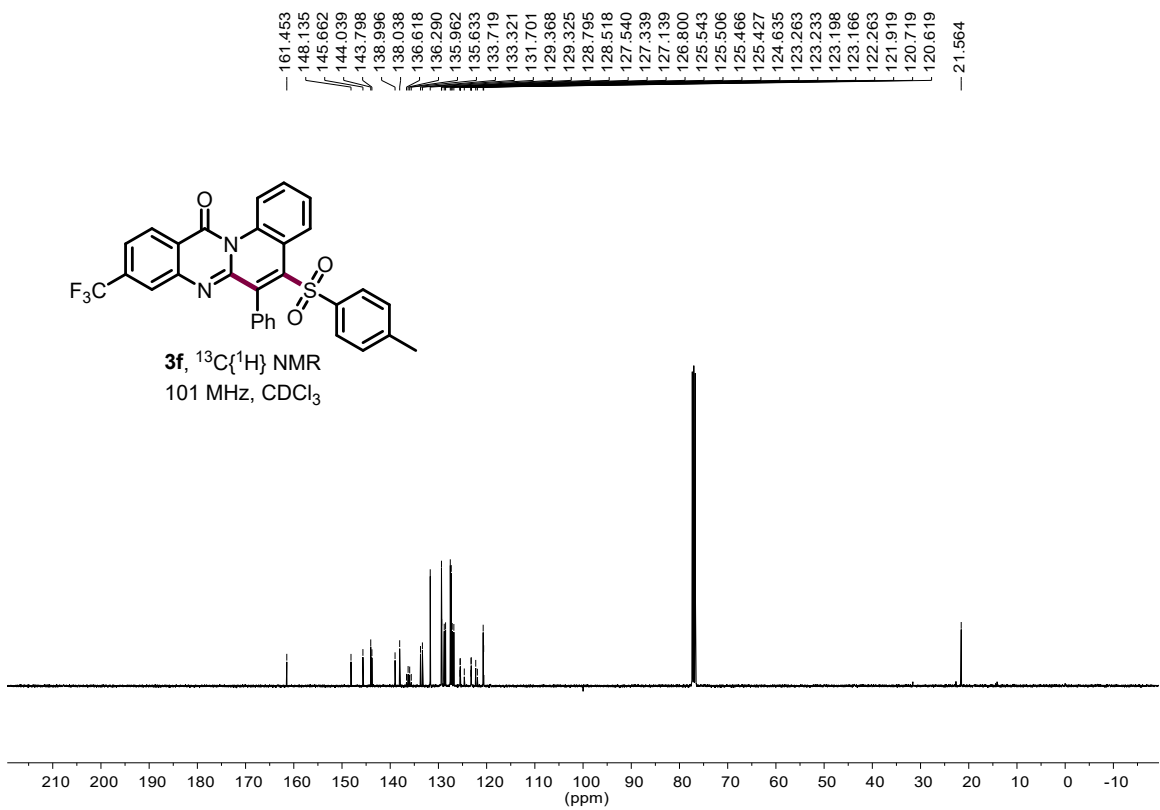

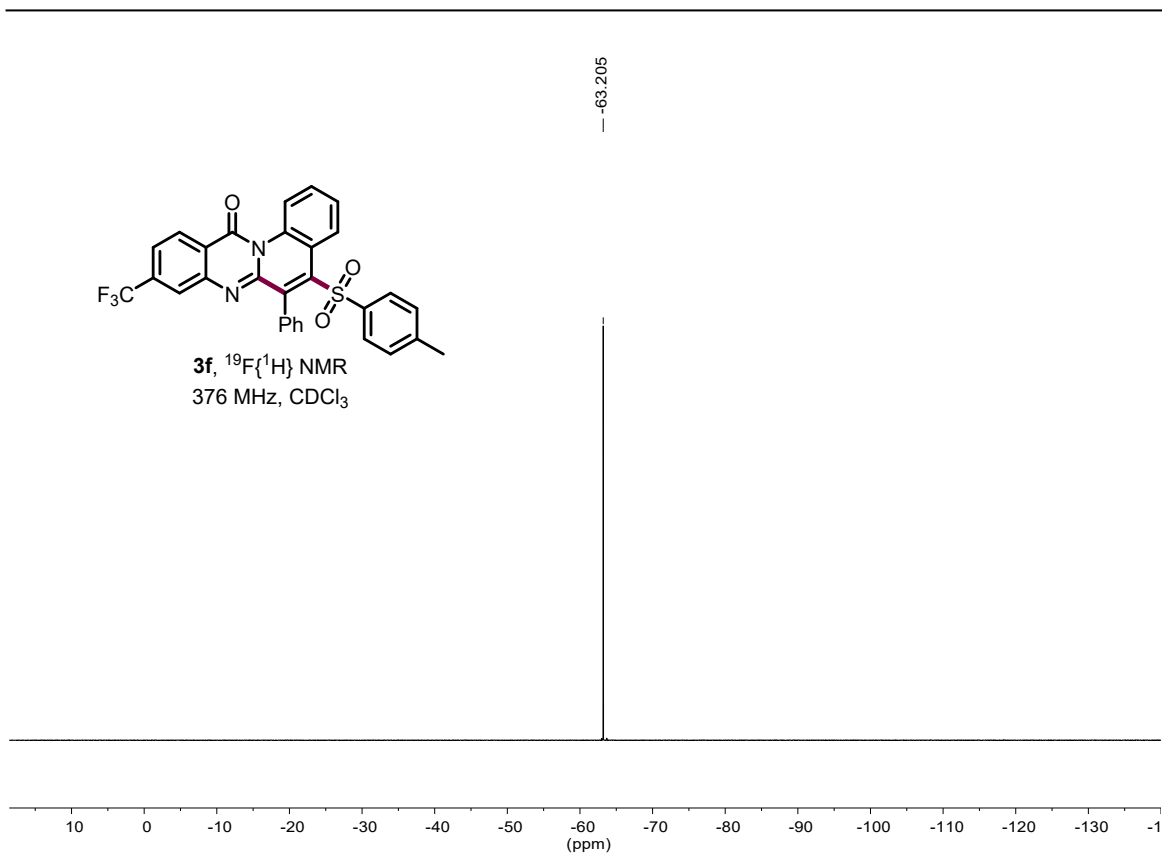

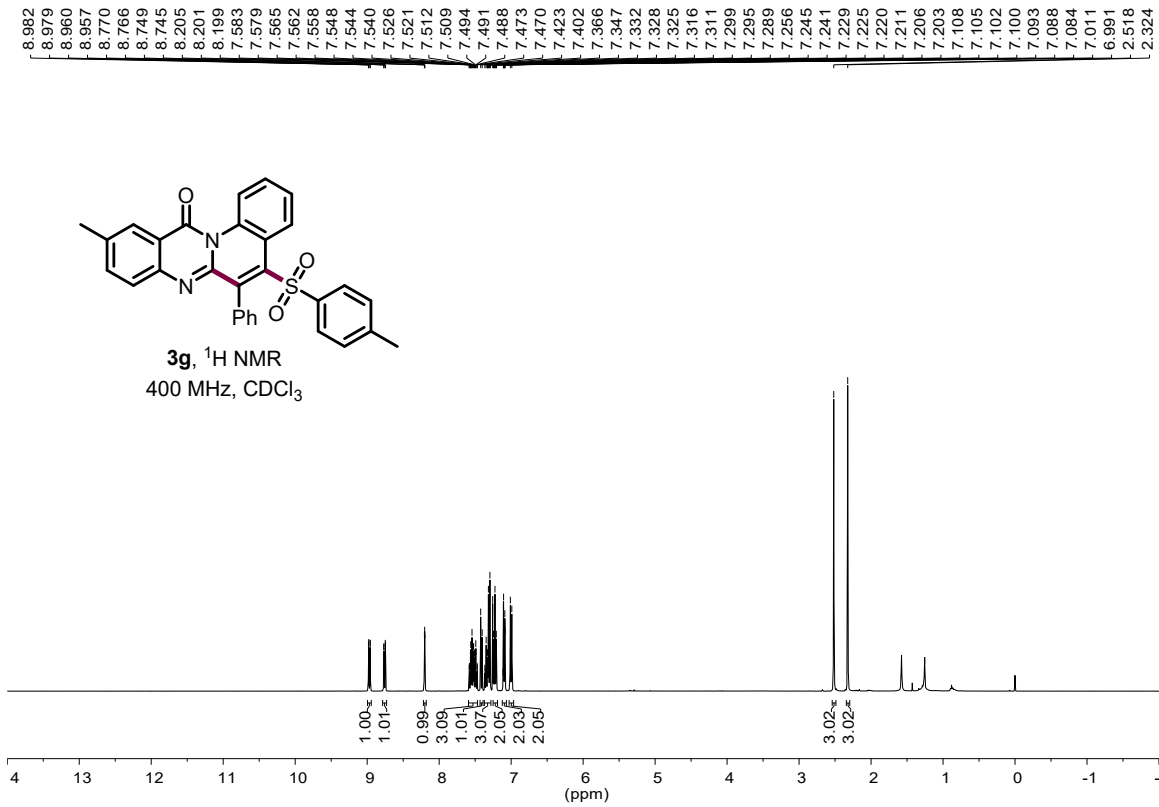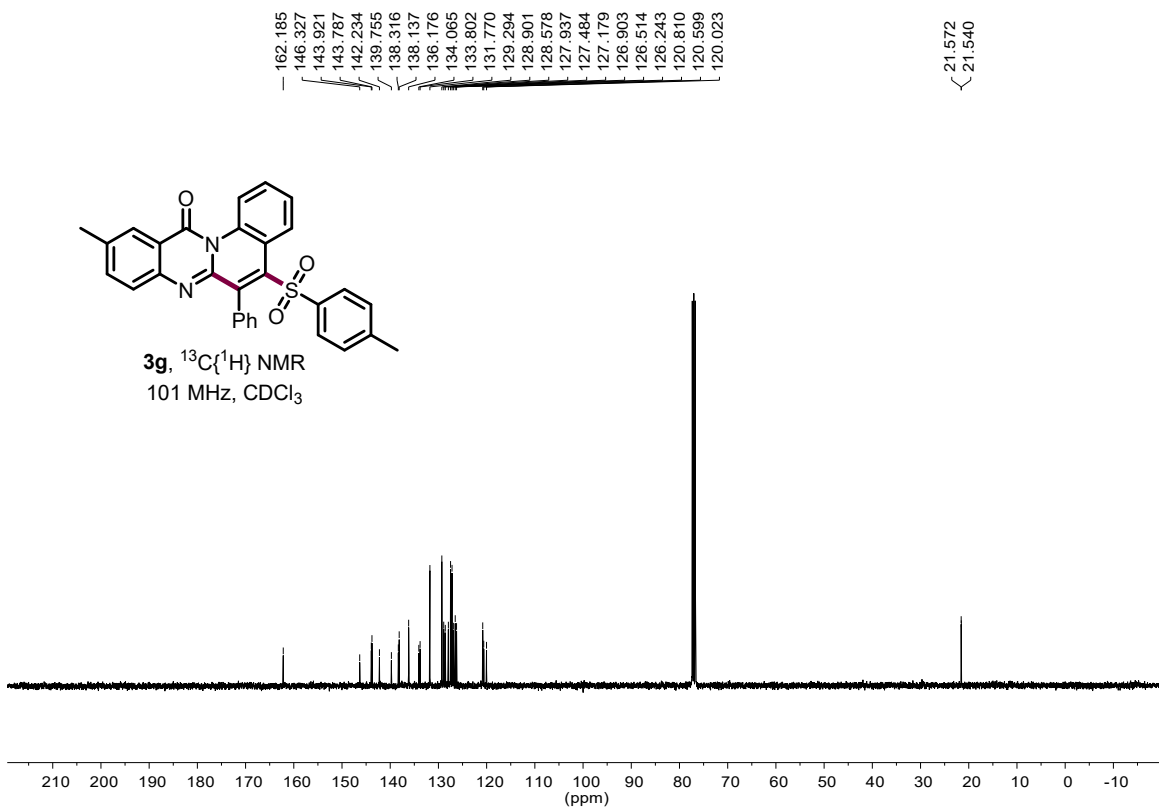

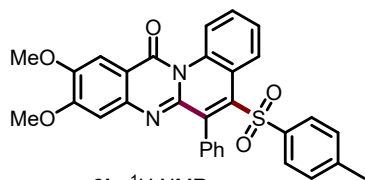

**3h**,  $^1\text{H}$  NMR  
400 MHz,  $\text{CDCl}_3$

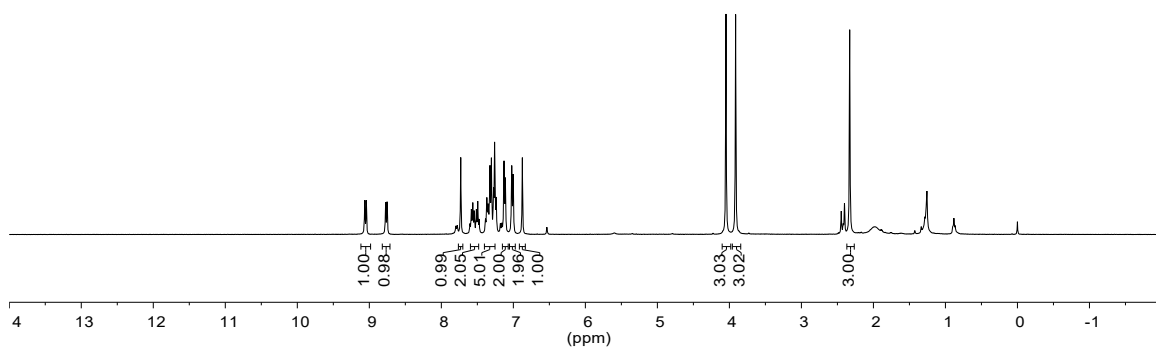

161.396  
155.441  
150.100  
145.962  
143.772  
142.392  
141.727  
139.604  
138.400  
134.079  
133.956  
131.743  
129.311  
128.763  
128.525  
127.431  
127.265  
126.795  
126.184  
120.865  
120.585  
113.980  
108.117  
105.767  
56.445  
56.444  
21.539

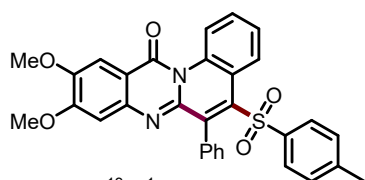

**3h**,  $^{13}\text{C}\{^1\text{H}\}$  NMR  
101 MHz,  $\text{CDCl}_3$

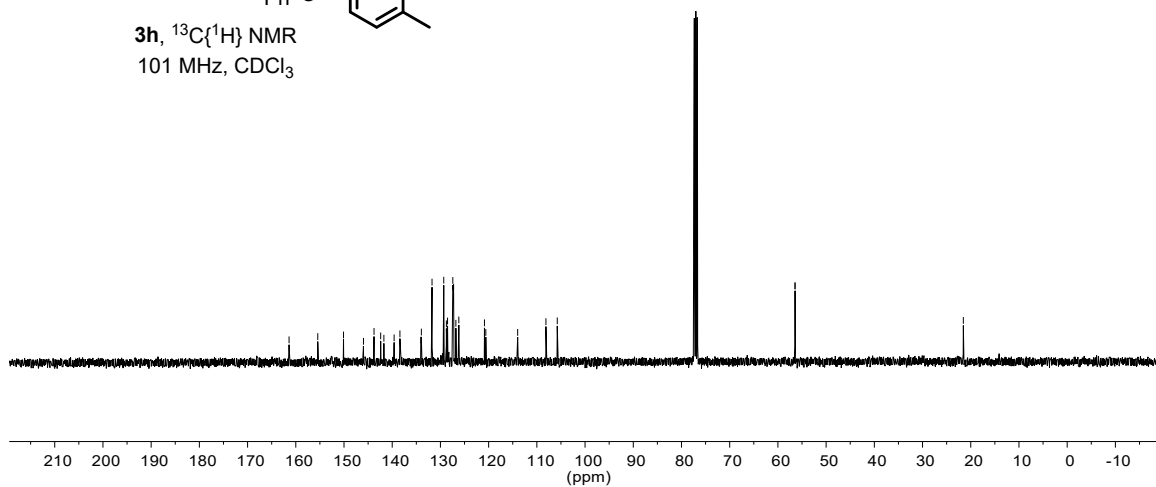

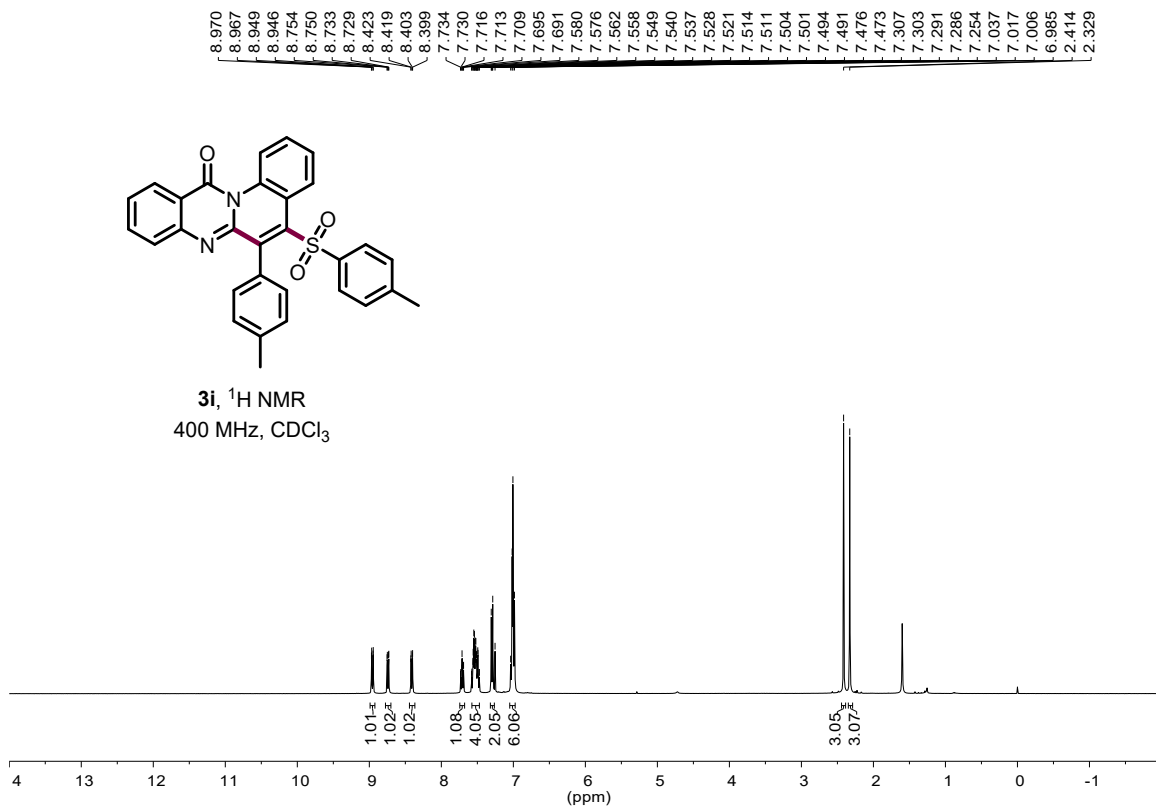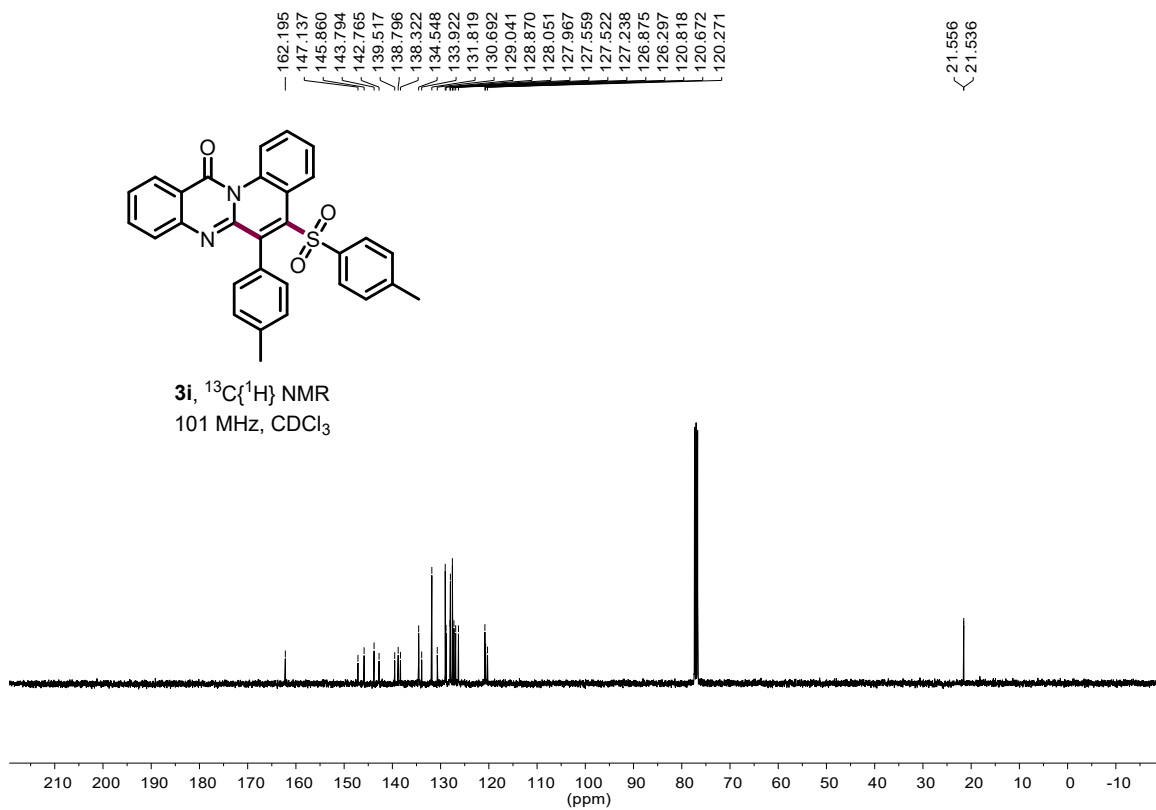

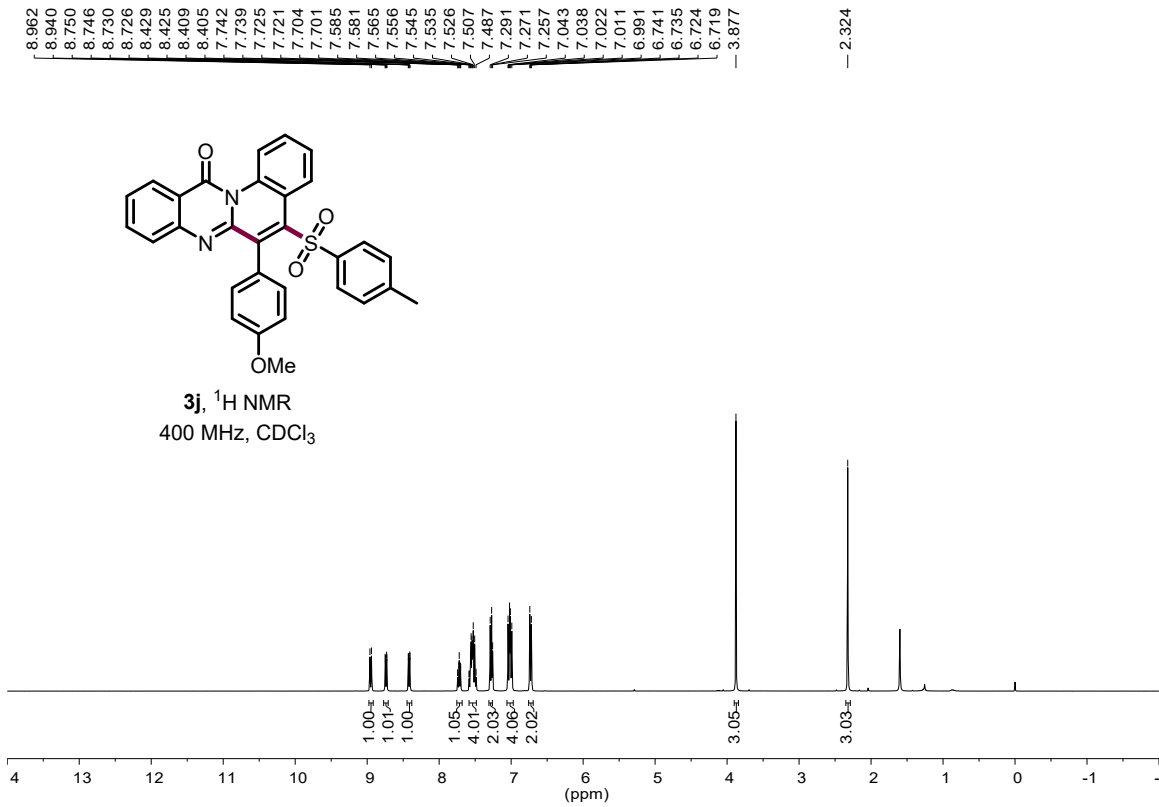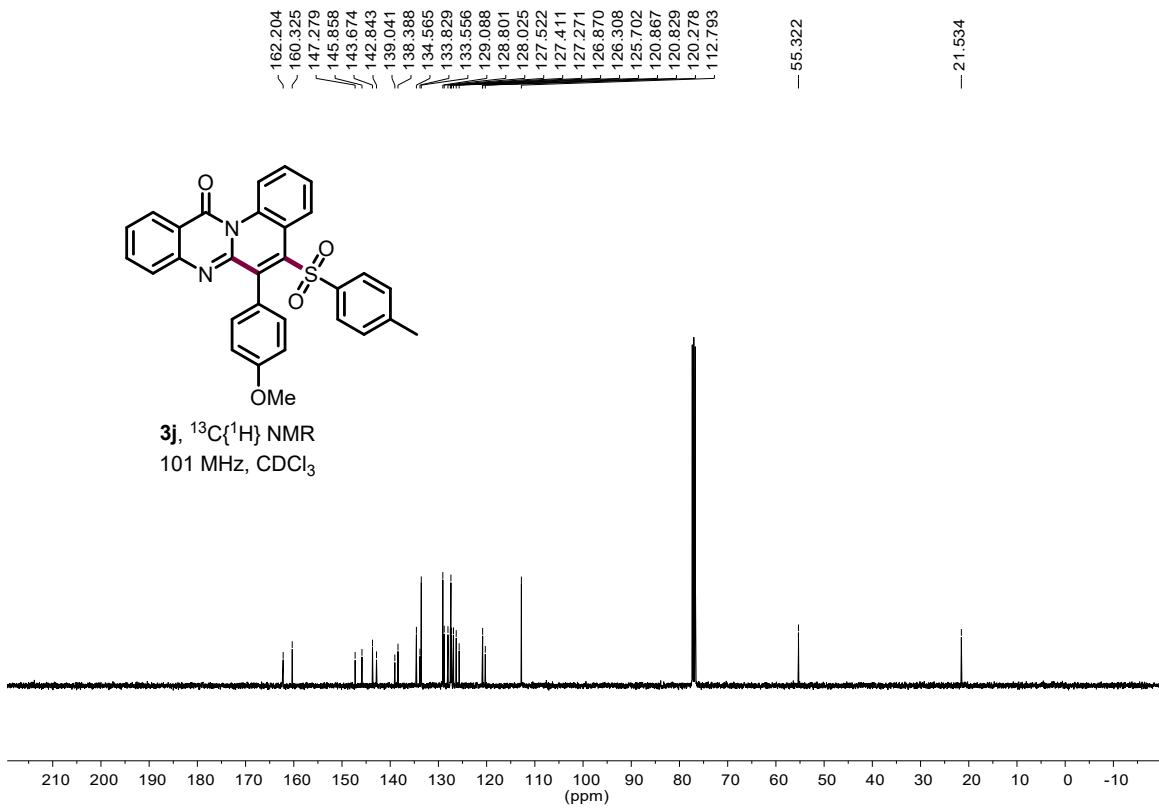

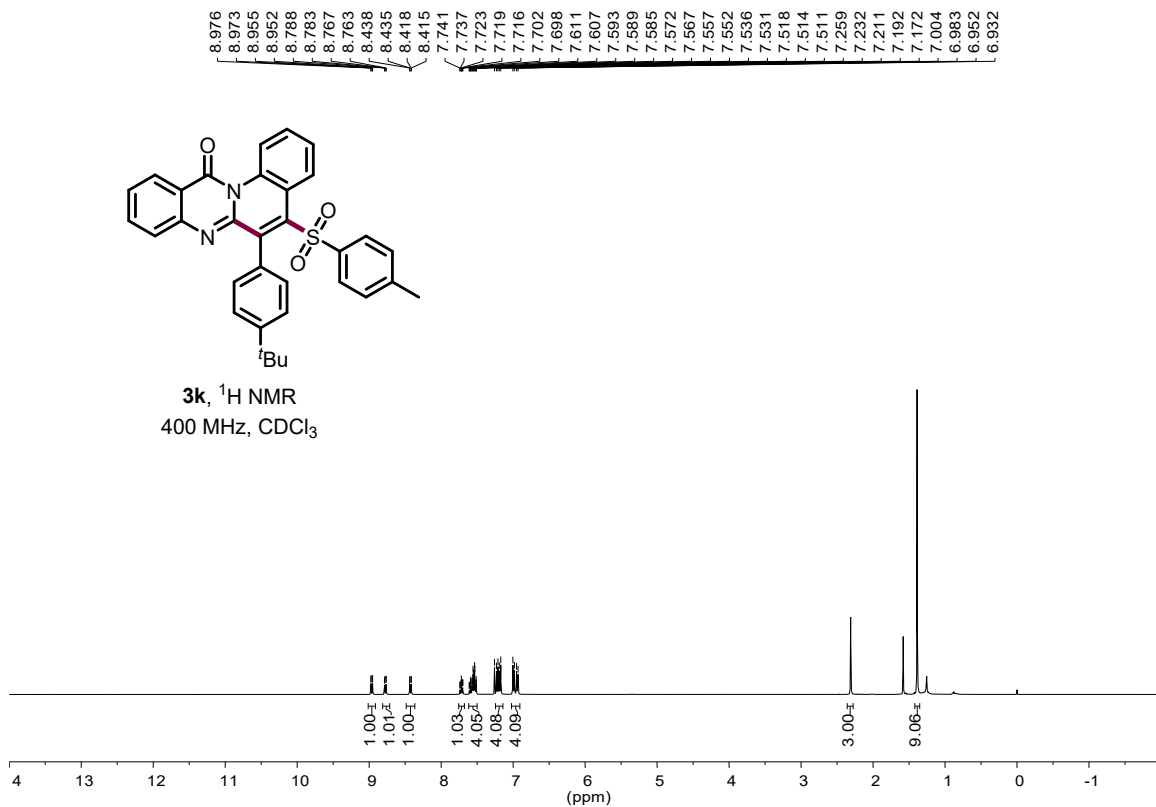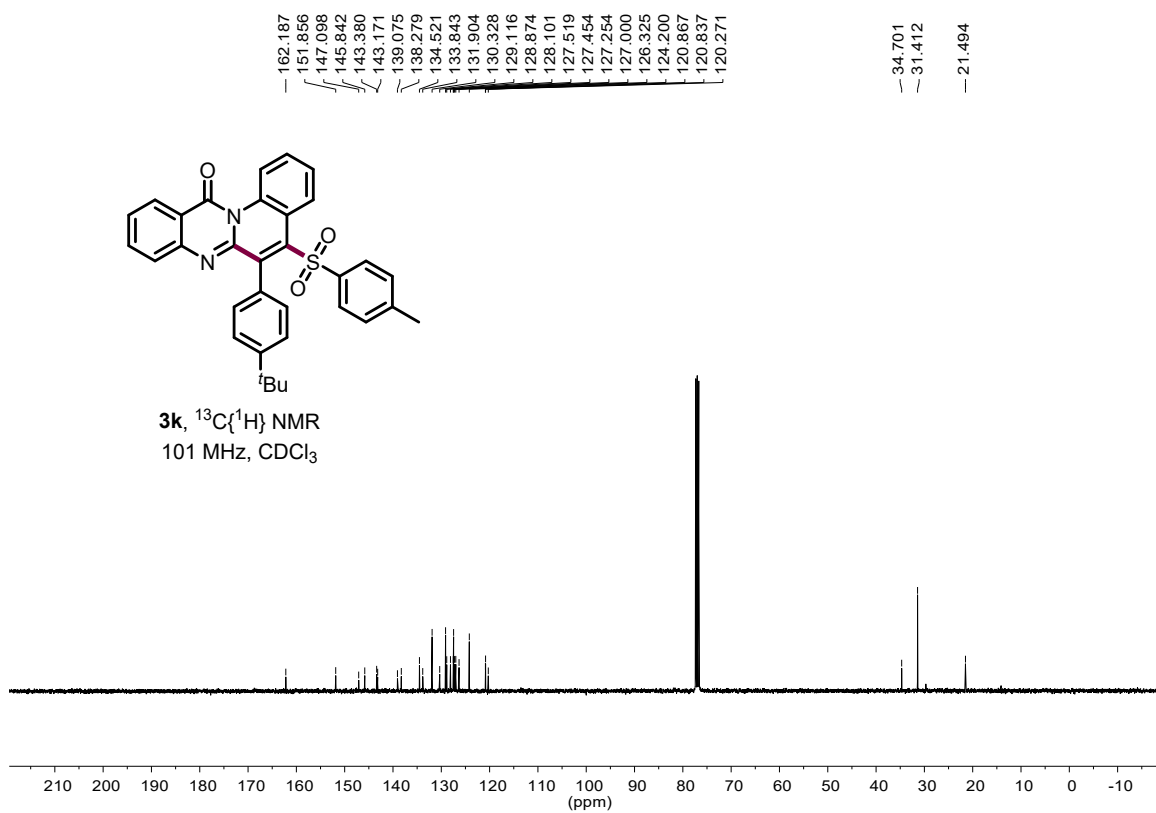



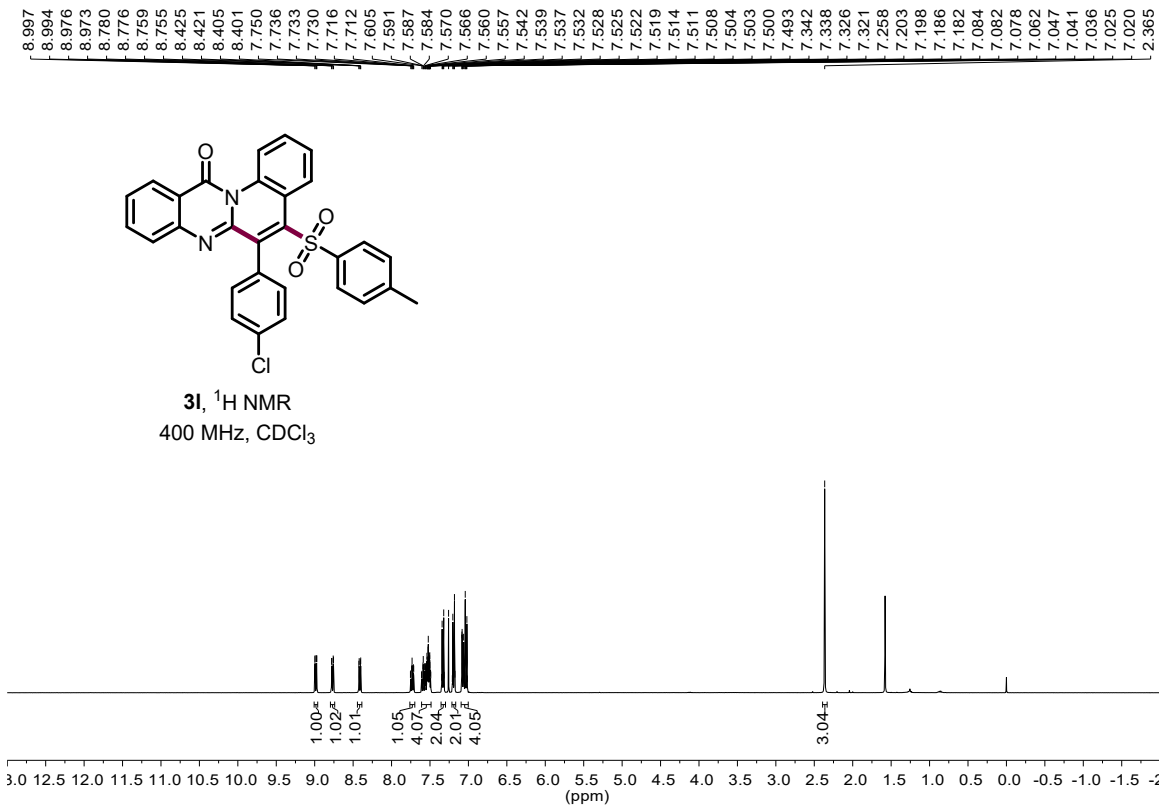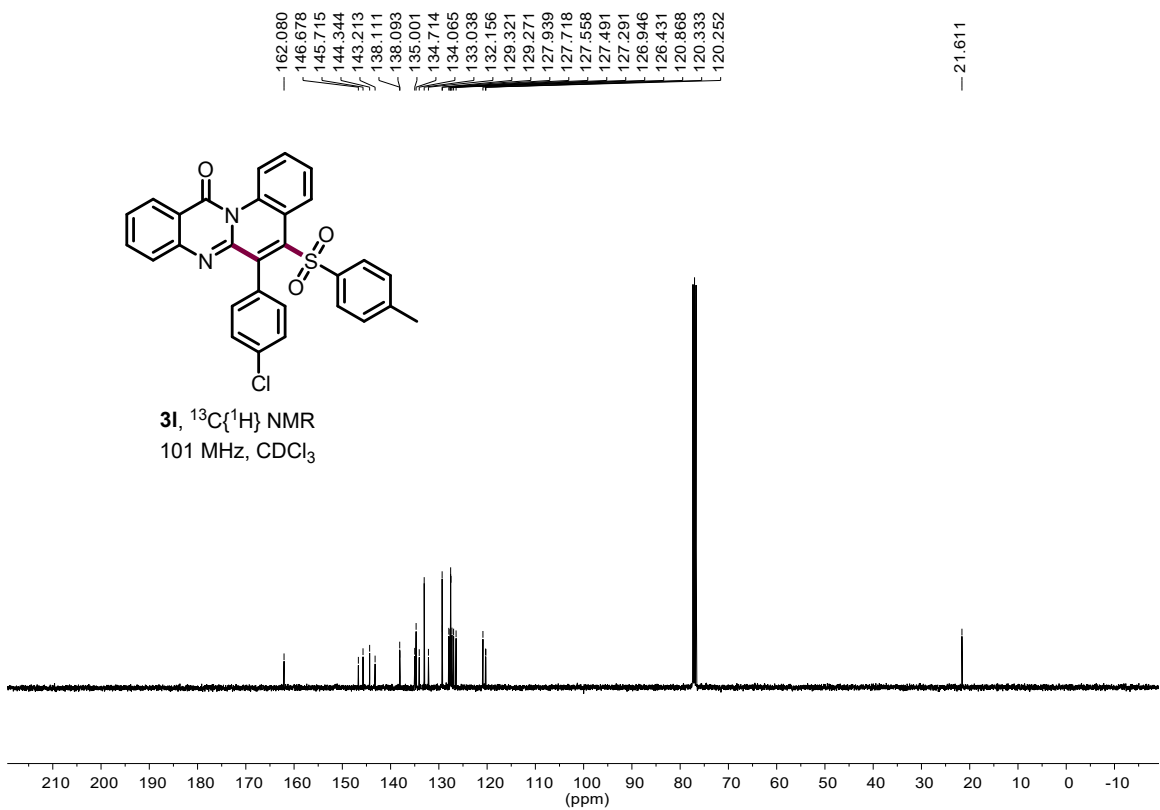

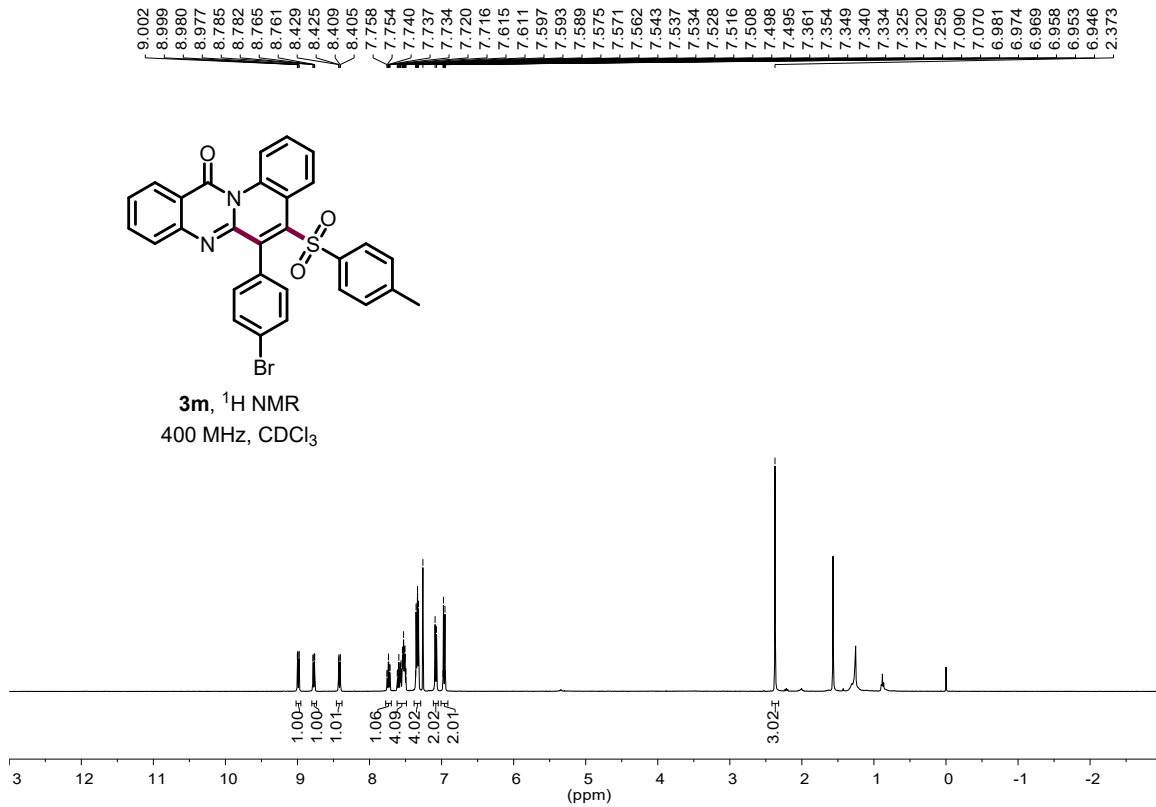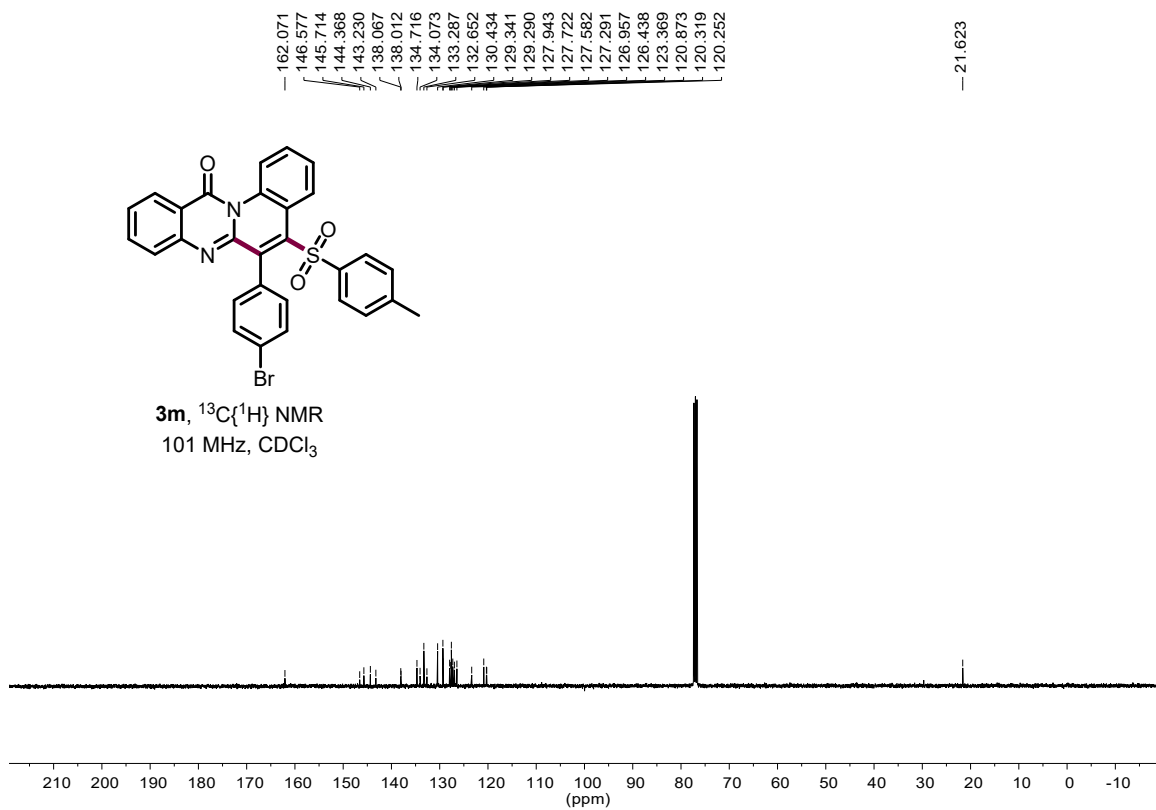

9.028  
9.025  
9.006  
9.003  
8.797  
8.793  
8.776  
8.772  
8.423  
8.420  
8.403  
8.399  
7.942  
7.921  
7.741  
7.727  
7.724  
7.721  
7.707  
7.703  
7.596  
7.592  
7.589  
7.574  
7.570  
7.560  
7.557  
7.542  
7.539  
7.537  
7.526  
7.522  
7.519  
7.508  
7.505  
7.502  
7.487  
7.484  
7.477  
7.474  
7.456  
7.454  
7.388  
7.383  
7.372  
7.367  
7.261  
7.221  
7.217  
7.212  
7.200  
7.196  
7.191  
7.056  
7.054  
7.051  
7.035  
7.033  
3.987  
2.351

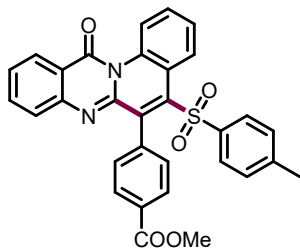

**3n**, <sup>1</sup>H NMR  
400 MHz, CDCl<sub>3</sub>

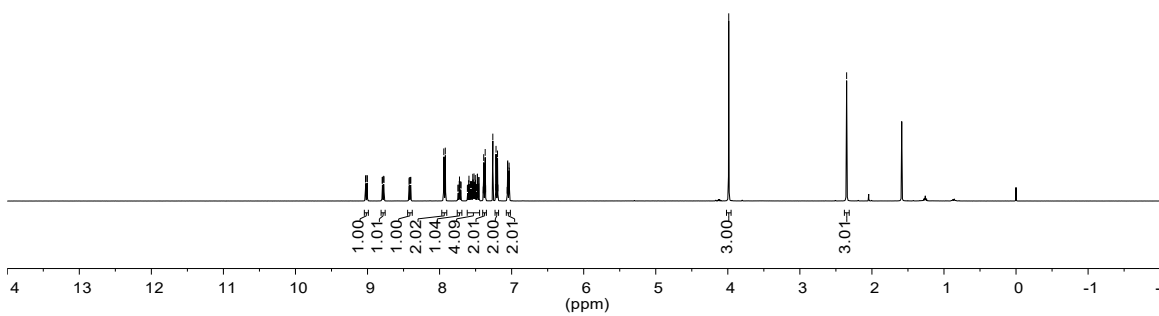

166.876  
162.077  
146.534  
145.672  
144.534  
142.741  
138.862  
138.725  
137.989  
134.735  
134.198  
131.425  
129.937  
129.483  
129.402  
128.356  
127.941  
127.756  
127.608  
127.263  
126.920  
126.444  
120.872  
120.250  
120.082  
52.253  
21.575

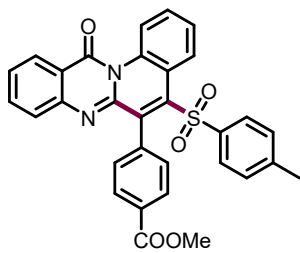

**3n**, <sup>13</sup>C{<sup>1</sup>H} NMR  
101 MHz, CDCl<sub>3</sub>

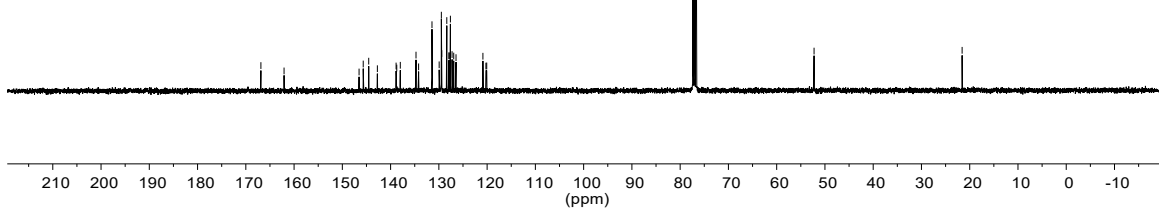

8.992  
8.988  
8.970  
8.967  
8.782  
8.778  
8.761  
8.757  
8.415  
8.411  
8.395  
8.391  
7.705  
7.702  
7.699  
7.685  
7.681  
7.579  
7.575  
7.558  
7.554  
7.537  
7.534  
7.527  
7.523  
7.519  
7.516  
7.514  
7.509  
7.506  
7.503  
7.497  
7.488  
7.484  
7.481  
7.414  
7.411  
7.408  
7.406  
7.399  
7.394  
7.390  
7.387  
7.371  
7.368  
7.332  
7.314  
7.251  
7.225  
7.221  
7.207  
7.204  
7.190  
7.186  
7.092  
7.089  
7.085  
7.076  
7.068

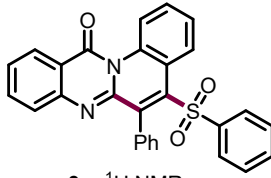

**3o**,  $^1\text{H}$  NMR  
400 MHz,  $\text{CDCl}_3$

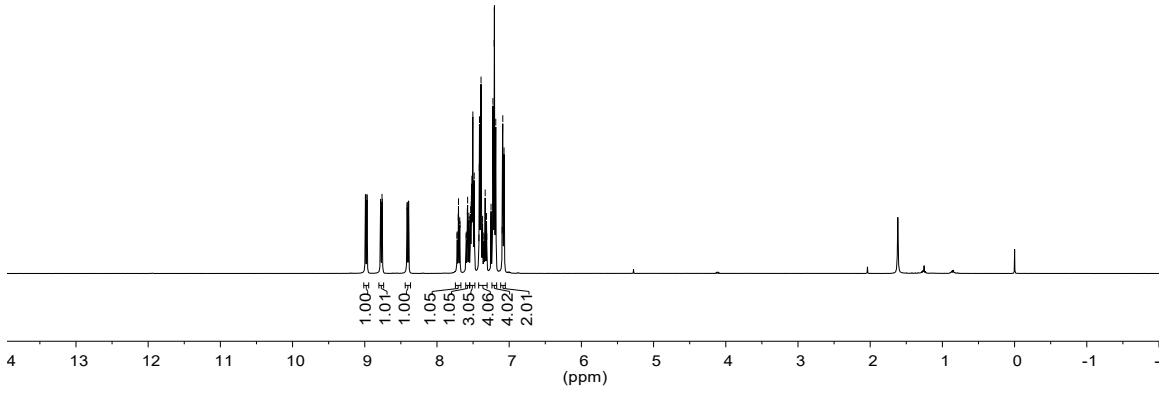

162.150  
146.896  
145.774  
142.551  
141.294  
139.740  
134.626  
134.015  
133.488  
132.804  
131.898  
129.109  
128.709  
128.043  
127.640  
127.379  
127.345  
127.249  
126.916  
126.375  
120.841  
120.491  
120.271

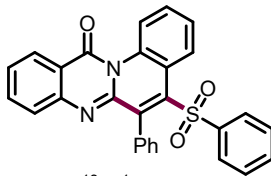

**3o**,  $^{13}\text{C}\{^1\text{H}\}$  NMR  
101 MHz,  $\text{CDCl}_3$

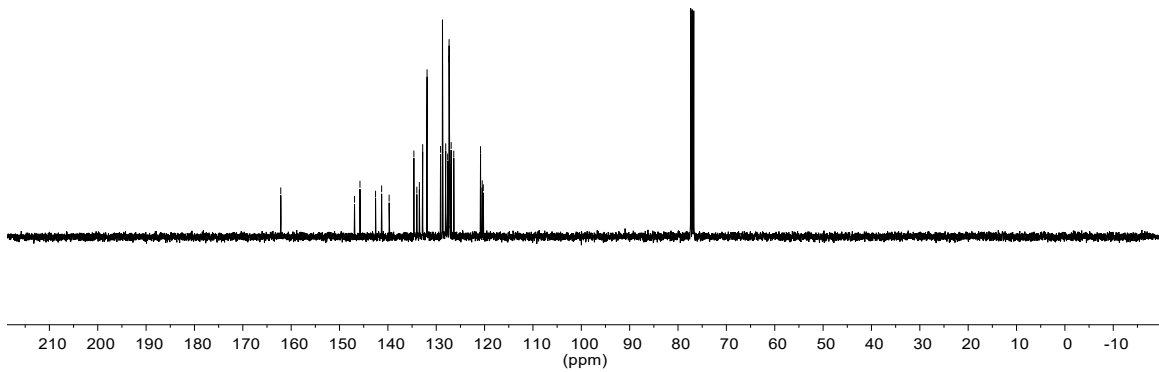

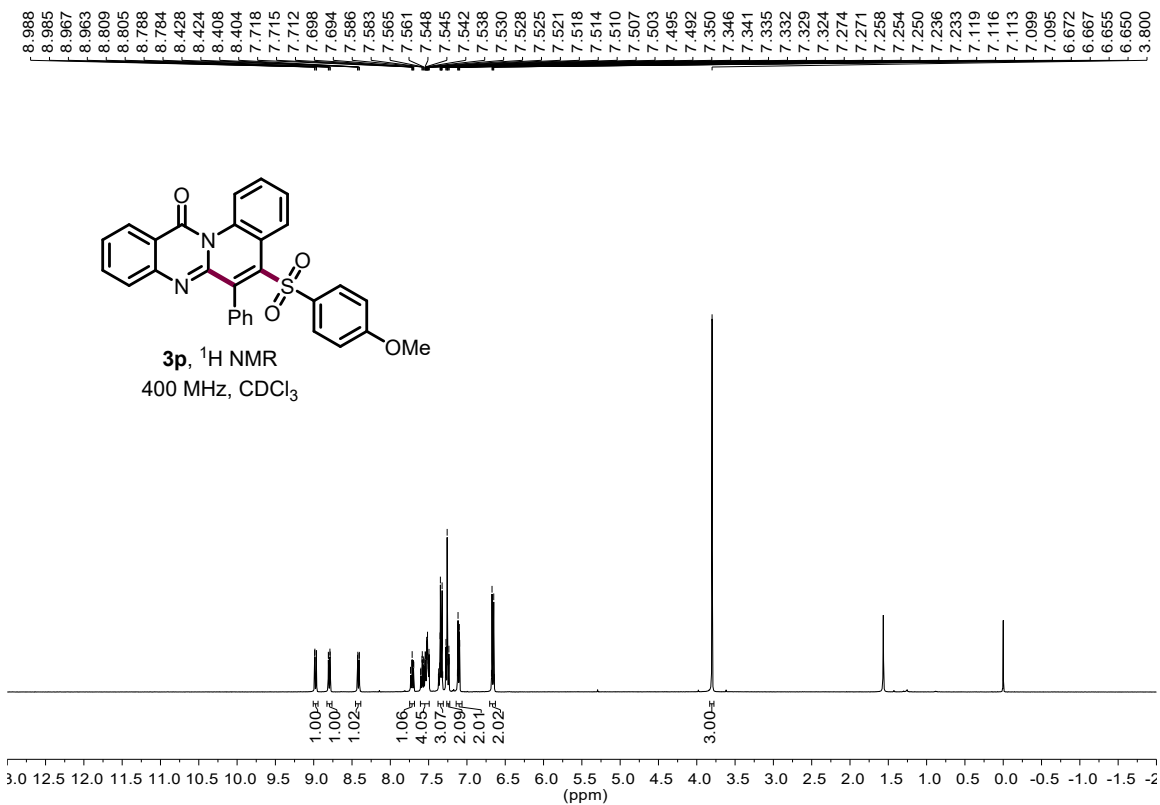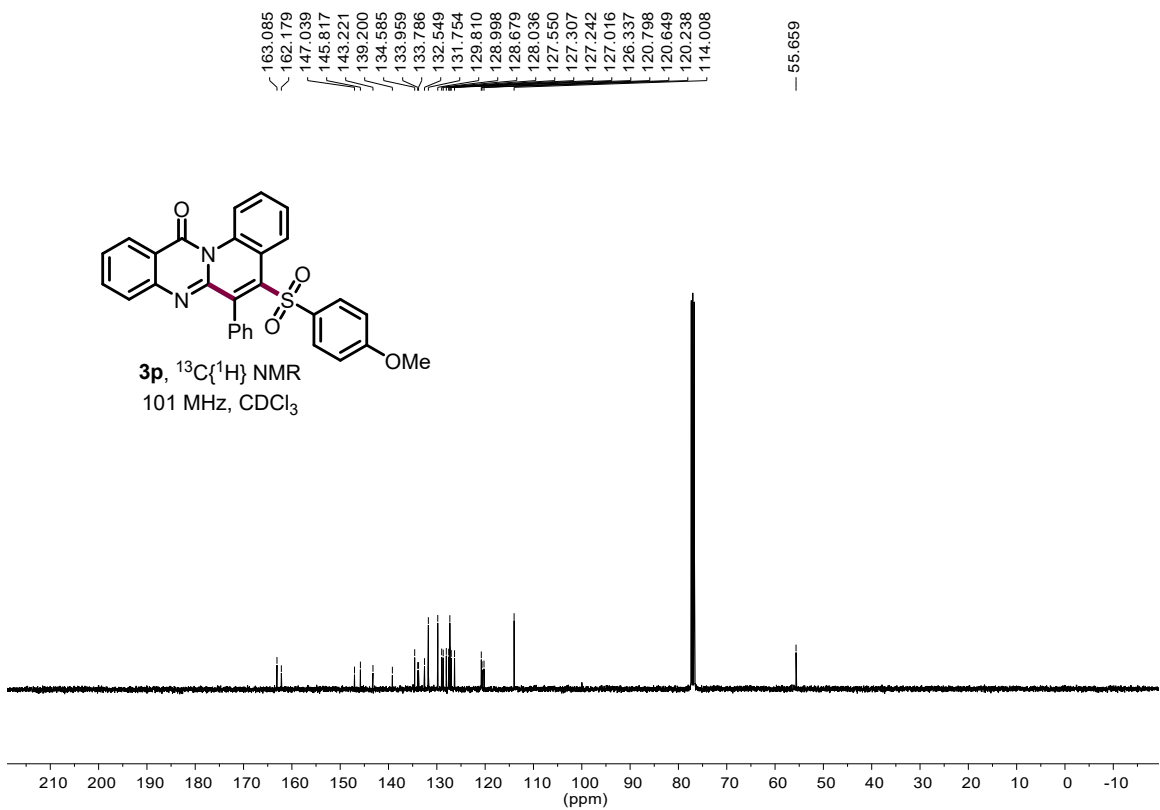

9.002  
8.998  
8.995  
8.980  
8.977  
8.974  
8.837  
8.833  
8.829  
8.817  
8.813  
8.809  
8.438  
8.434  
8.430  
8.418  
8.414  
8.410  
7.717  
7.713  
7.710  
7.696  
7.600  
7.596  
7.578  
7.578  
7.561  
7.558  
7.554  
7.550  
7.546  
7.537  
7.533  
7.529  
7.520  
7.515  
7.512  
7.509  
7.491  
7.314  
7.311  
7.298  
7.293  
7.289  
7.262  
7.259  
7.208  
7.204  
7.199  
7.187  
7.183  
7.179  
7.164  
7.161  
7.079  
7.076  
7.072  
7.059  
7.055  
7.052  
1.280

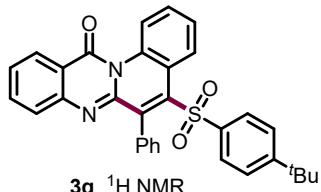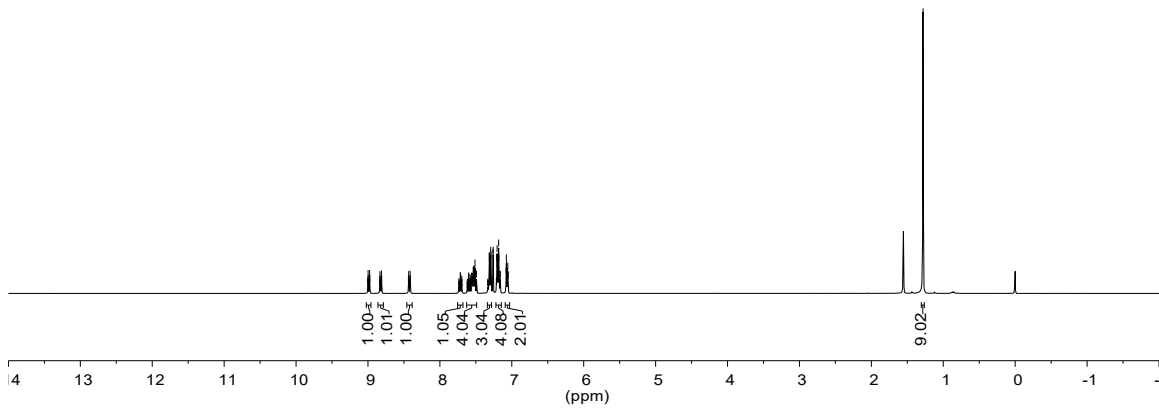

162.169  
156.606  
146.990  
145.818  
143.093  
139.220  
138.058  
134.572  
133.998  
133.583  
131.925  
129.036  
128.546  
128.014  
127.551  
127.355  
127.281  
127.263  
127.063  
126.365  
125.707  
120.812  
120.651  
120.266  
35.100  
30.977

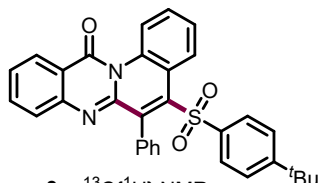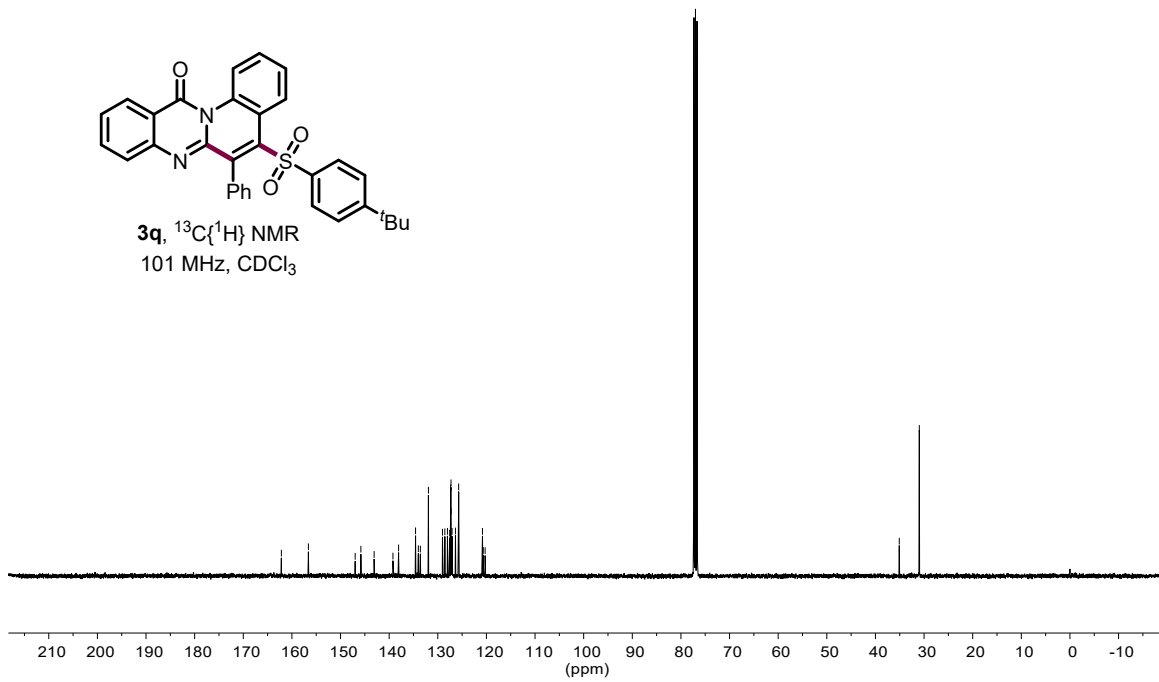

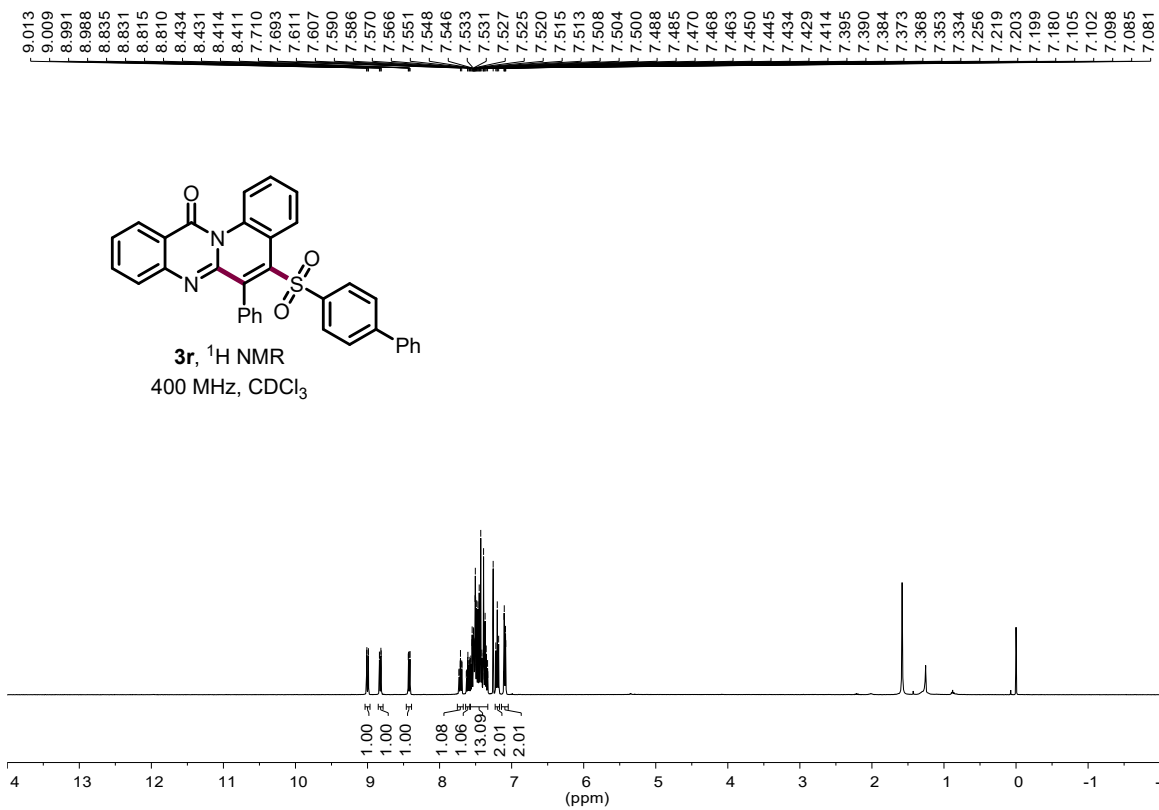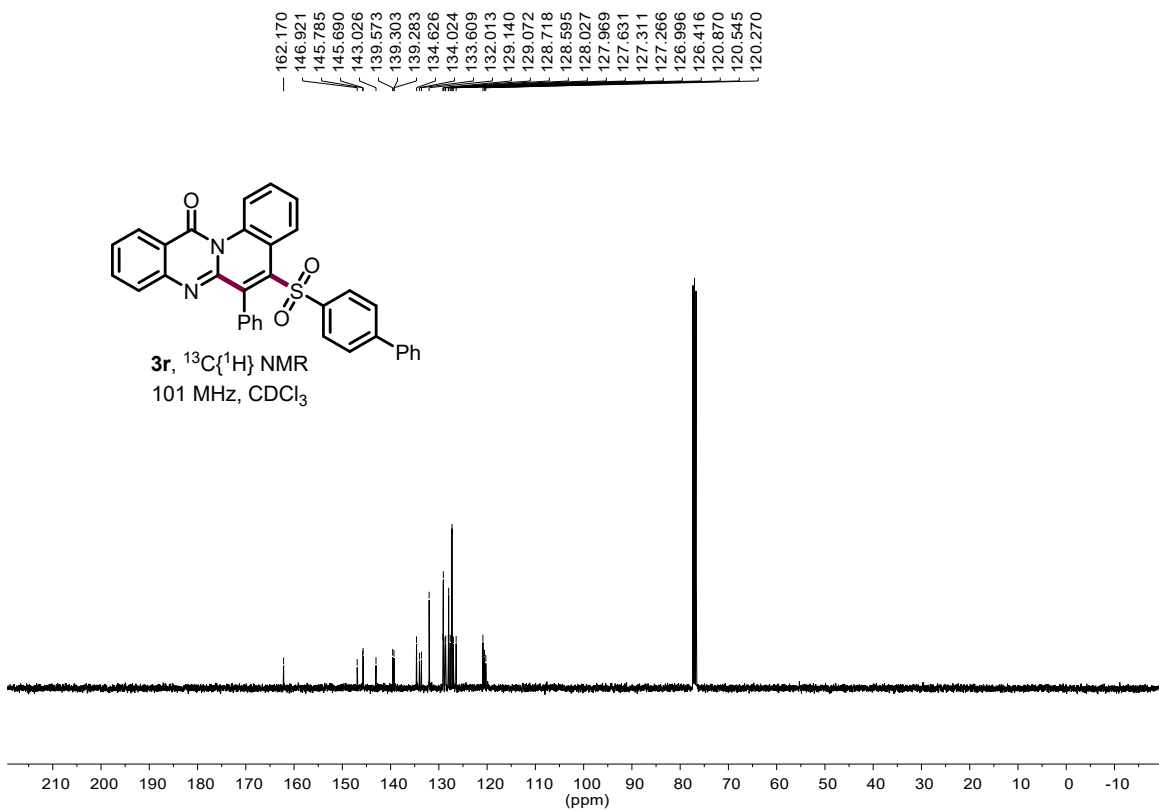

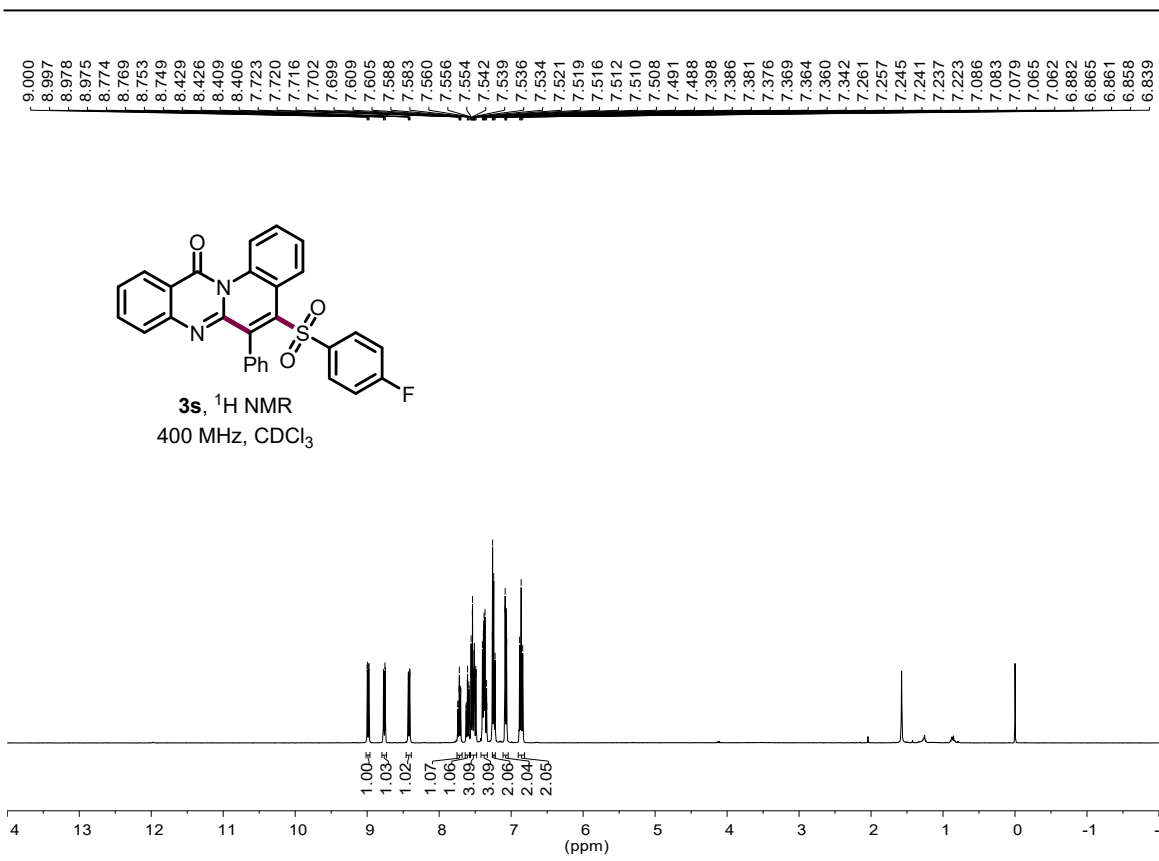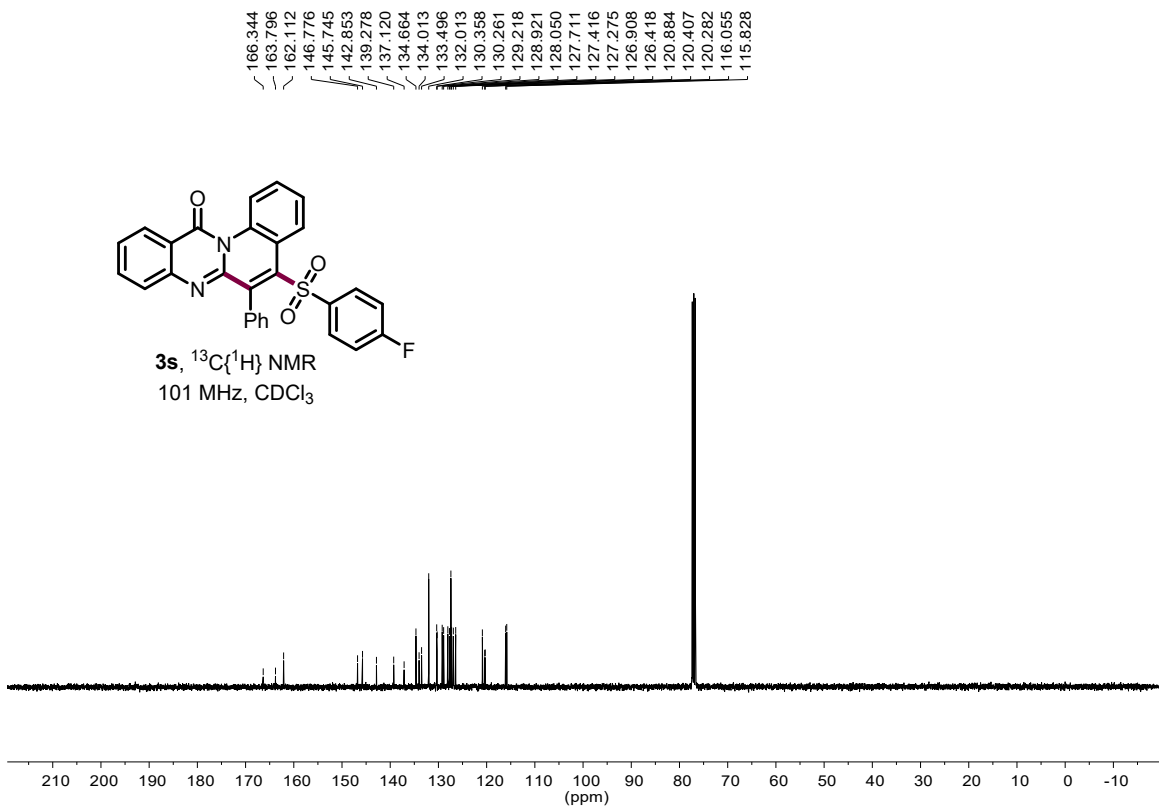



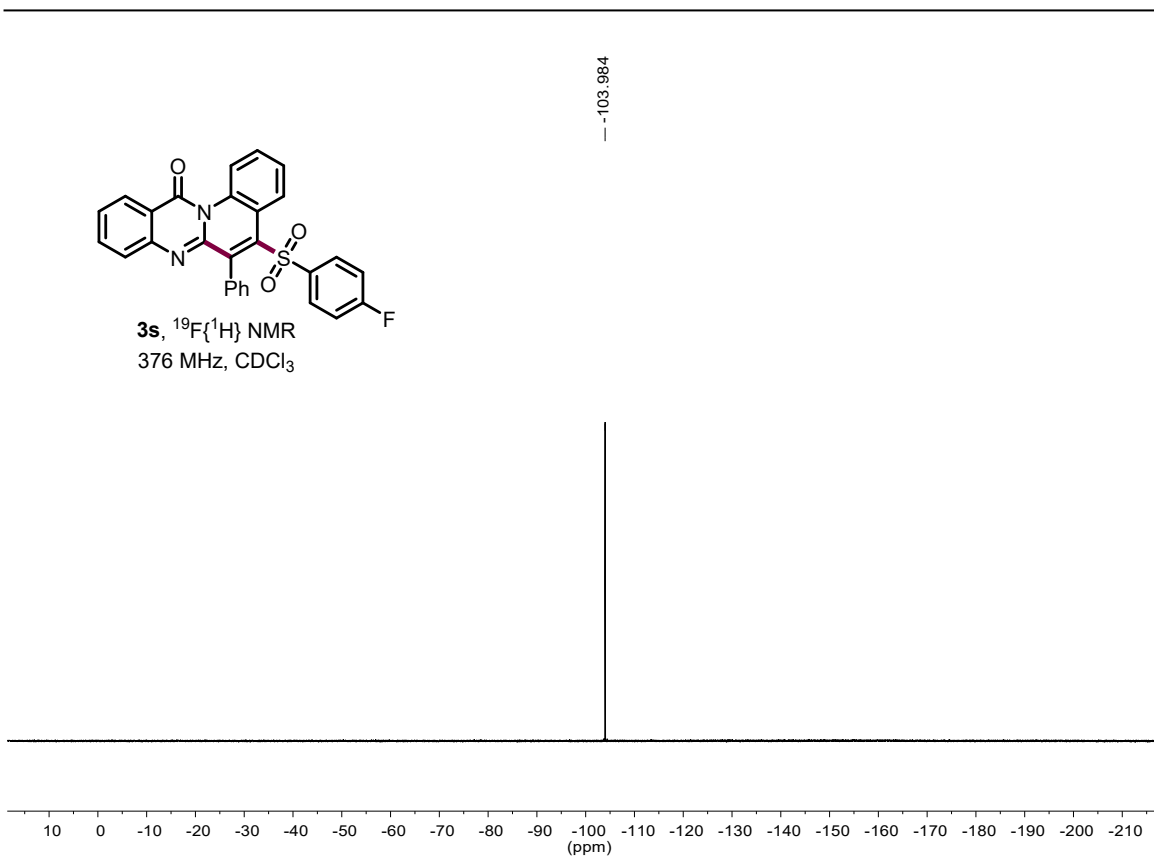

9.004  
8.901  
8.983  
8.979  
8.759  
8.754  
8.738  
8.734  
8.429  
8.425  
8.409  
8.405  
7.723  
7.719  
7.716  
7.702  
7.698  
7.610  
7.606  
7.602  
7.588  
7.584  
7.557  
7.554  
7.536  
7.519  
7.516  
7.509  
7.489  
7.372  
7.357  
7.354  
7.350  
7.313  
7.306  
7.301  
7.290  
7.284  
7.257  
7.237  
7.218  
7.168  
7.161  
7.156  
7.145  
7.140  
7.077  
7.074  
7.058  
7.054

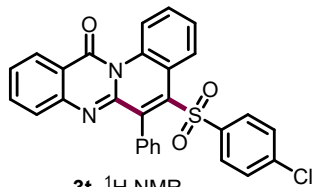

**3t**,  $^1\text{H}$  NMR  
400 MHz,  $\text{CDCl}_3$

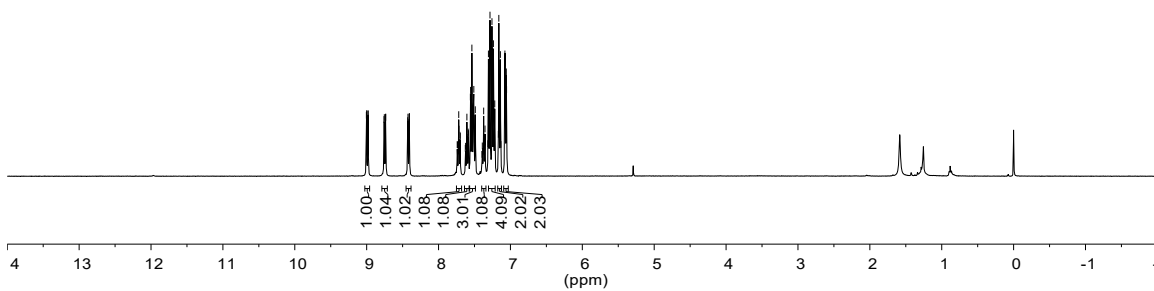

162.100  
146.728  
145.731  
142.701  
139.583  
139.547  
139.346  
134.667  
134.025  
133.432  
132.088  
129.247  
128.955  
128.885  
128.839  
128.042  
127.729  
127.383  
127.277  
126.855  
126.431  
120.907  
120.340  
120.282

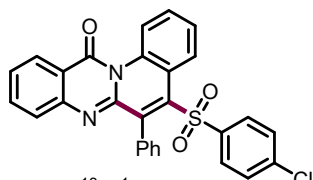

**3t**,  $^{13}\text{C}\{^1\text{H}\}$  NMR  
101 MHz,  $\text{CDCl}_3$

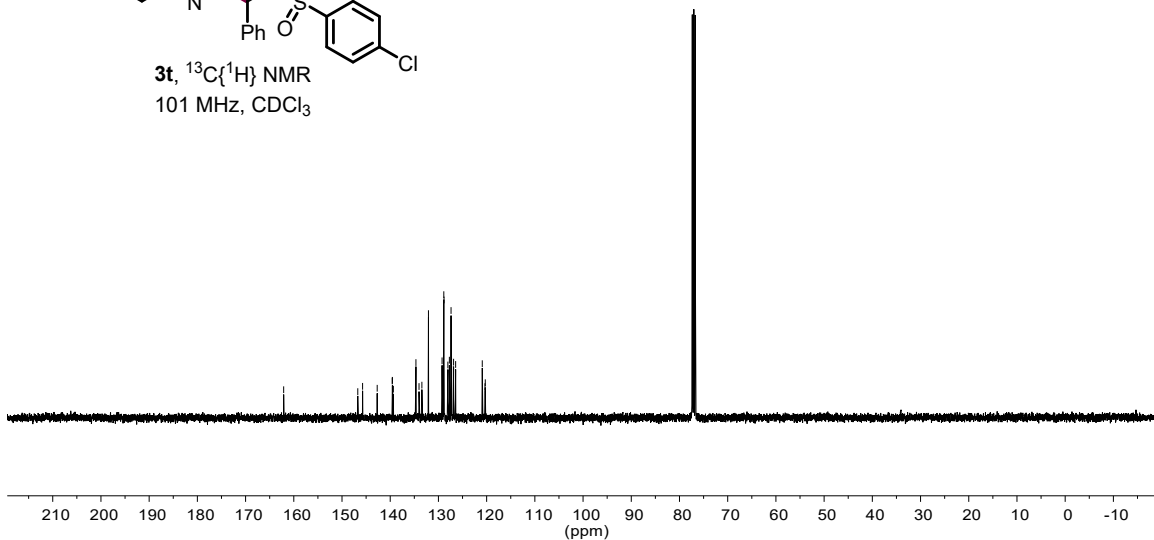

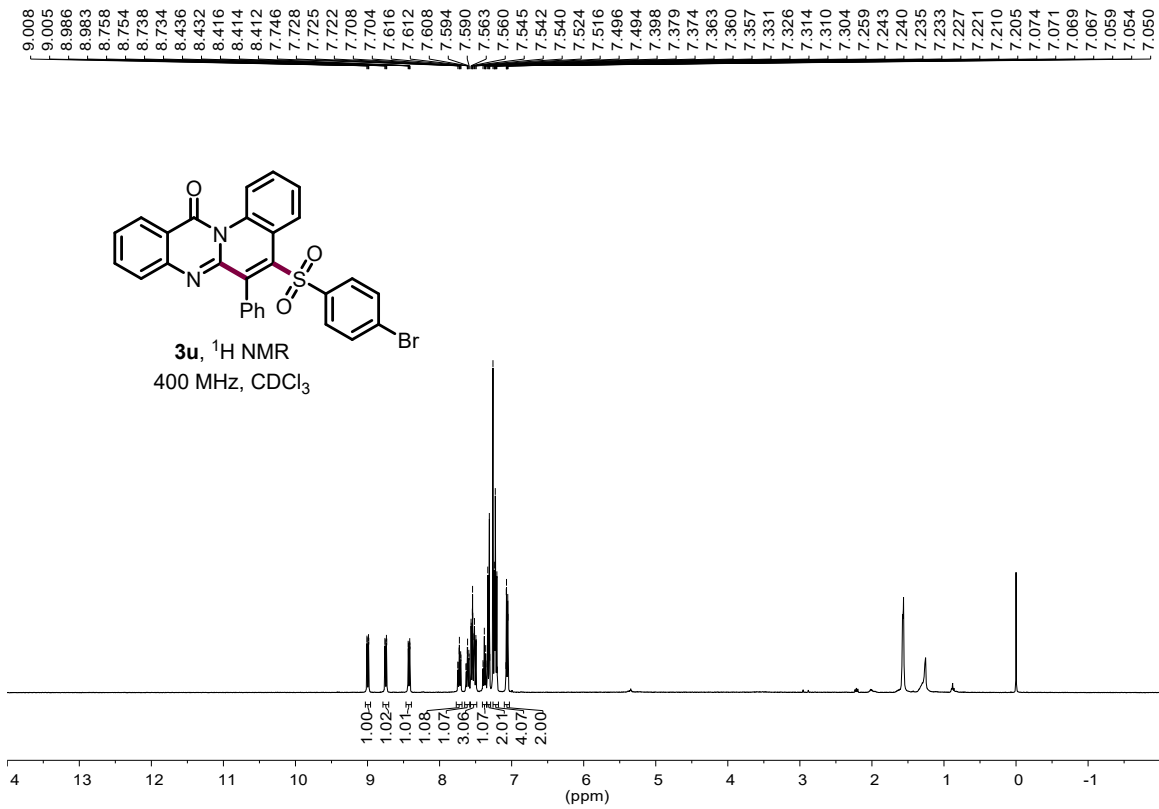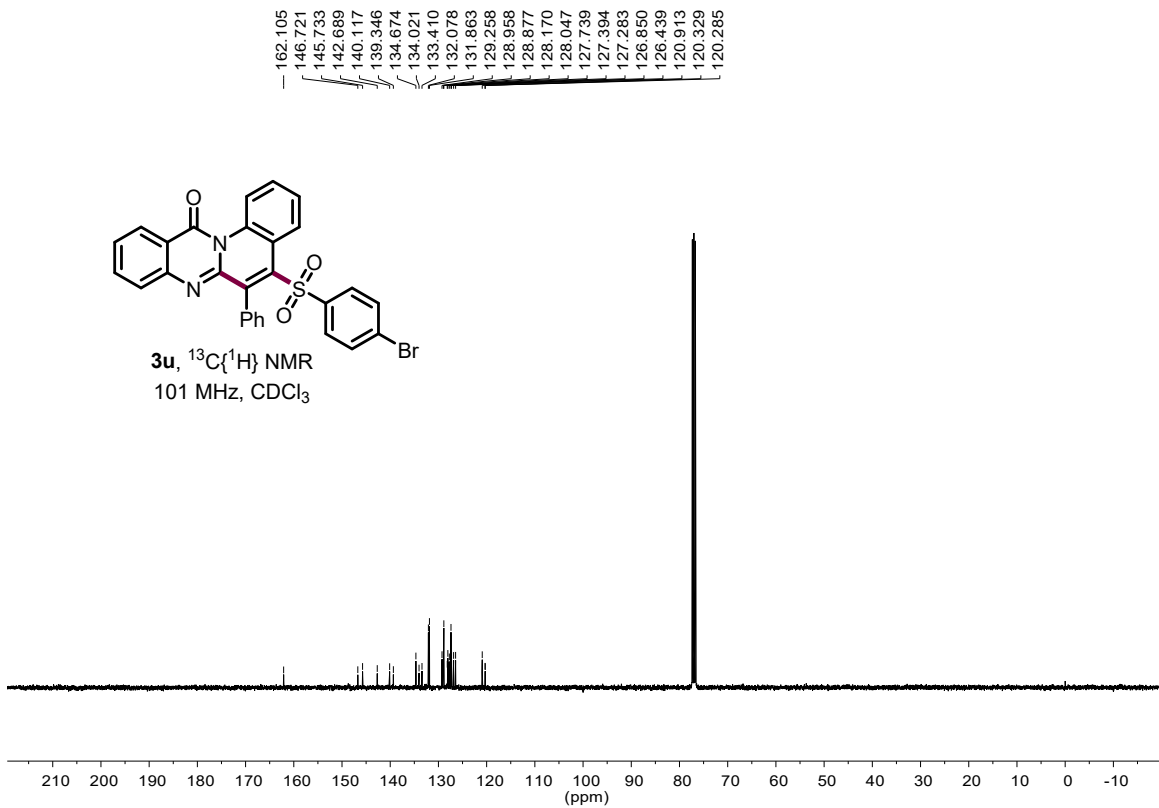

8.991  
8.987  
8.969  
8.966  
8.762  
8.758  
8.742  
8.738  
8.407  
8.404  
8.387  
8.384  
7.704  
7.700  
7.697  
7.683  
7.679  
7.679  
7.603  
7.599  
7.581  
7.577  
7.556  
7.552  
7.537  
7.534  
7.532  
7.520  
7.517  
7.514  
7.497  
7.488  
7.486  
7.467  
7.465  
7.398  
7.392  
7.381  
7.375  
7.339  
7.320  
7.251  
7.215  
7.211  
7.199  
7.195  
7.191  
7.177  
7.057  
7.054  
7.051  
7.049  
7.037  
7.033  
7.002  
6.999  
6.997  
6.983  
6.980  
6.977

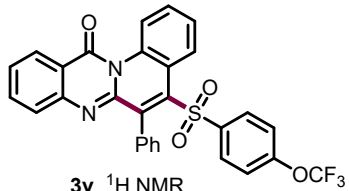

**3v**,  $^1\text{H}$  NMR  
400 MHz,  $\text{CDCl}_3$

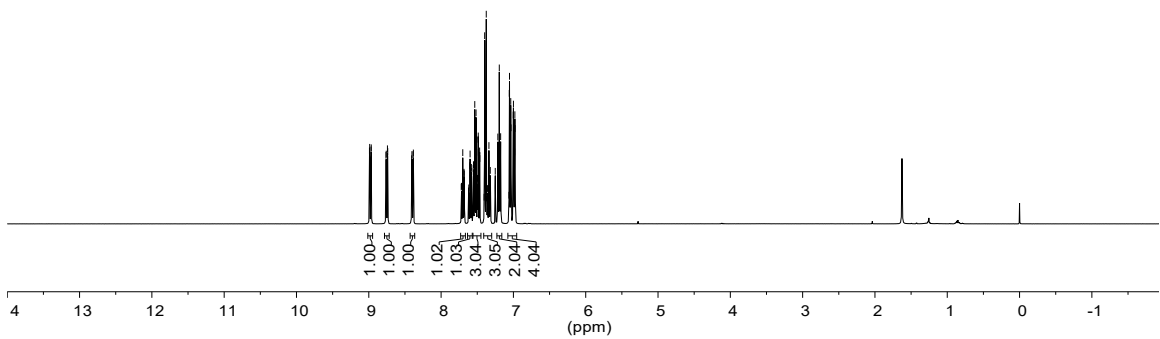

162.053  
152.062  
152.043  
152.025  
152.007  
146.673  
145.696  
142.827  
139.424  
139.081  
134.671  
134.036  
133.347  
132.189  
129.647  
129.279  
128.998  
128.006  
127.738  
127.427  
127.276  
126.880  
126.430  
124.040  
121.460  
120.910  
120.550  
120.326  
120.276  
118.880  
116.301

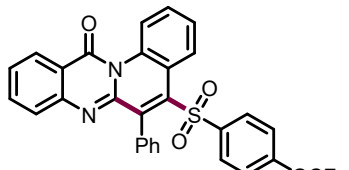

**3v**,  $^{13}\text{C}\{^1\text{H}\}$  NMR  
101 MHz,  $\text{CDCl}_3$

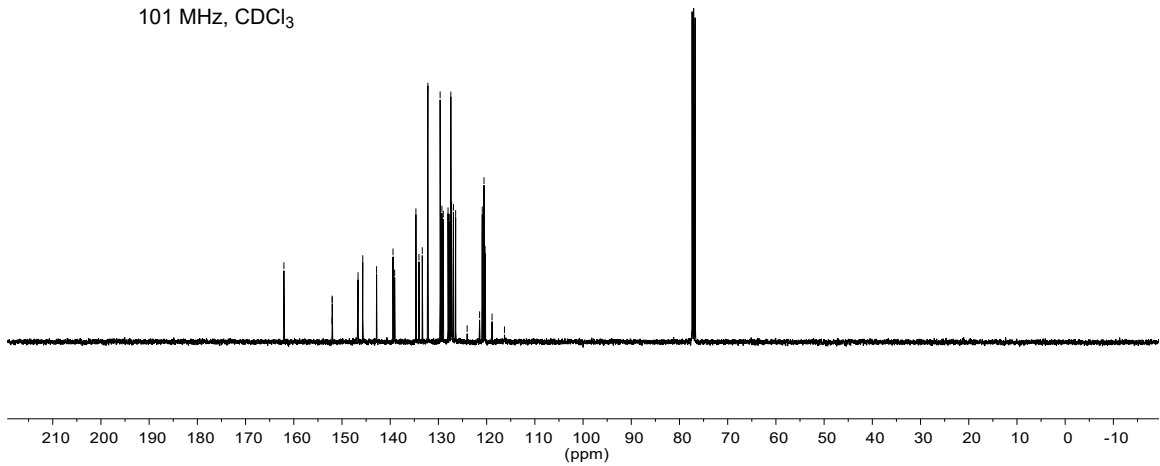

— -57.572

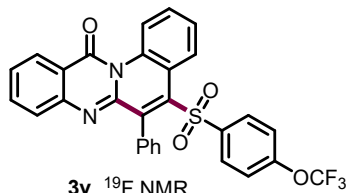

**3v**, <sup>19</sup>F NMR  
376 MHz, CDCl<sub>3</sub>

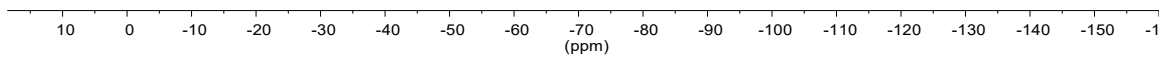

9.014  
9.010  
8.992  
8.989  
8.760  
8.756  
8.739  
8.735  
8.429  
8.425  
8.409  
8.405  
7.735  
7.721  
7.718  
7.714  
7.700  
7.696  
7.628  
7.624  
7.620  
7.606  
7.602  
7.576  
7.572  
7.560  
7.557  
7.555  
7.552  
7.542  
7.540  
7.537  
7.533  
7.522  
7.519  
7.500  
7.498  
7.496  
7.485  
7.479  
7.476  
7.463  
7.443  
7.426  
7.421  
7.339  
7.320  
7.257  
7.184  
7.180  
7.168  
7.164  
7.150  
7.145  
7.034  
7.031  
7.027  
7.019  
7.014  
7.010

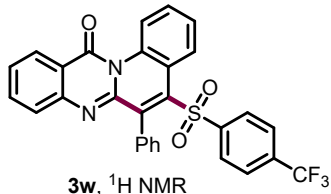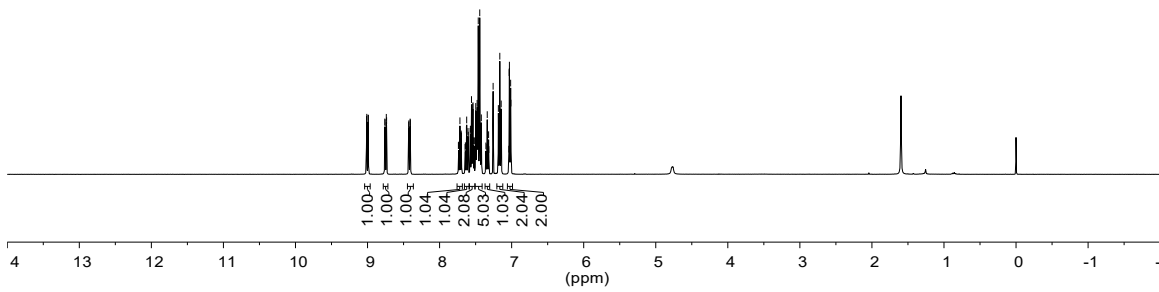

162.068  
146.572  
145.682  
144.611  
142.478  
139.335  
134.722  
134.674  
134.342  
134.075  
134.014  
133.686  
133.194  
132.268  
129.396  
129.038  
128.033  
127.875  
127.831  
127.474  
127.303  
127.122  
126.804  
126.500  
125.686  
125.648  
125.612  
125.574  
124.413  
121.700  
120.974  
120.301  
120.195  
119.006

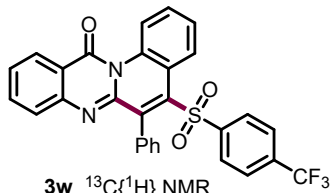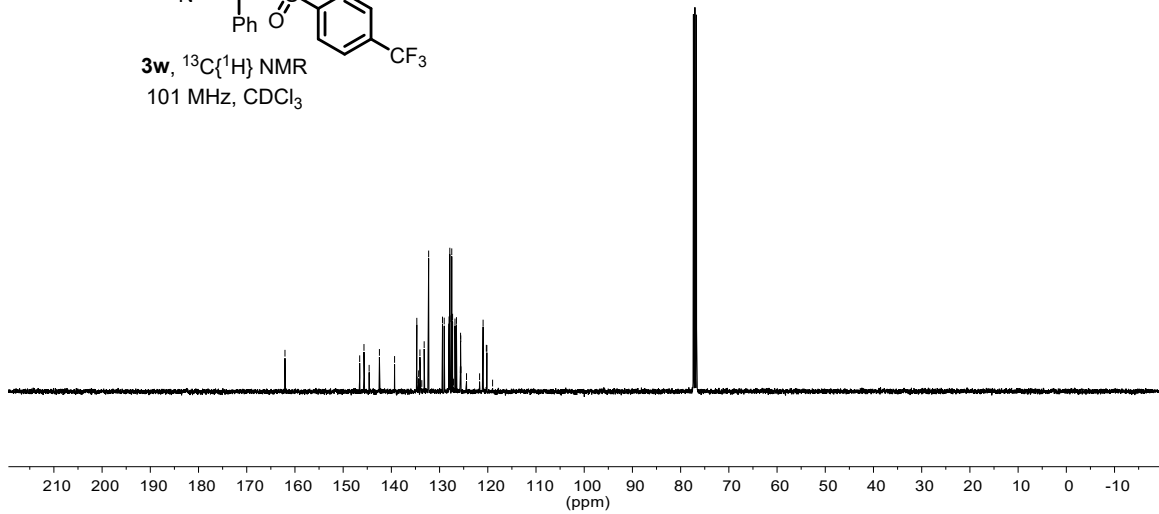

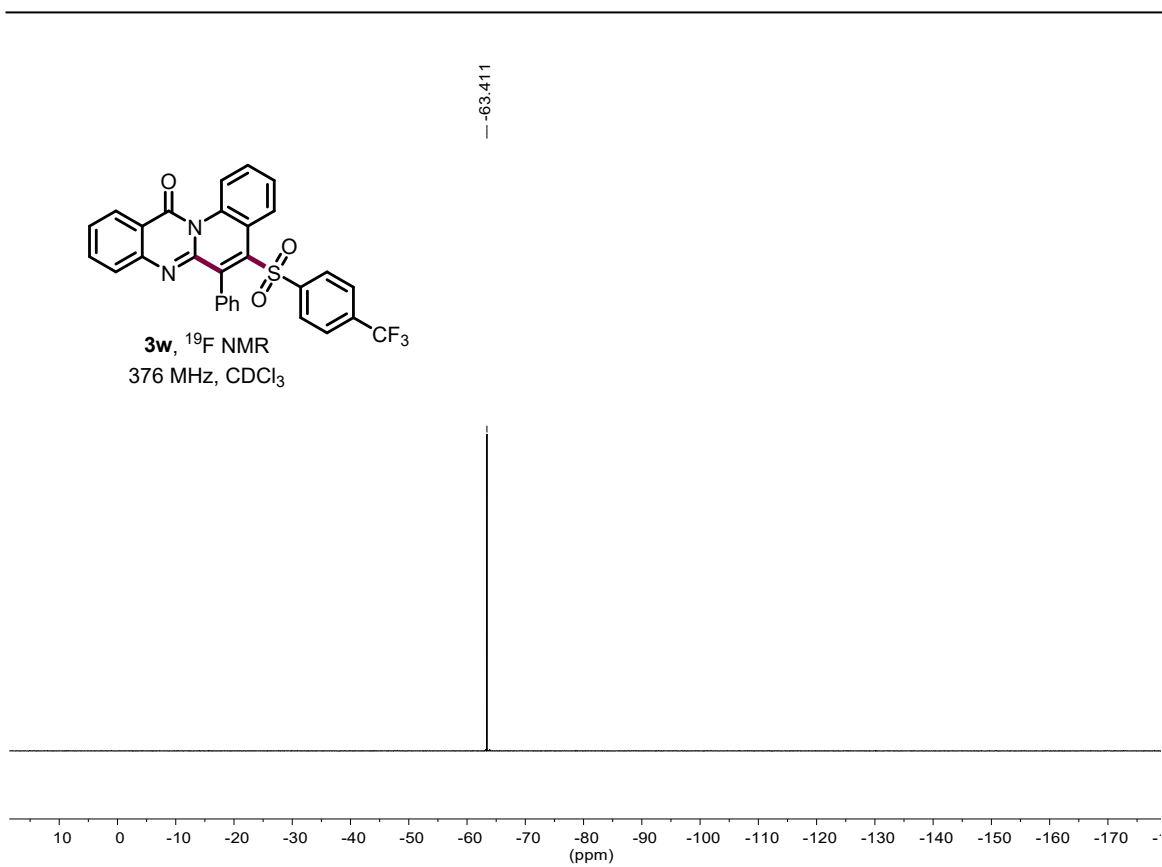

9.028  
9.025  
9.006  
9.003  
8.780  
8.776  
8.760  
8.756  
8.449  
8.445  
8.428  
8.425  
7.728  
7.725  
7.722  
7.708  
7.704  
7.612  
7.598  
7.594  
7.590  
7.576  
7.572  
7.563  
7.560  
7.542  
7.530  
7.523  
7.511  
7.495  
7.492  
7.328  
7.324  
7.308  
7.304  
7.297  
7.279  
7.271  
7.267  
7.261  
7.256  
7.252  
7.248  
7.233  
7.230  
7.170  
7.151  
7.137  
7.132  
7.090  
7.087  
7.075  
7.070  
7.066  
7.045  
7.027  
6.959  
6.920  
2.251

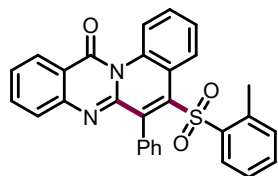

**3x**, <sup>1</sup>H NMR  
400 MHz, CDCl<sub>3</sub>

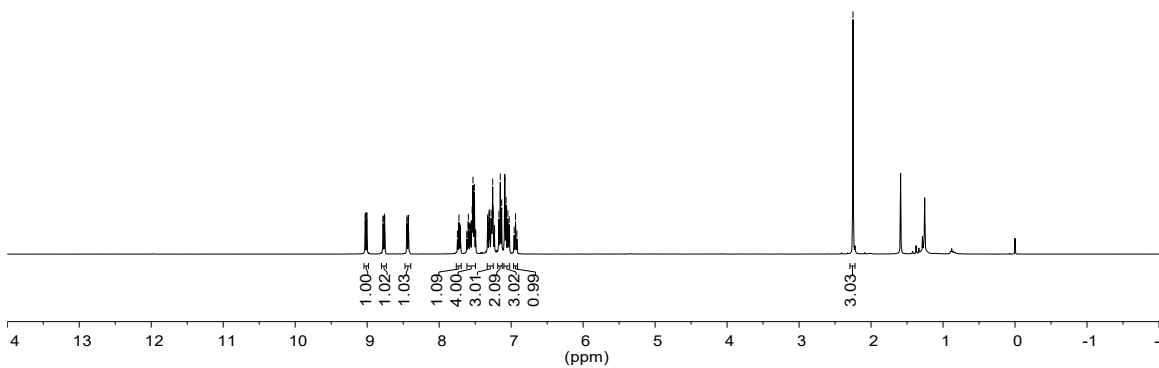

162.120  
146.838  
145.807  
142.331  
139.761  
139.134  
136.622  
134.670  
134.157  
132.958  
132.737  
131.849  
131.619  
129.199  
128.975  
128.688  
128.086  
127.670  
127.280  
127.226  
127.112  
126.432  
126.251  
120.707  
120.286  
120.188

20.256

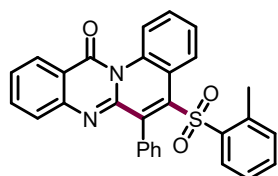

**3x**, <sup>13</sup>C{<sup>1</sup>H} NMR  
101 MHz, CDCl<sub>3</sub>

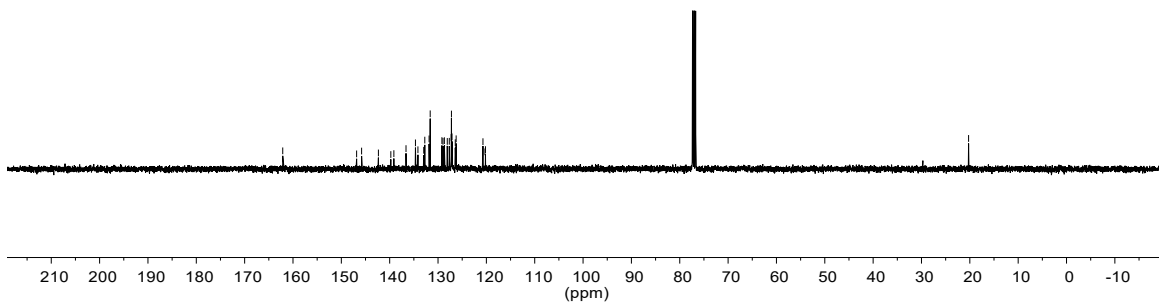



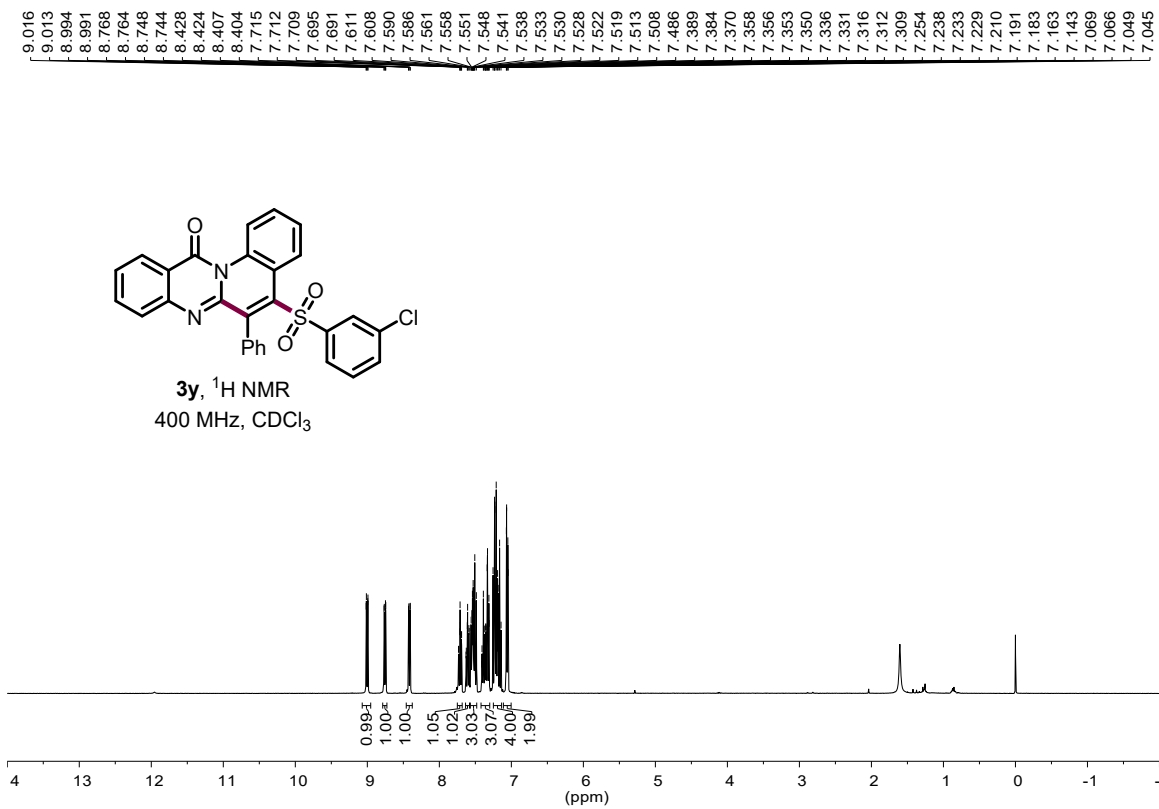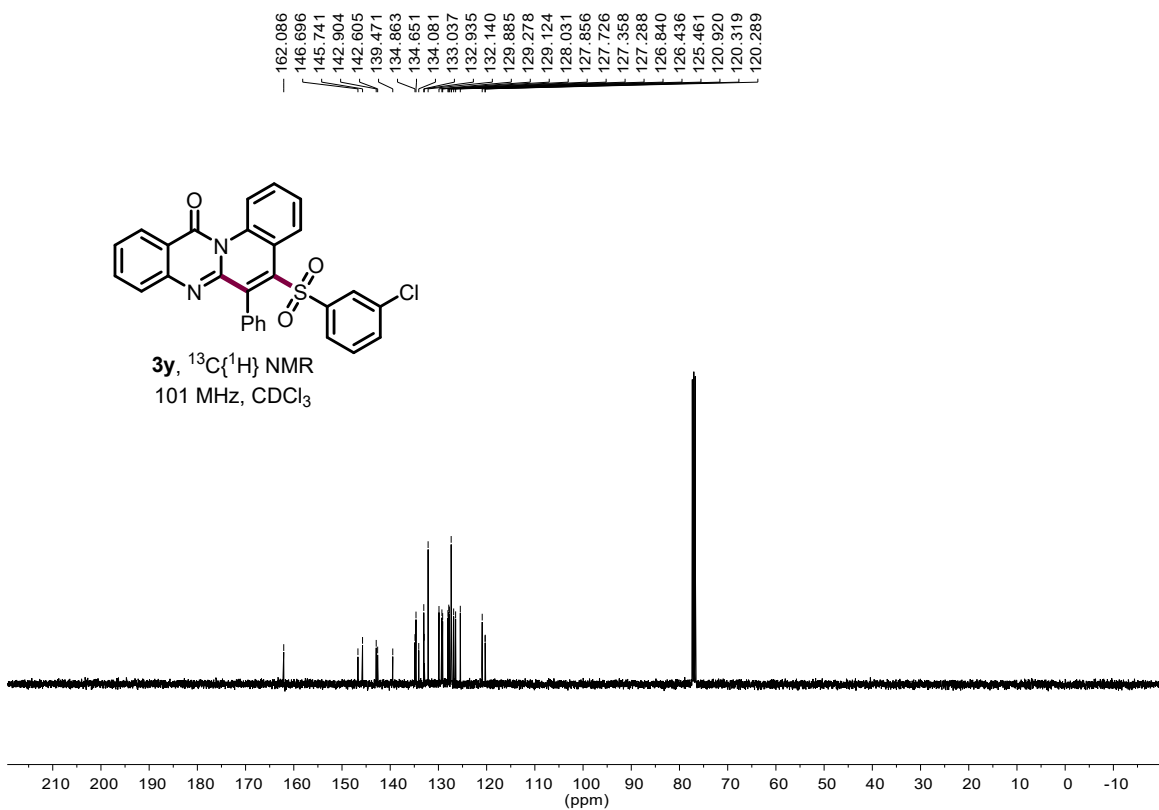

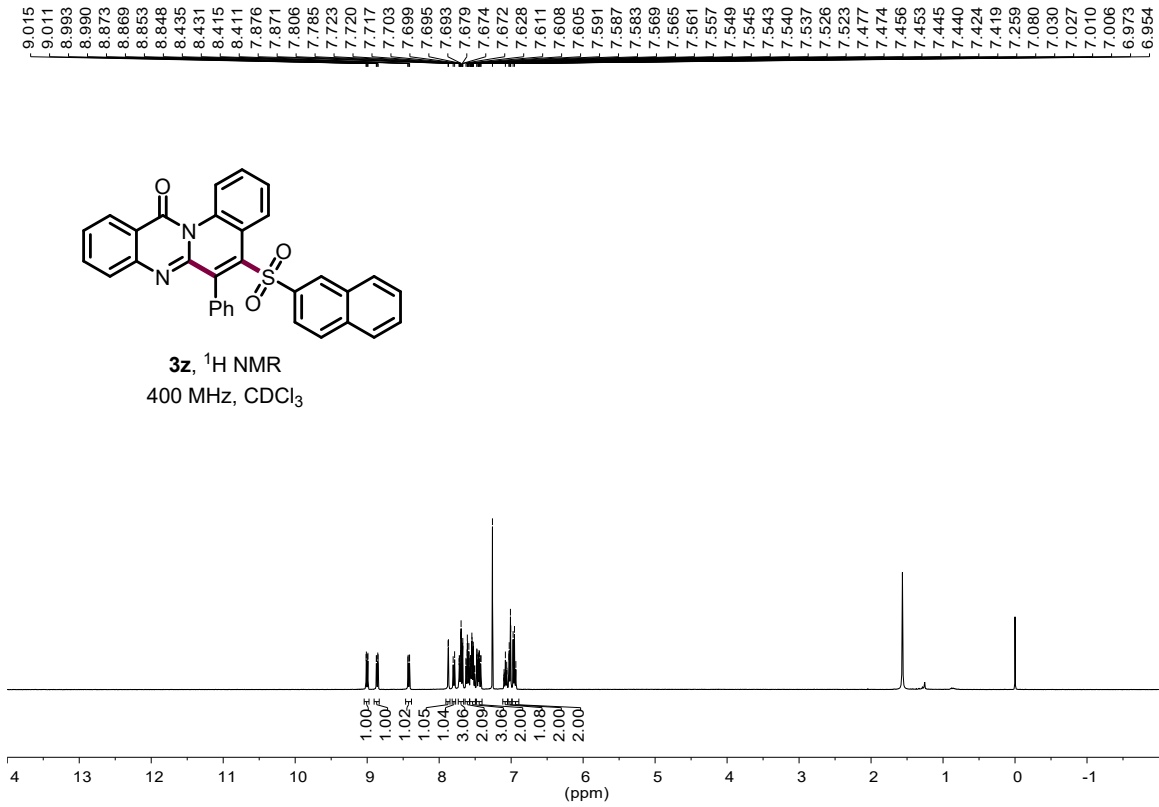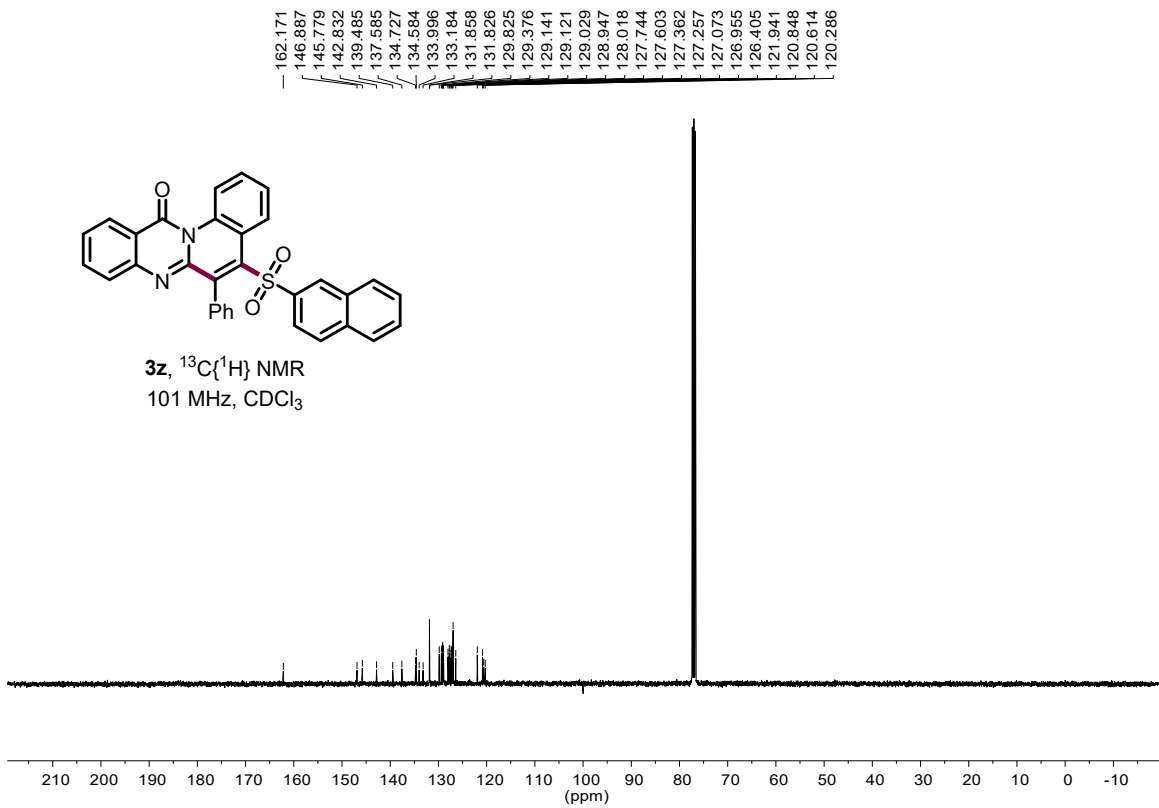

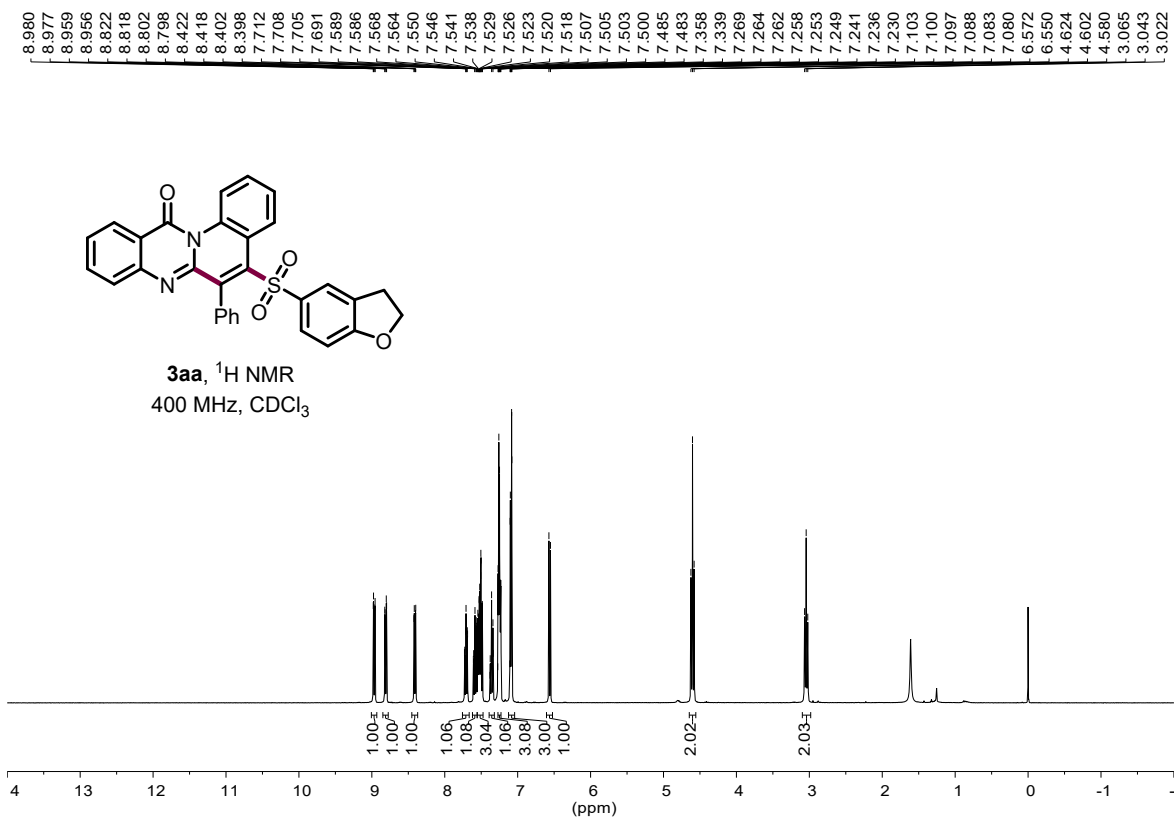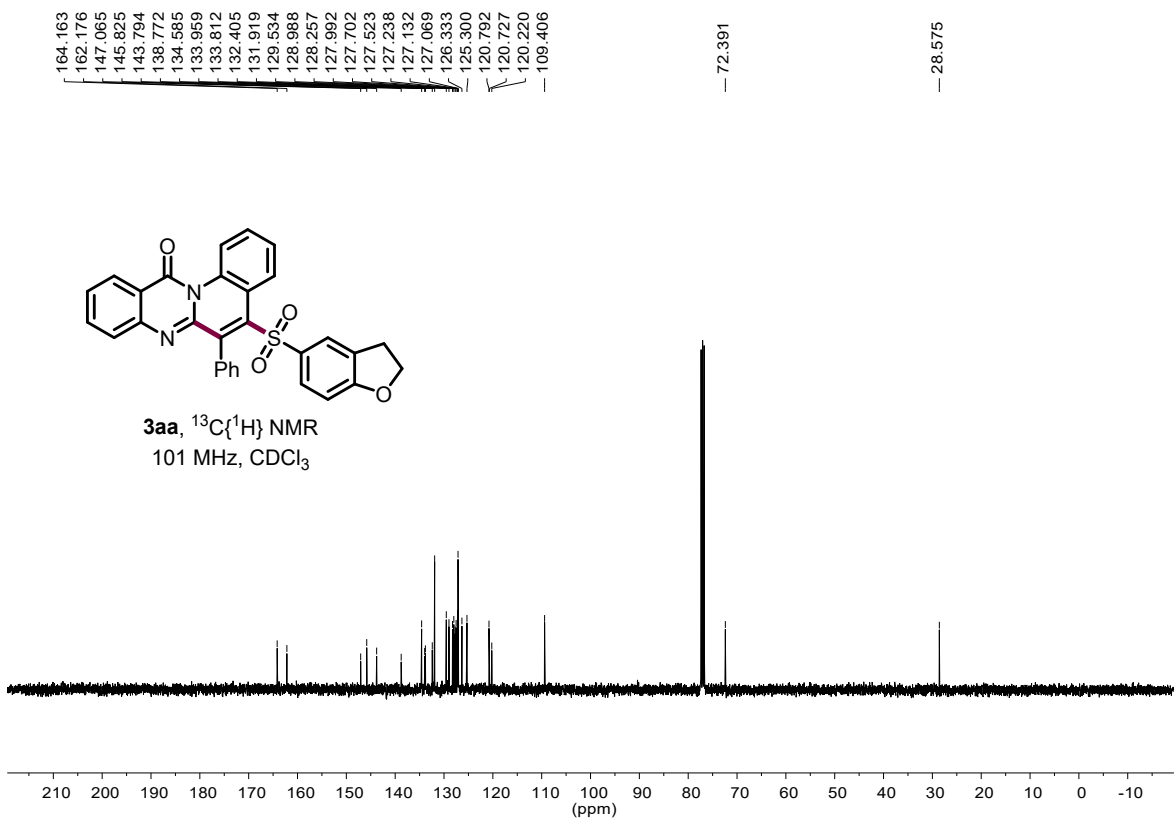

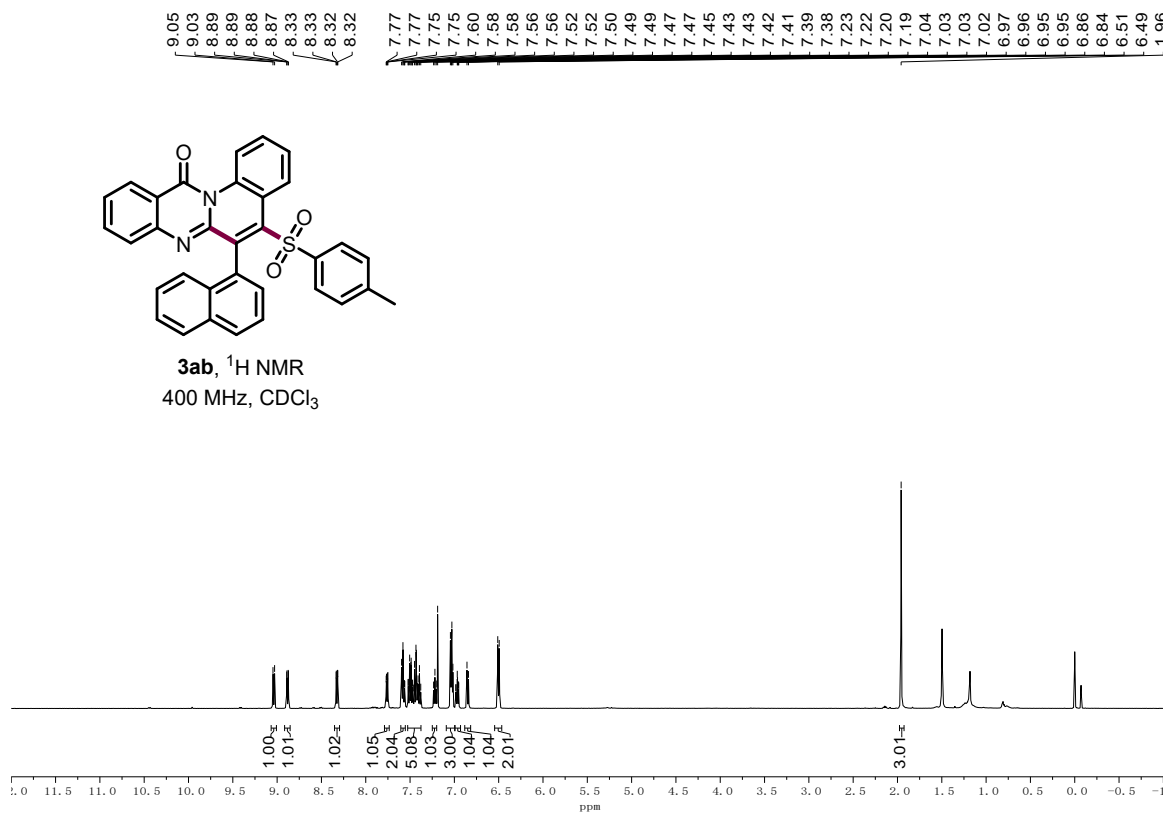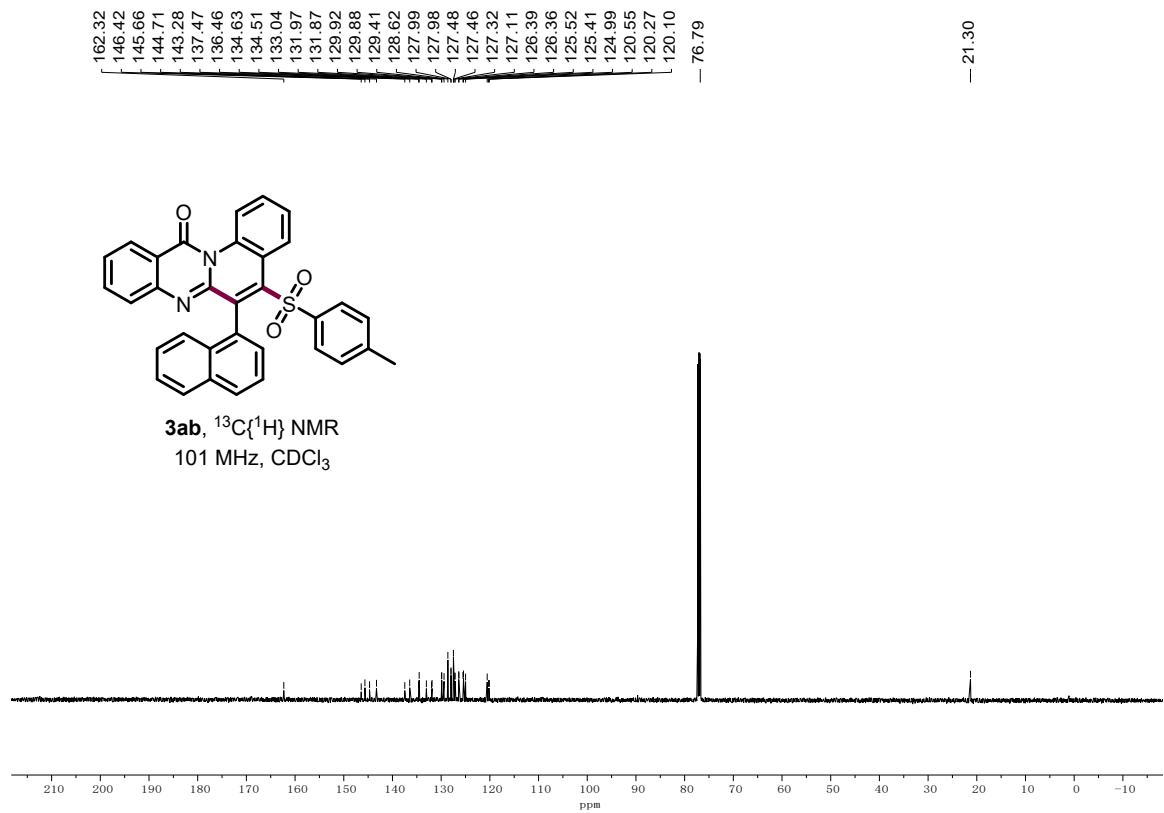

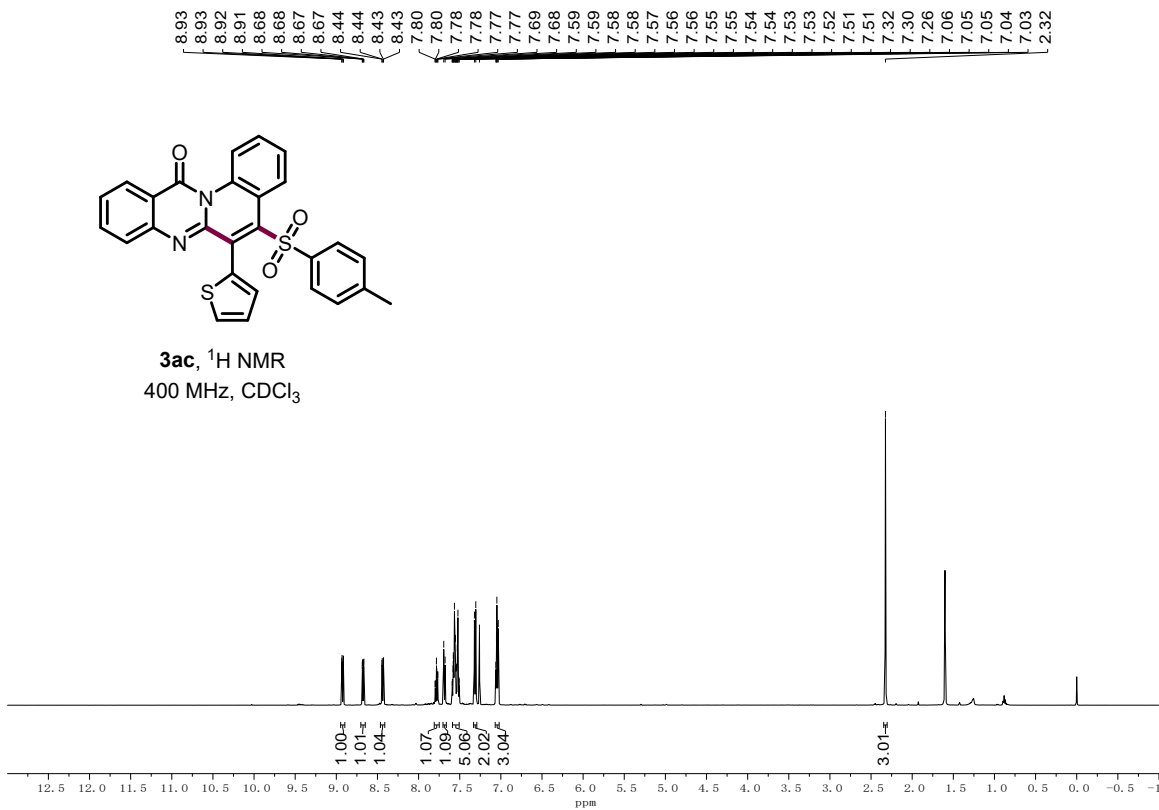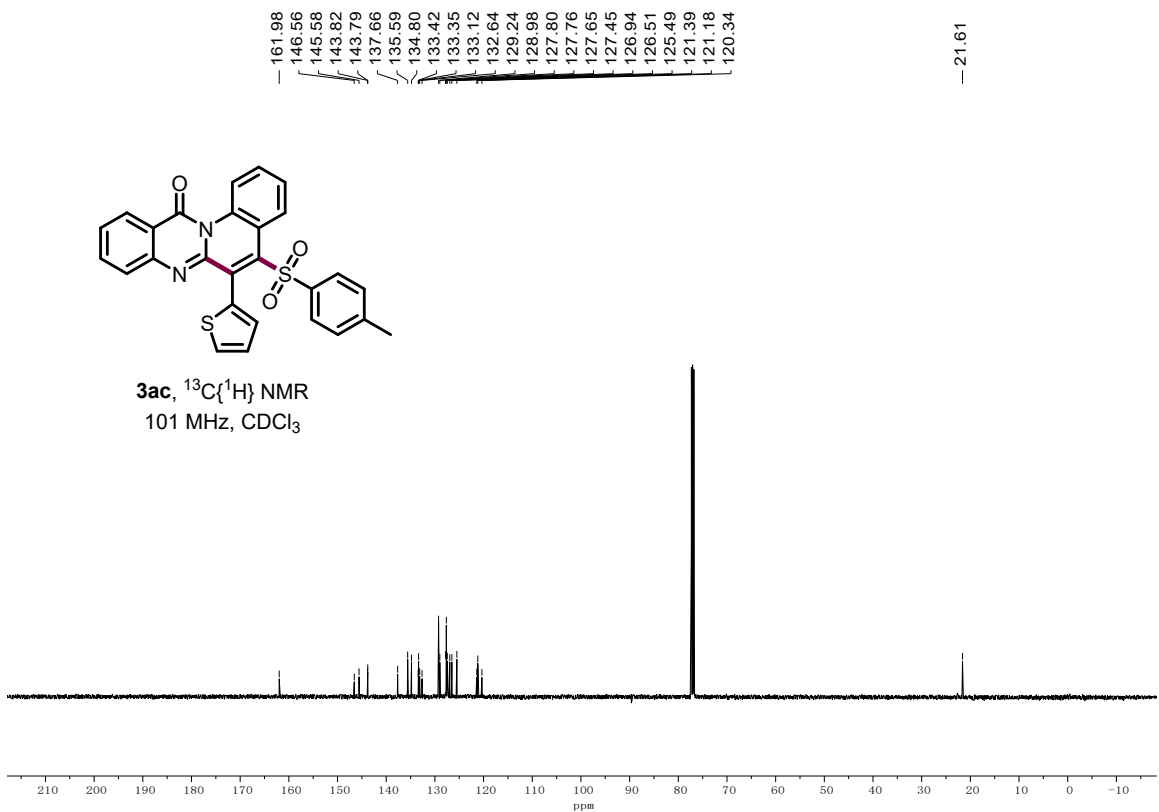

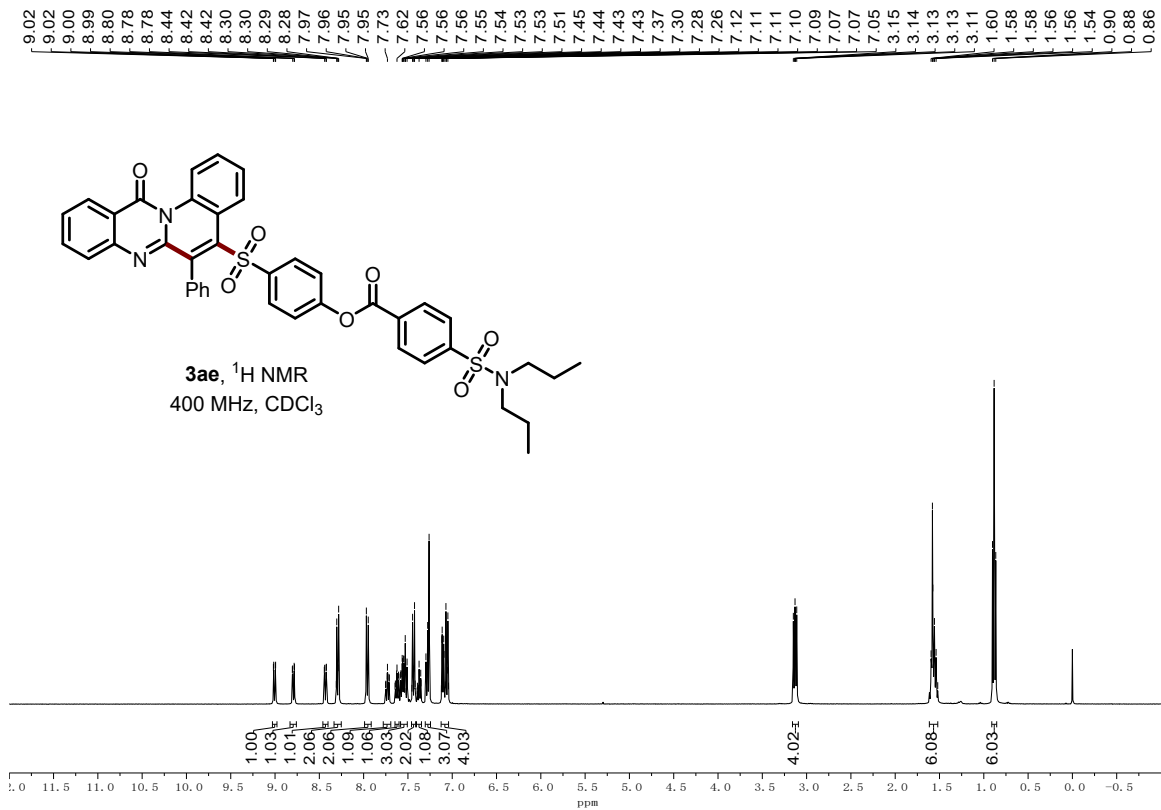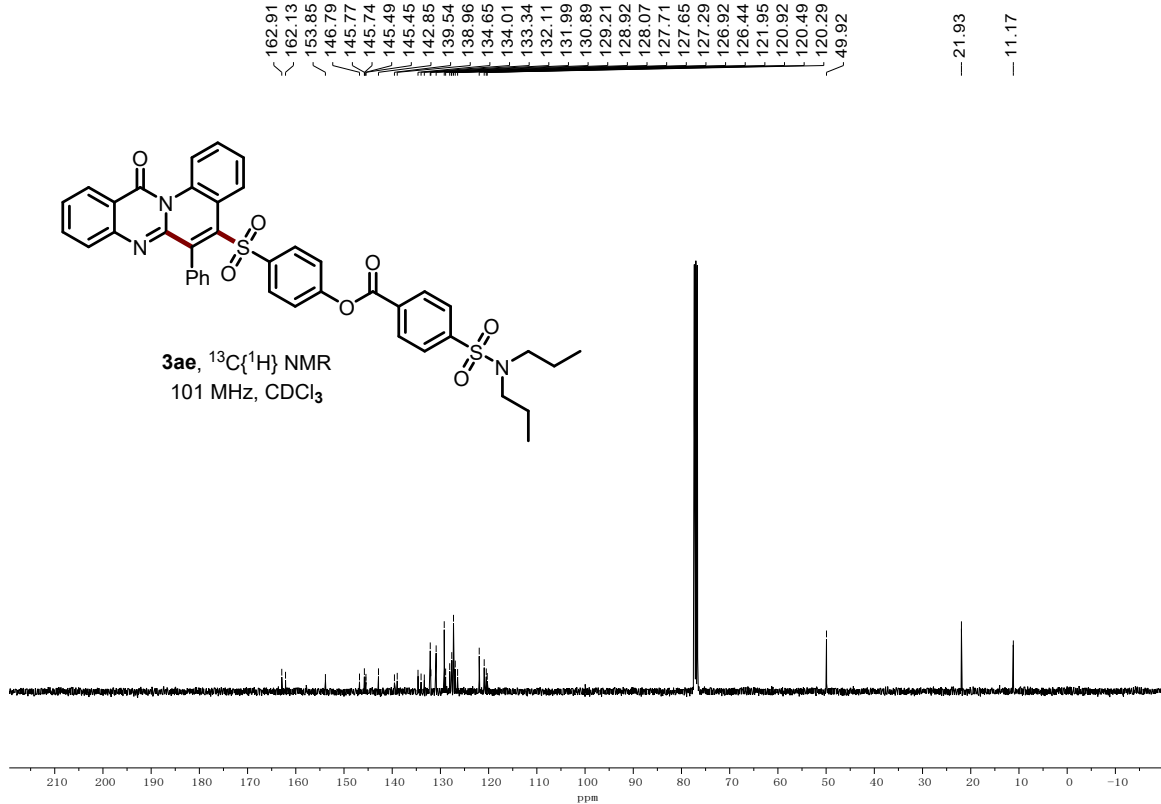

8.99  
8.97  
8.96  
8.76  
8.74  
8.74  
8.42  
8.41  
8.40  
8.39  
7.71  
7.70  
7.70  
7.69  
7.59  
7.57  
7.54  
7.54  
7.52  
7.52  
7.50  
7.50  
7.49  
7.47  
7.33  
7.32  
7.31  
7.30  
7.29  
7.27  
7.27  
7.25  
7.22  
7.20  
7.18  
7.16  
7.14  
7.05  
7.04  
7.04  
7.03  
7.02  
6.82  
6.81  
6.80  
6.80  
3.92  
3.91  
2.48  
2.46  
1.86  
1.60  
1.58  
0.91  
0.89

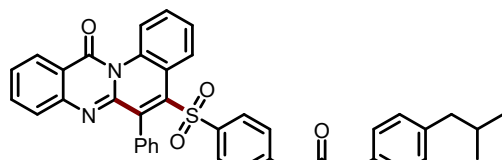

**3af**,  $^1\text{H}$  NMR  
400 MHz,  $\text{CDCl}_3$

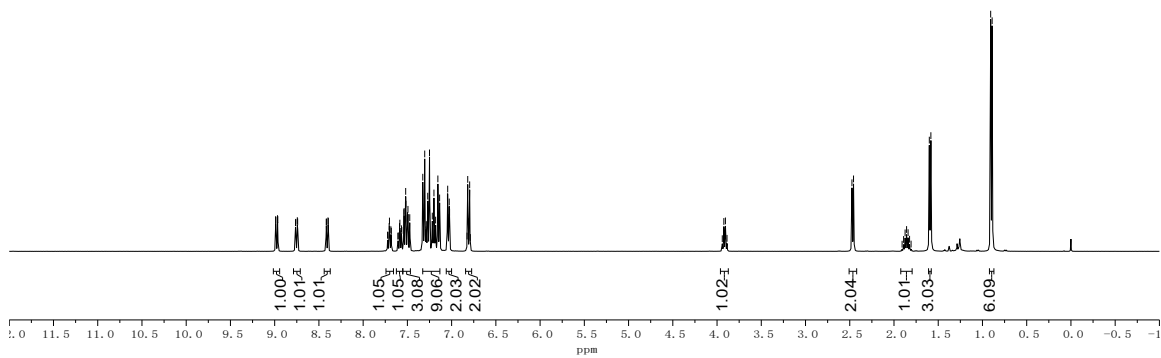

172.23  
162.10  
154.25  
146.81  
145.76  
142.90  
141.12  
139.52  
138.21  
136.67  
134.61  
133.98  
133.32  
131.99  
129.64  
129.12  
128.96  
128.82  
128.06  
127.64  
127.57  
127.26  
127.14  
126.91  
126.39  
121.78  
120.90  
120.53  
120.26  
45.25  
45.04  
30.19  
22.39  
18.37

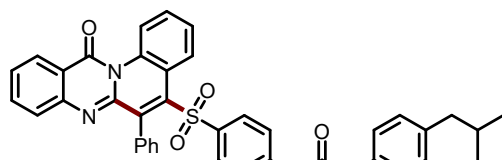

**3af**,  $^{13}\text{C}\{^1\text{H}\}$  NMR  
101 MHz,  $\text{CDCl}_3$

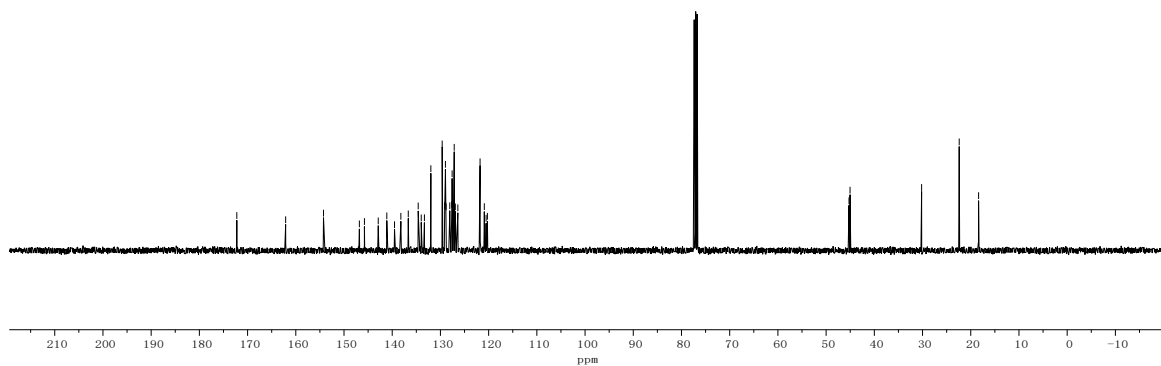

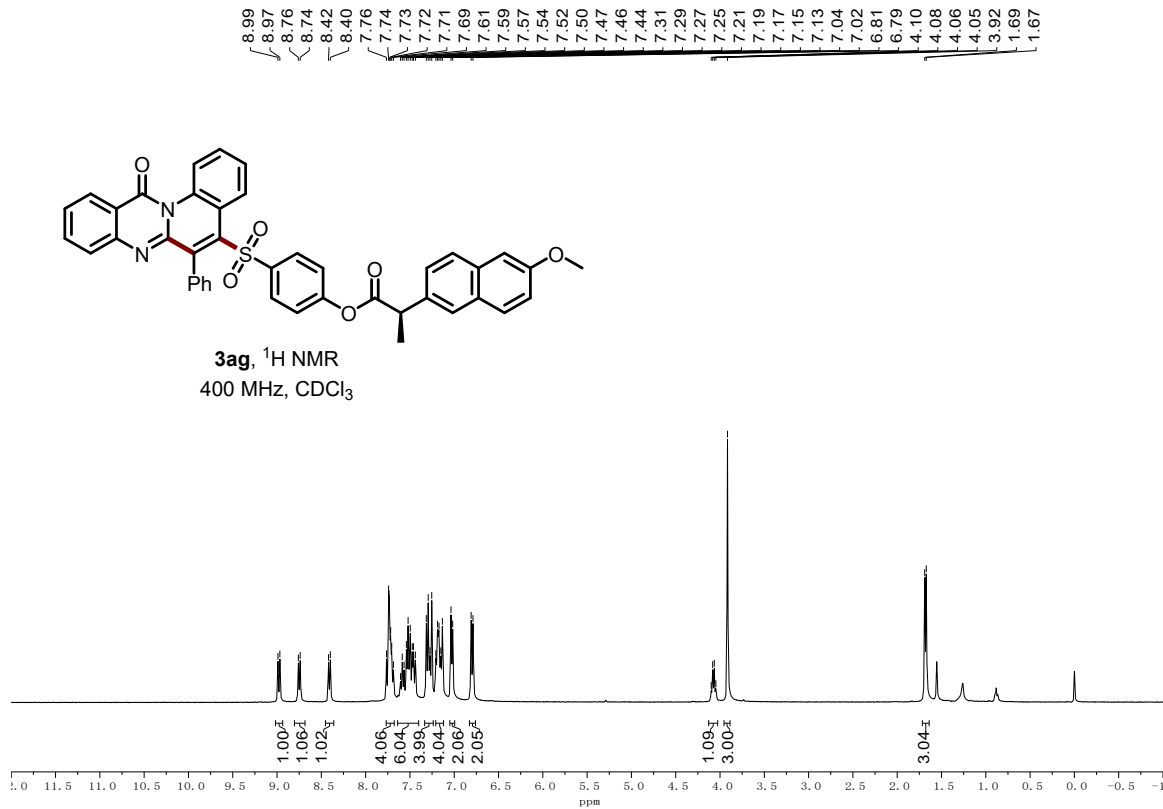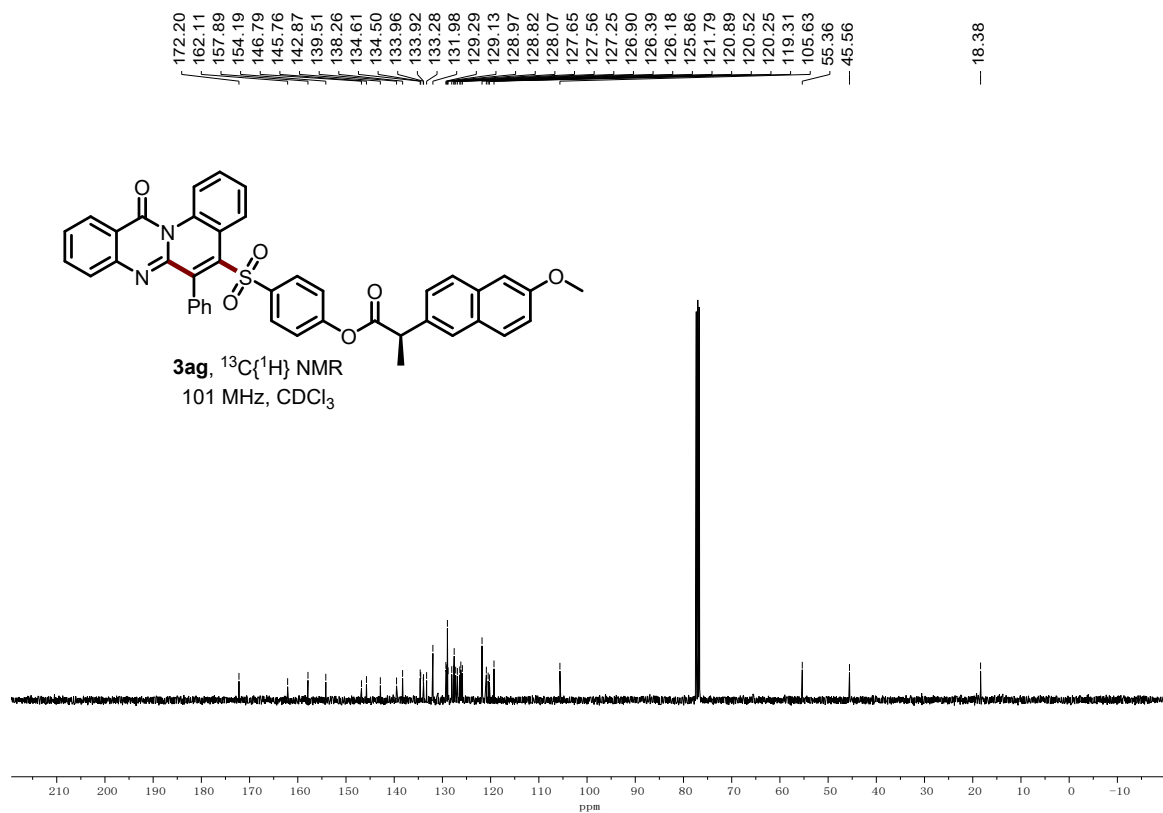



---

## 5. Reference

(1) Zeng, F.-L.; Zhang, Z.-Y.; Yin, P.-C.; Cheng, F.-K.; Chen, X.-L.; Qu, L.-B.; Cao, Z.-Y.; Yu, B., *Org. Lett.* **2022**, 24, 7912-7917.
